# Supplementary material for: Synthesis of 7-azabicyclo[4.3.1]decane ring systems from tricarbonyl(tropone)iron via intramolecular Heck reactions
Source: publisher site journal article supplement (doi:10.3762/bjoc.19.118), 2023-10-23

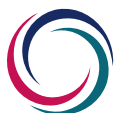

## Supporting Information

for

### Synthesis of 7-azabicyclo[4.3.1]decane ring systems from tricarbonyl(tropone)iron via intramolecular Heck reactions

Aaron H. Shoemaker, Elizabeth A. Foker, Elena P. Uttaro, Sarah K. Beitel  
and Daniel R. Griffith

*Beilstein J. Org. Chem.* **2023**, *19*, 1615–1619. [doi:10.3762/bjoc.19.118](https://doi.org/10.3762/bjoc.19.118)

### Copies of $^1\text{H}$ and $^{13}\text{C}$ NMR spectra of all purified novel compounds

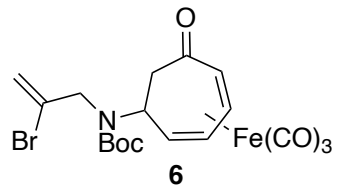

$^1\text{H}$  NMR (400 MHz,  $\text{CDCl}_3$ )

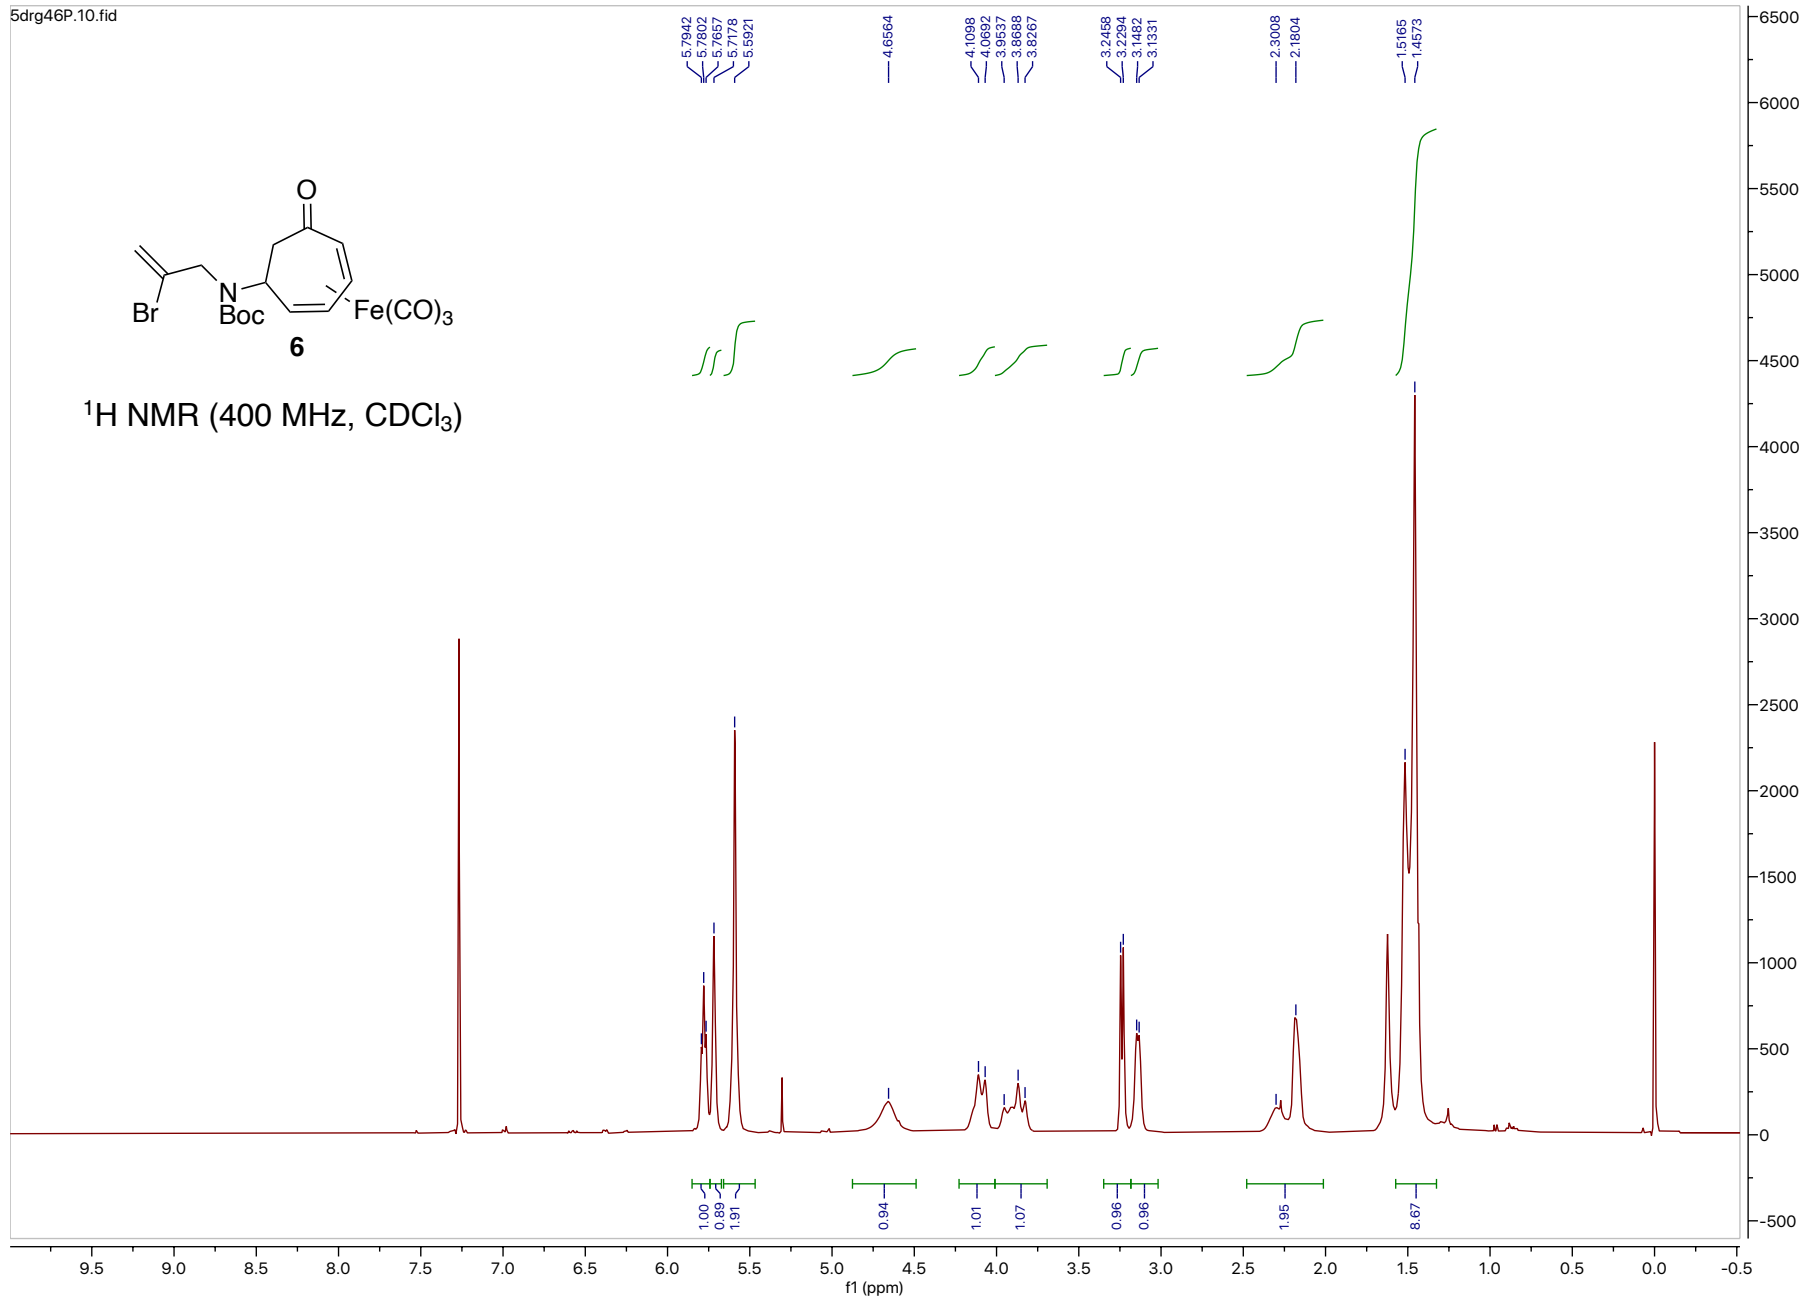

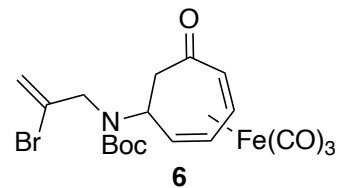

$^{13}\text{C}$  NMR (100 MHz,  $\text{CDCl}_3$ )

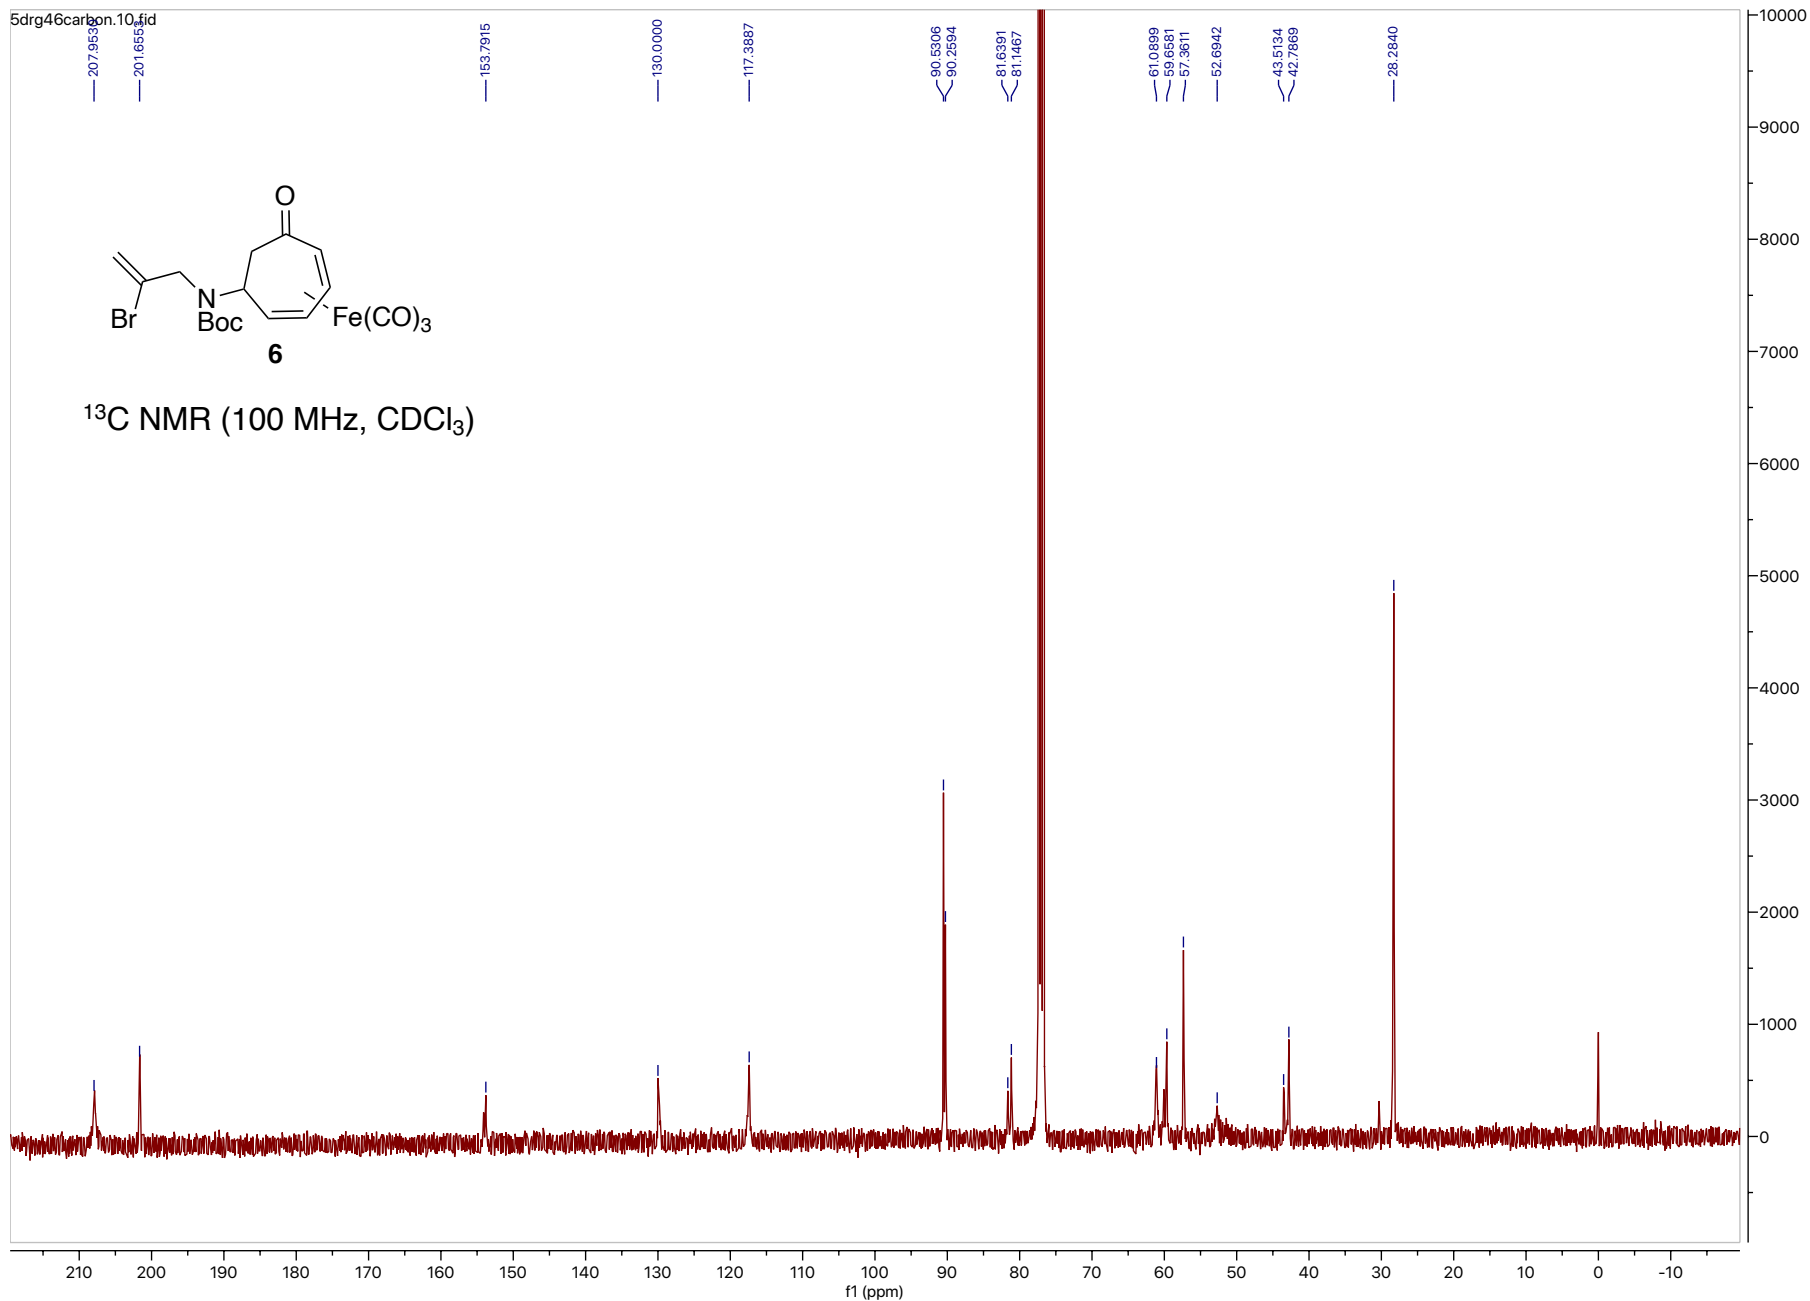

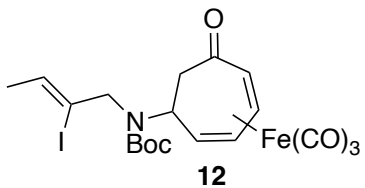

<sup>1</sup>H NMR (400 MHz, CDCl<sub>3</sub>)

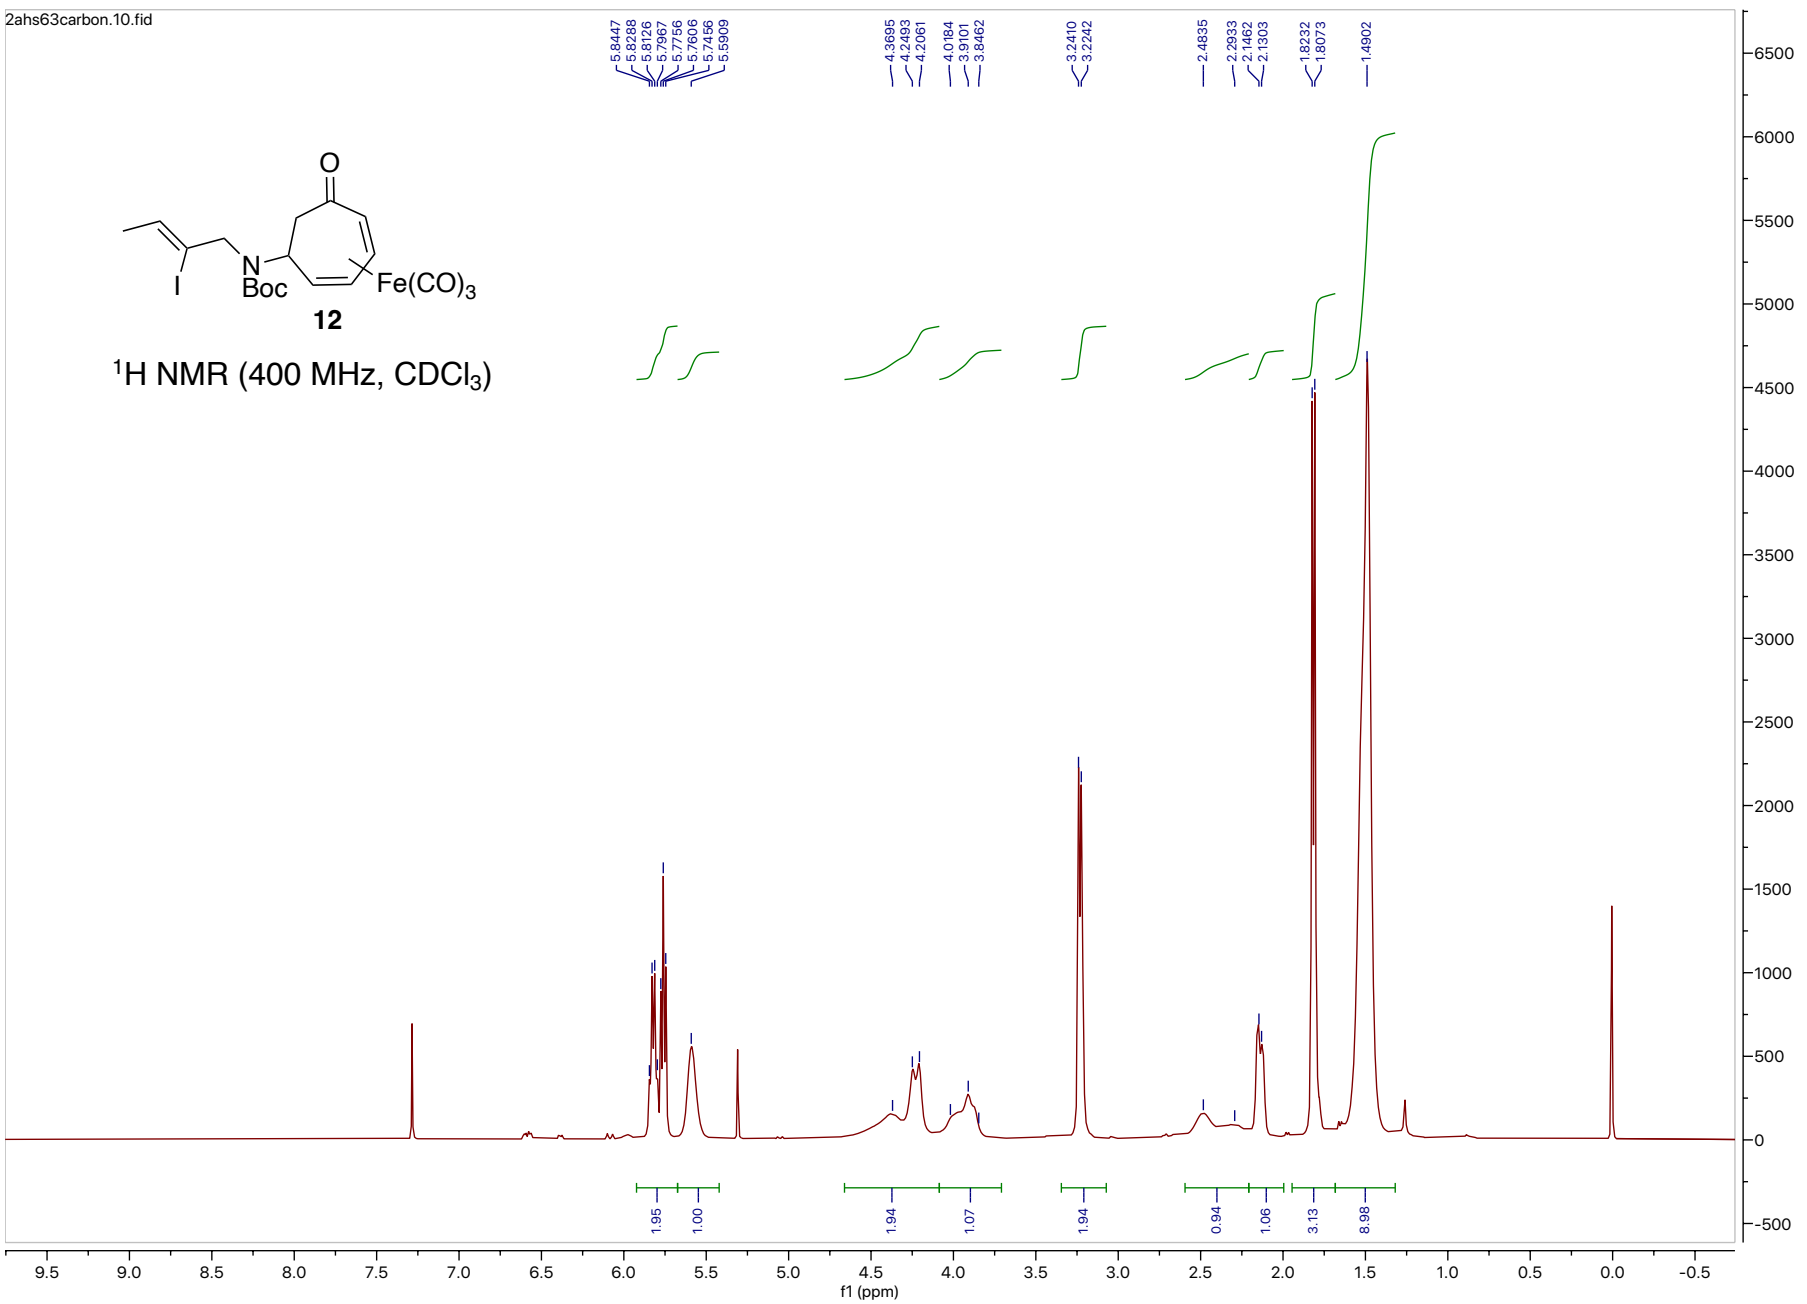

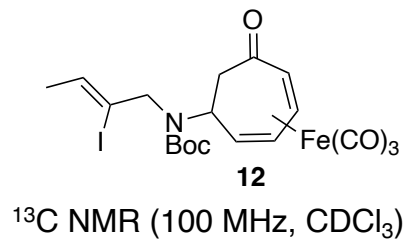

—208.0511

—202.2519

154.3452

153.7925

—132.3242

—105.9765

90.6290

90.2042

81.3653

80.8662

61.1755

60.6971

57.3562

43.5719

42.7759

—28.4183

—21.6788

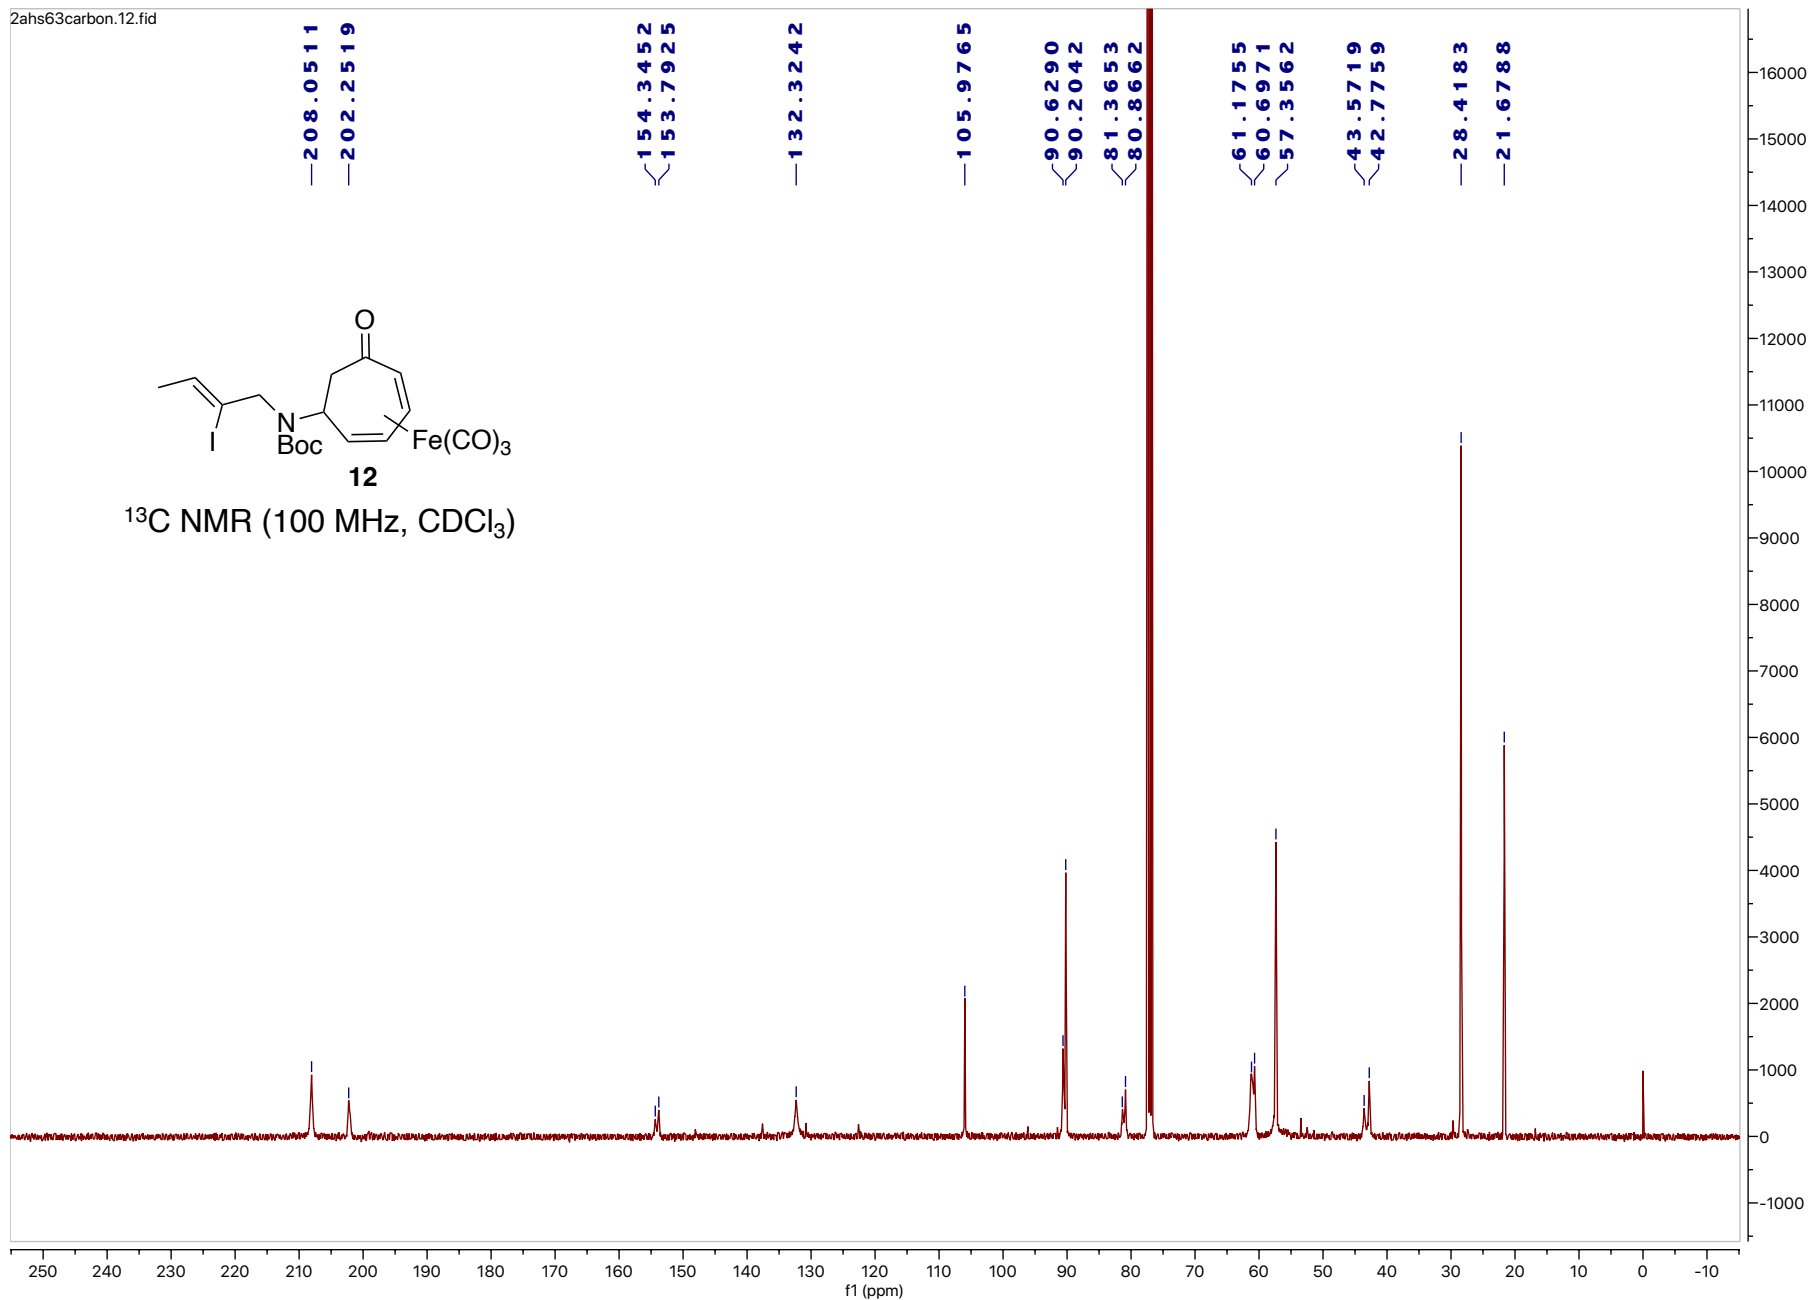

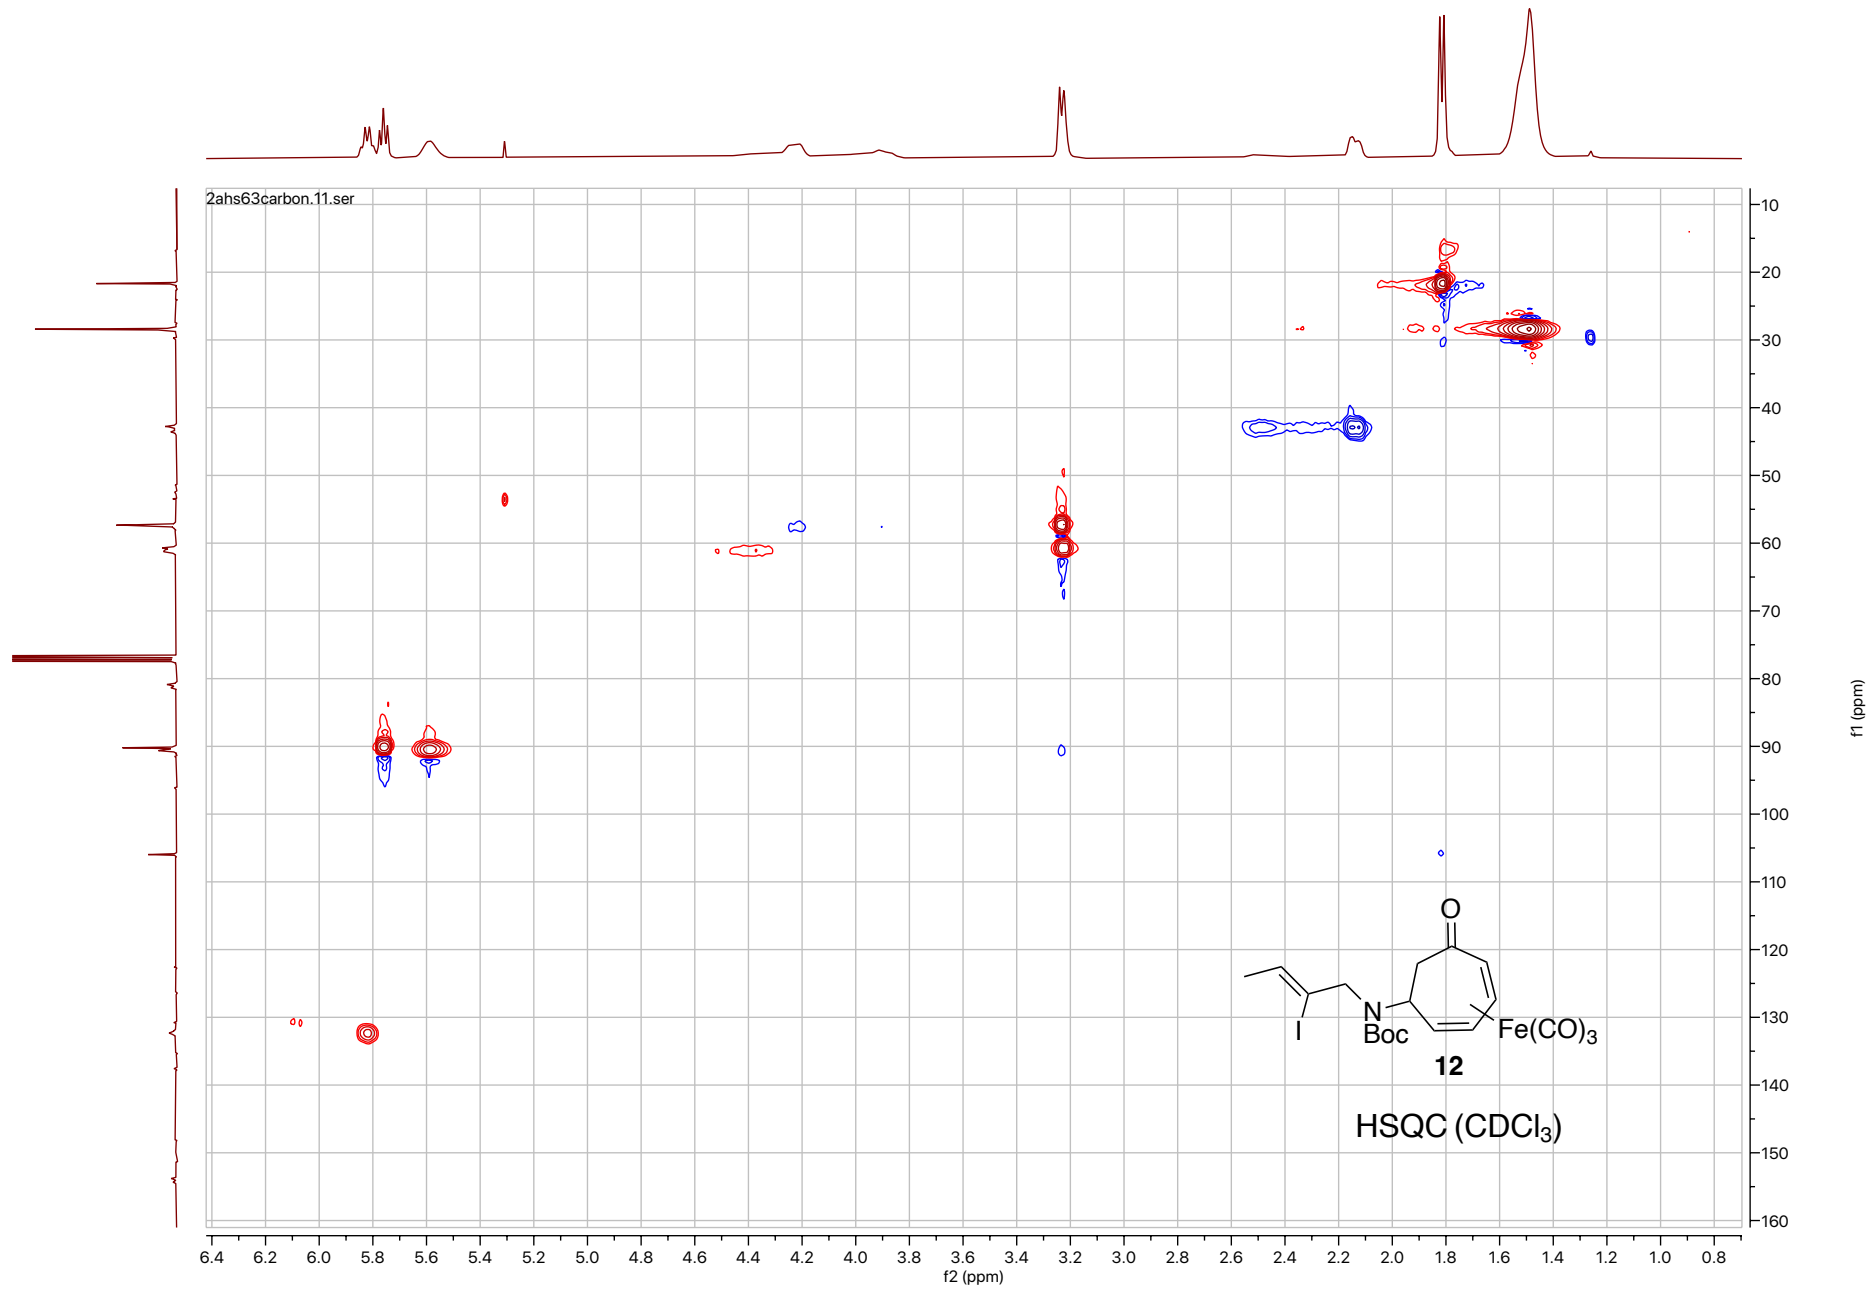

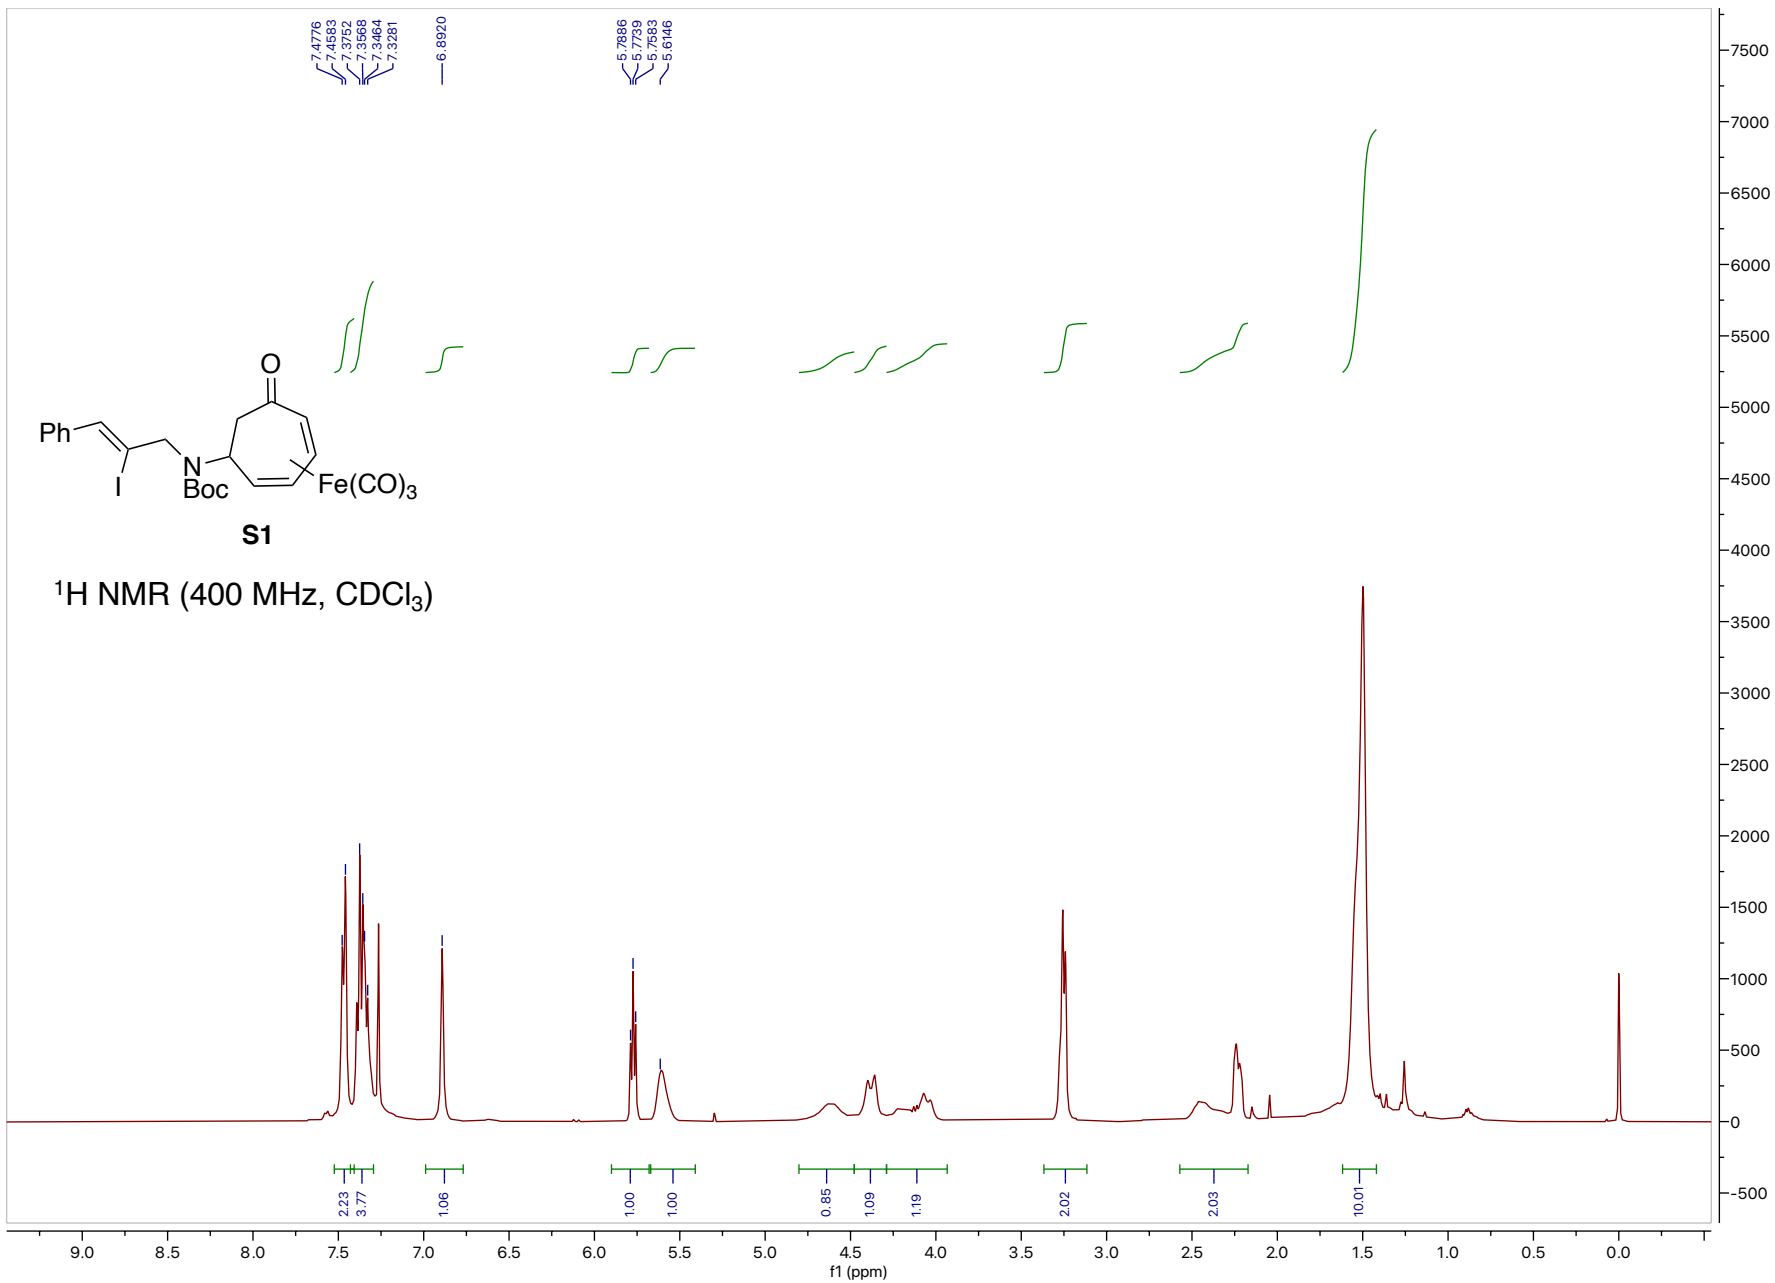

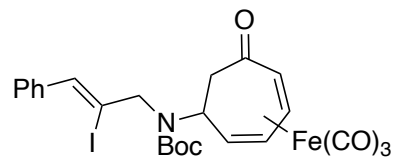

$^{13}\text{C}$  NMR (100 MHz,  $\text{CDCl}_3$ )

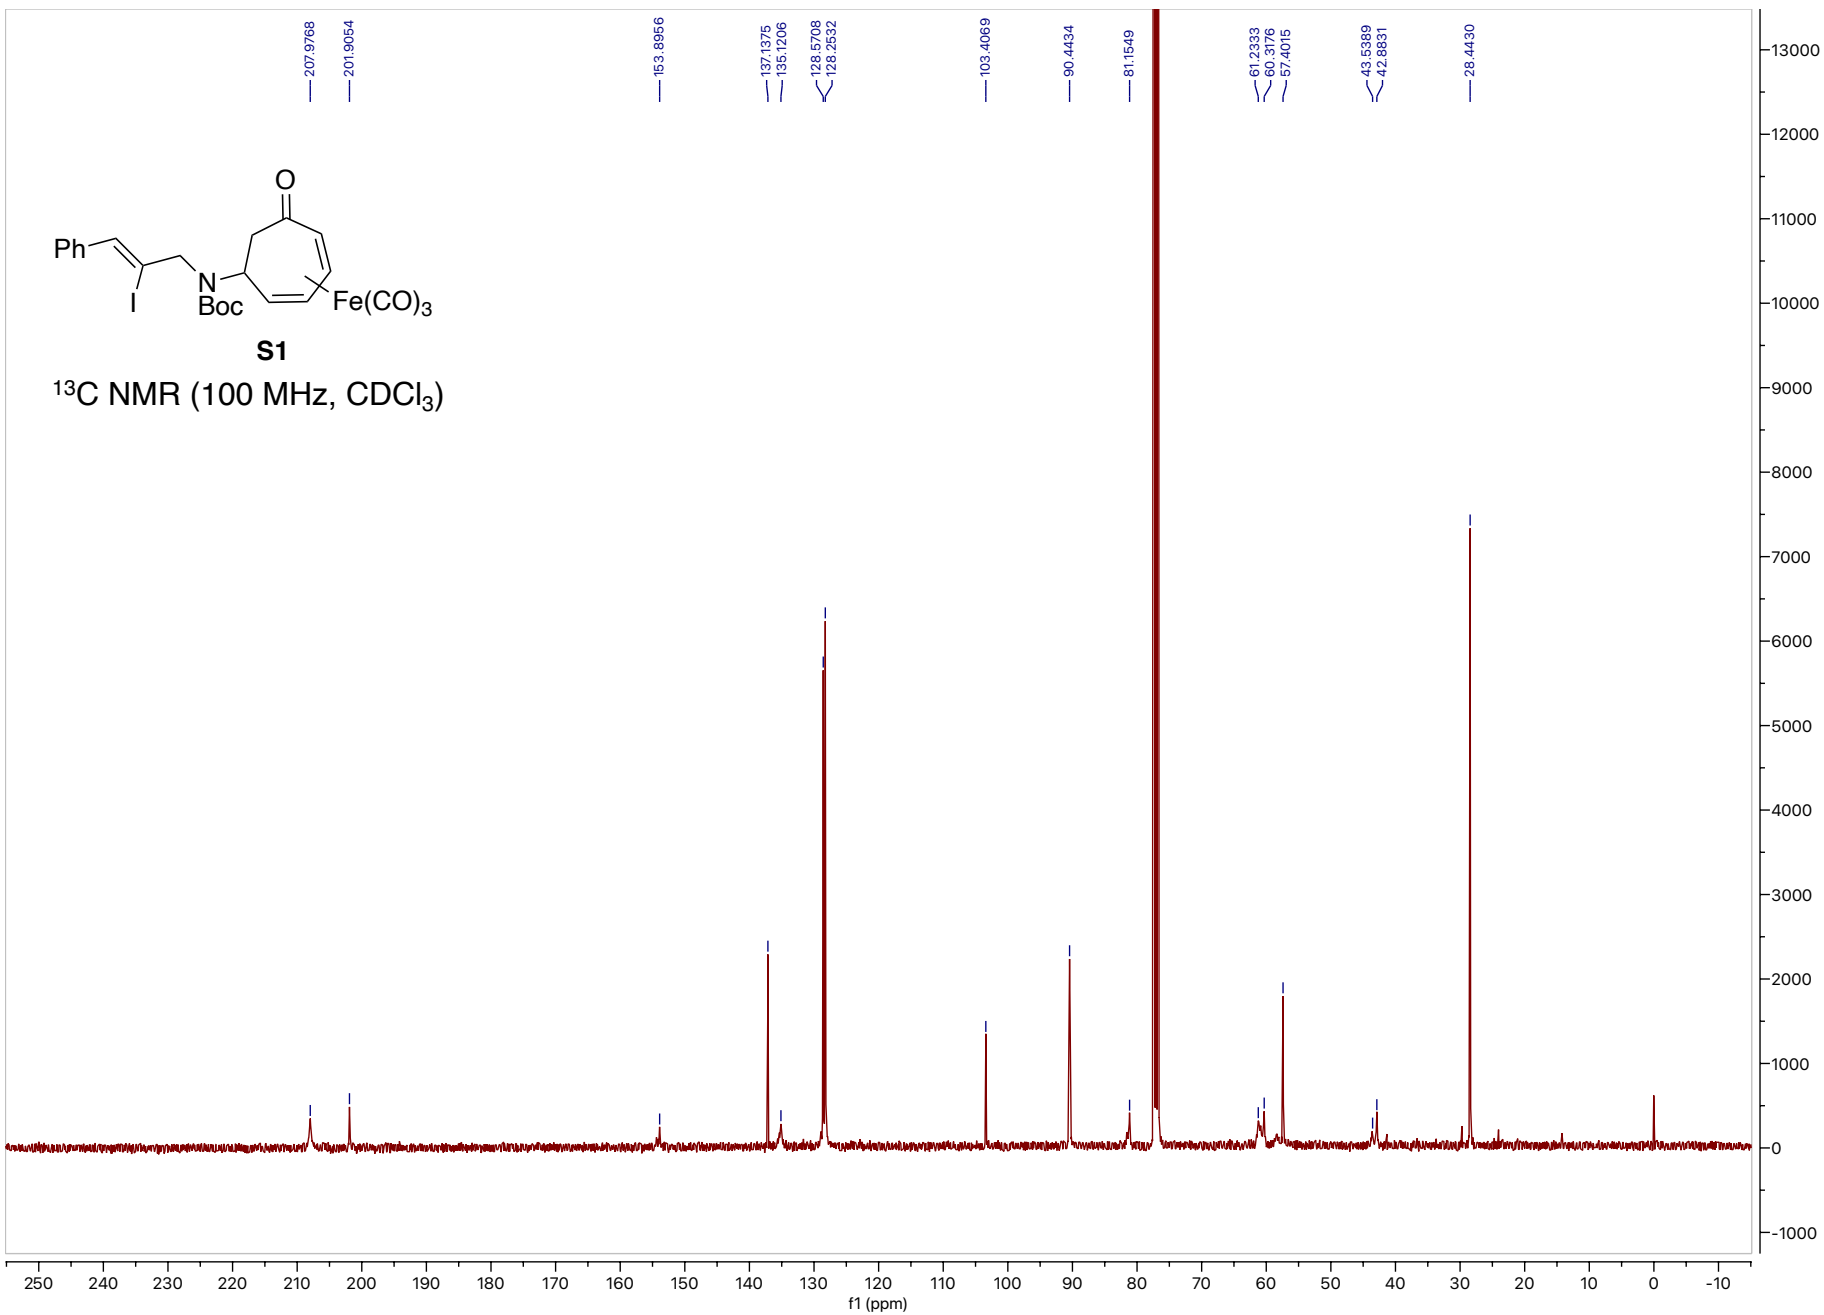



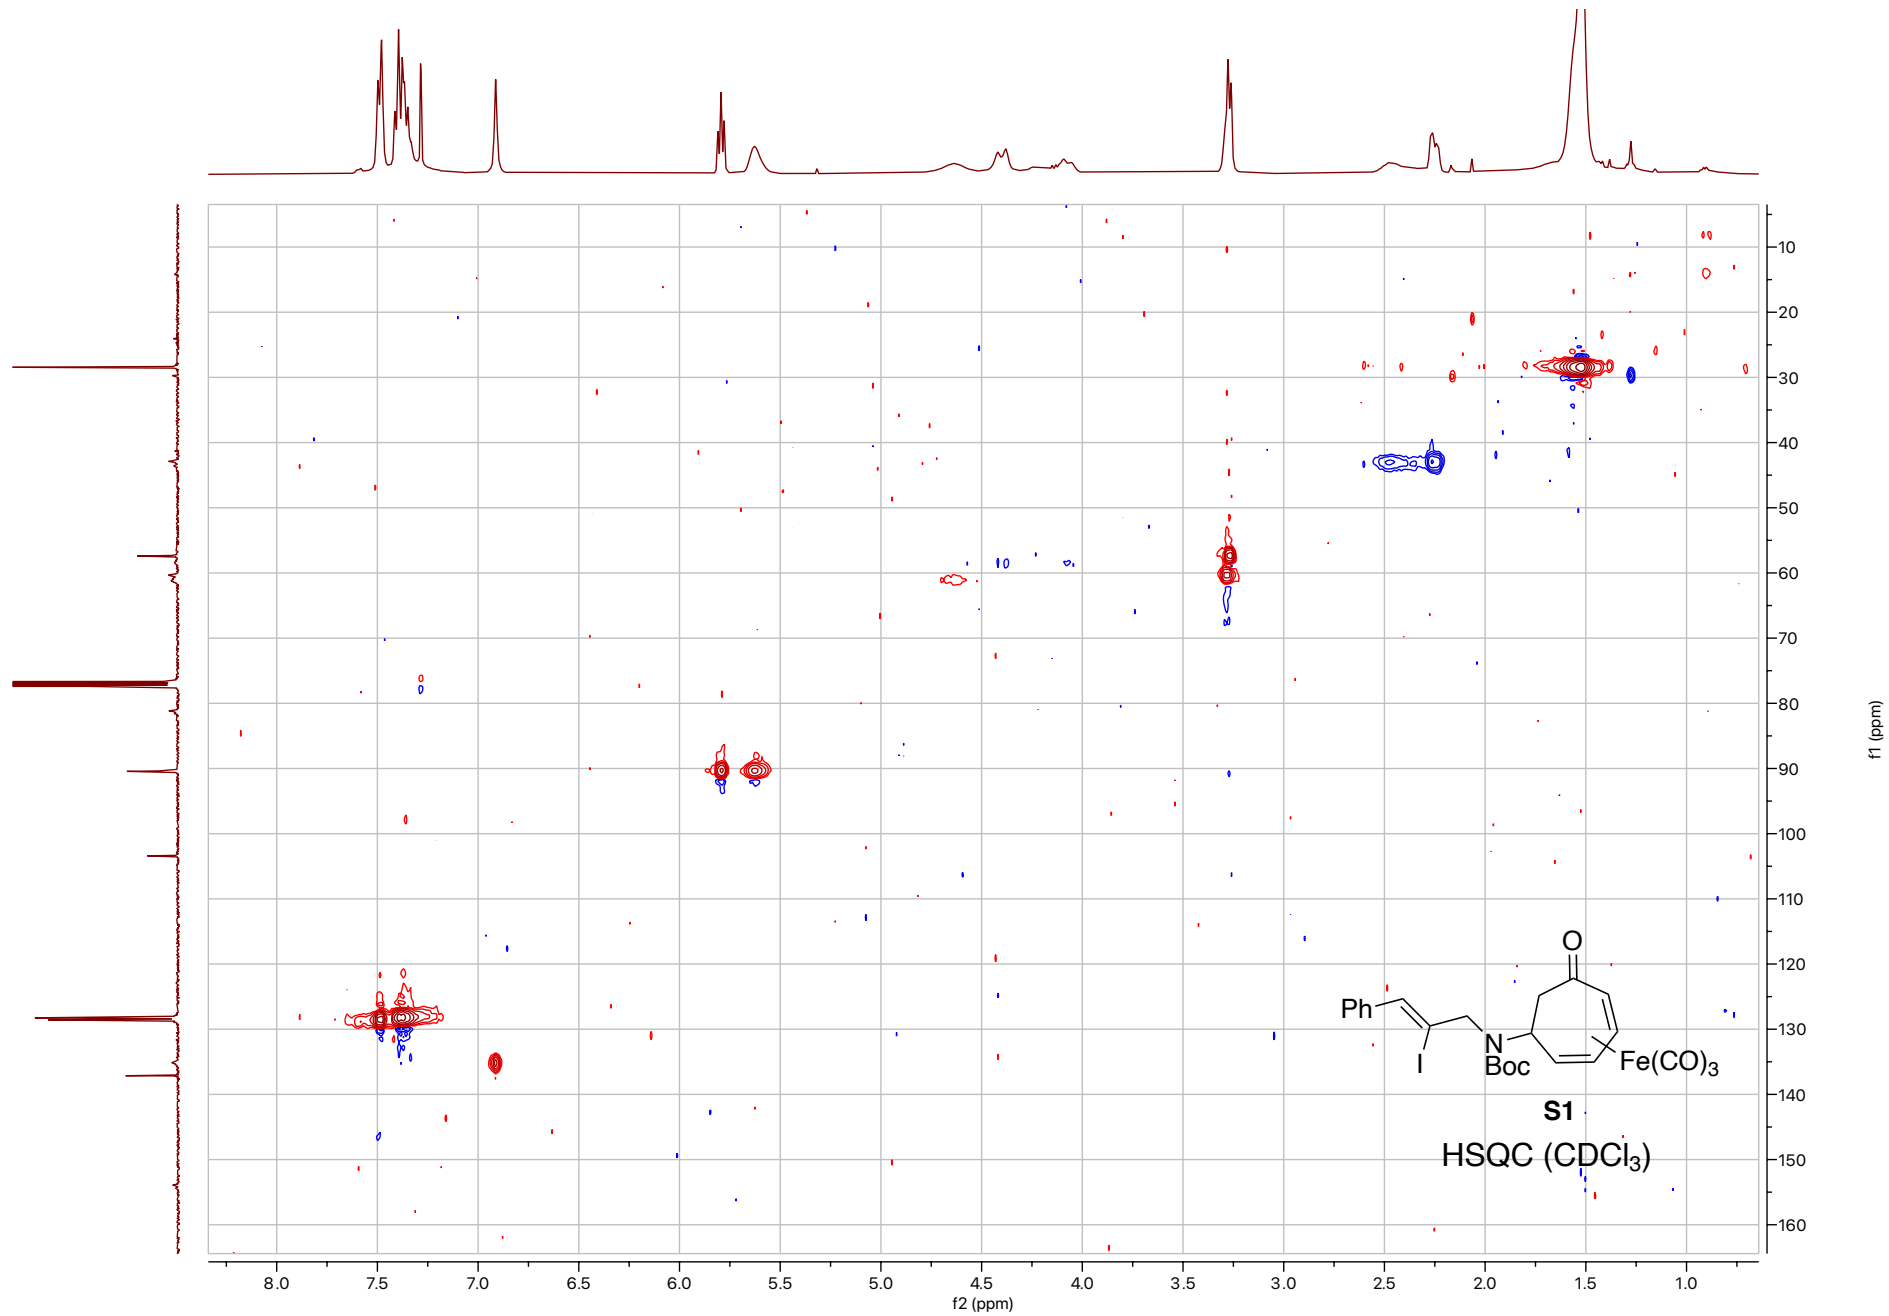

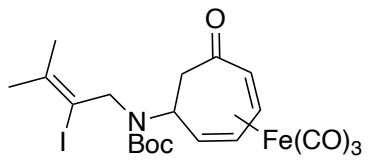

**S2**

<sup>1</sup>H NMR (400 MHz, CDCl<sub>3</sub>)

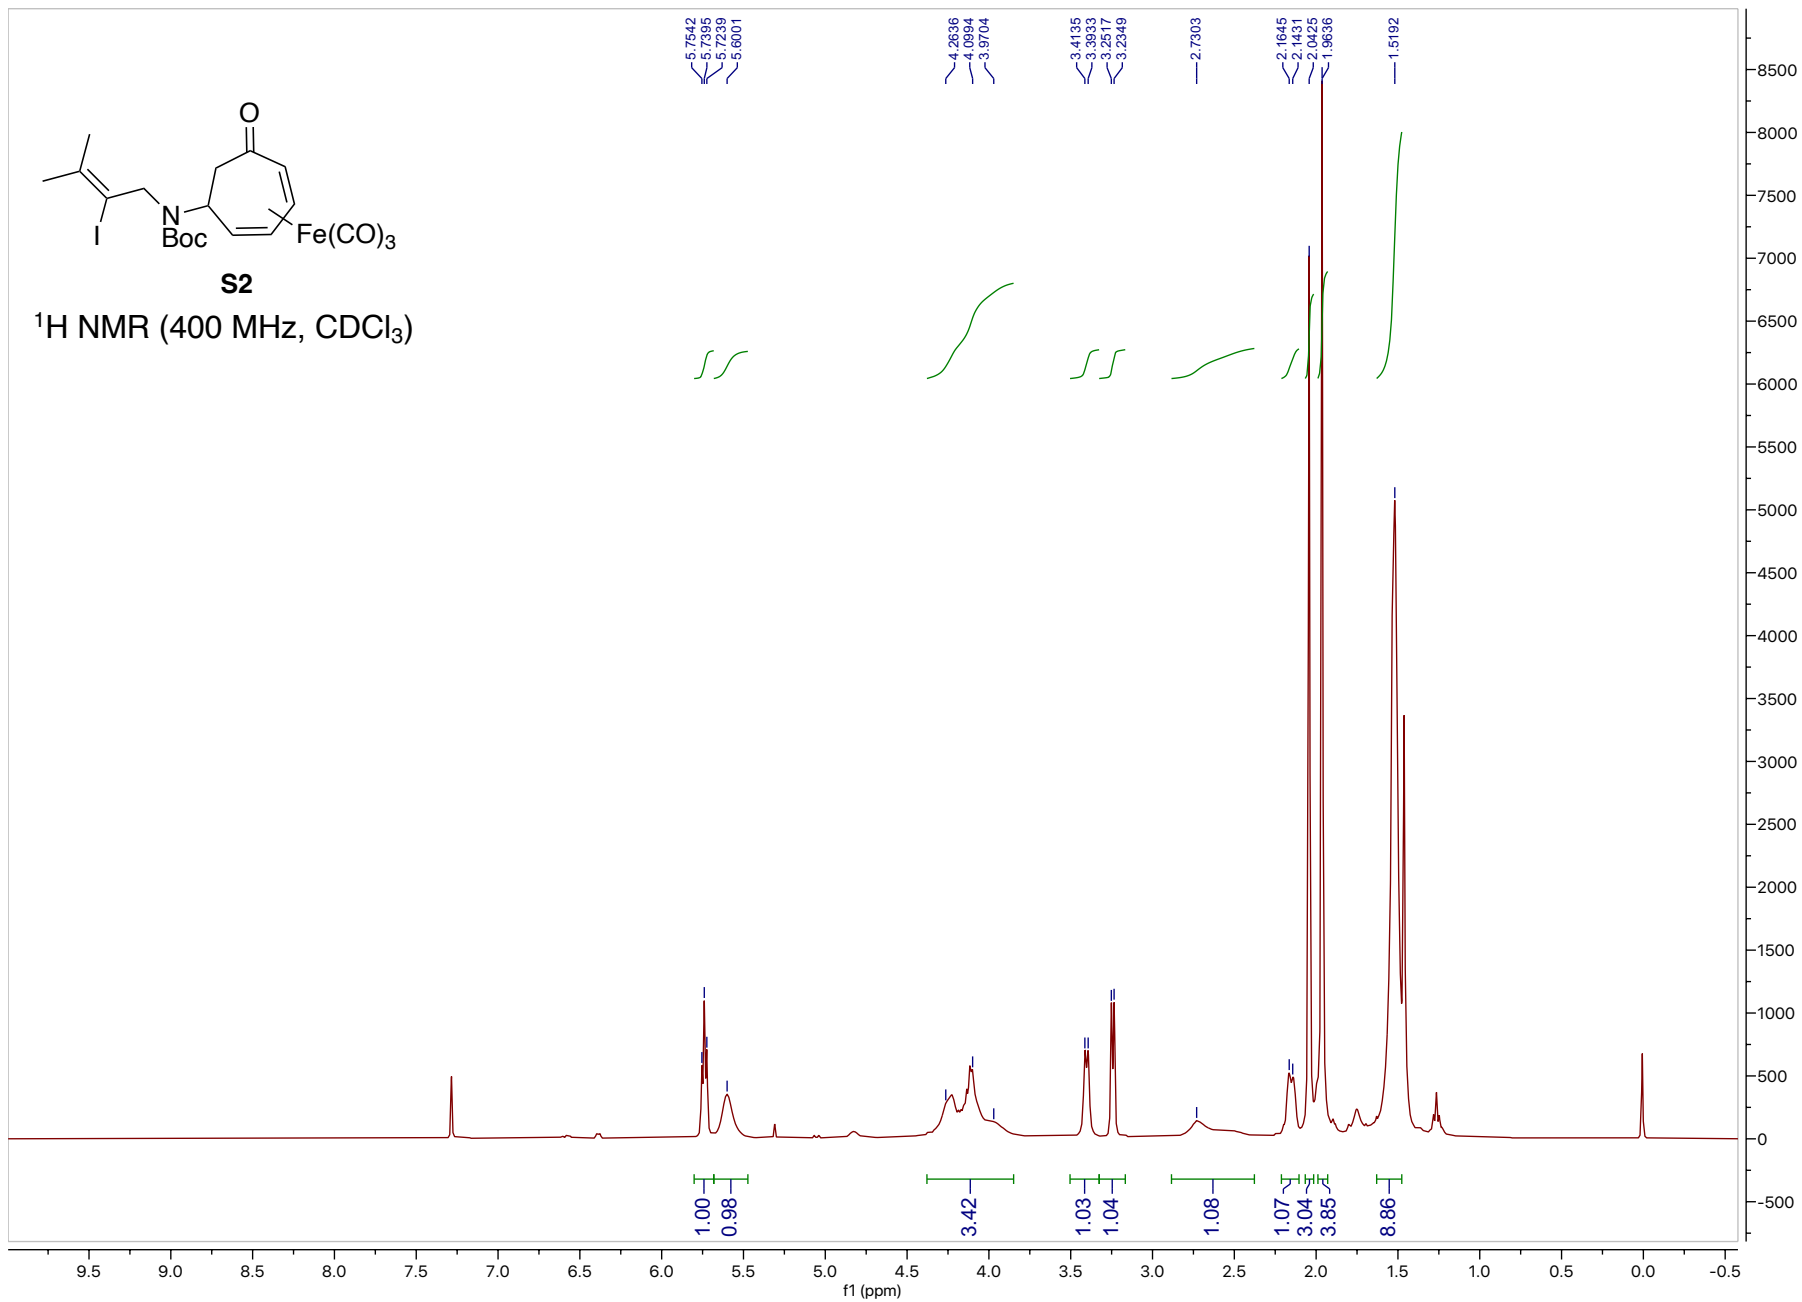

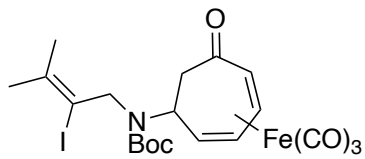

S2

$^{13}\text{C}$  NMR (100 MHz,  $\text{CDCl}_3$ )

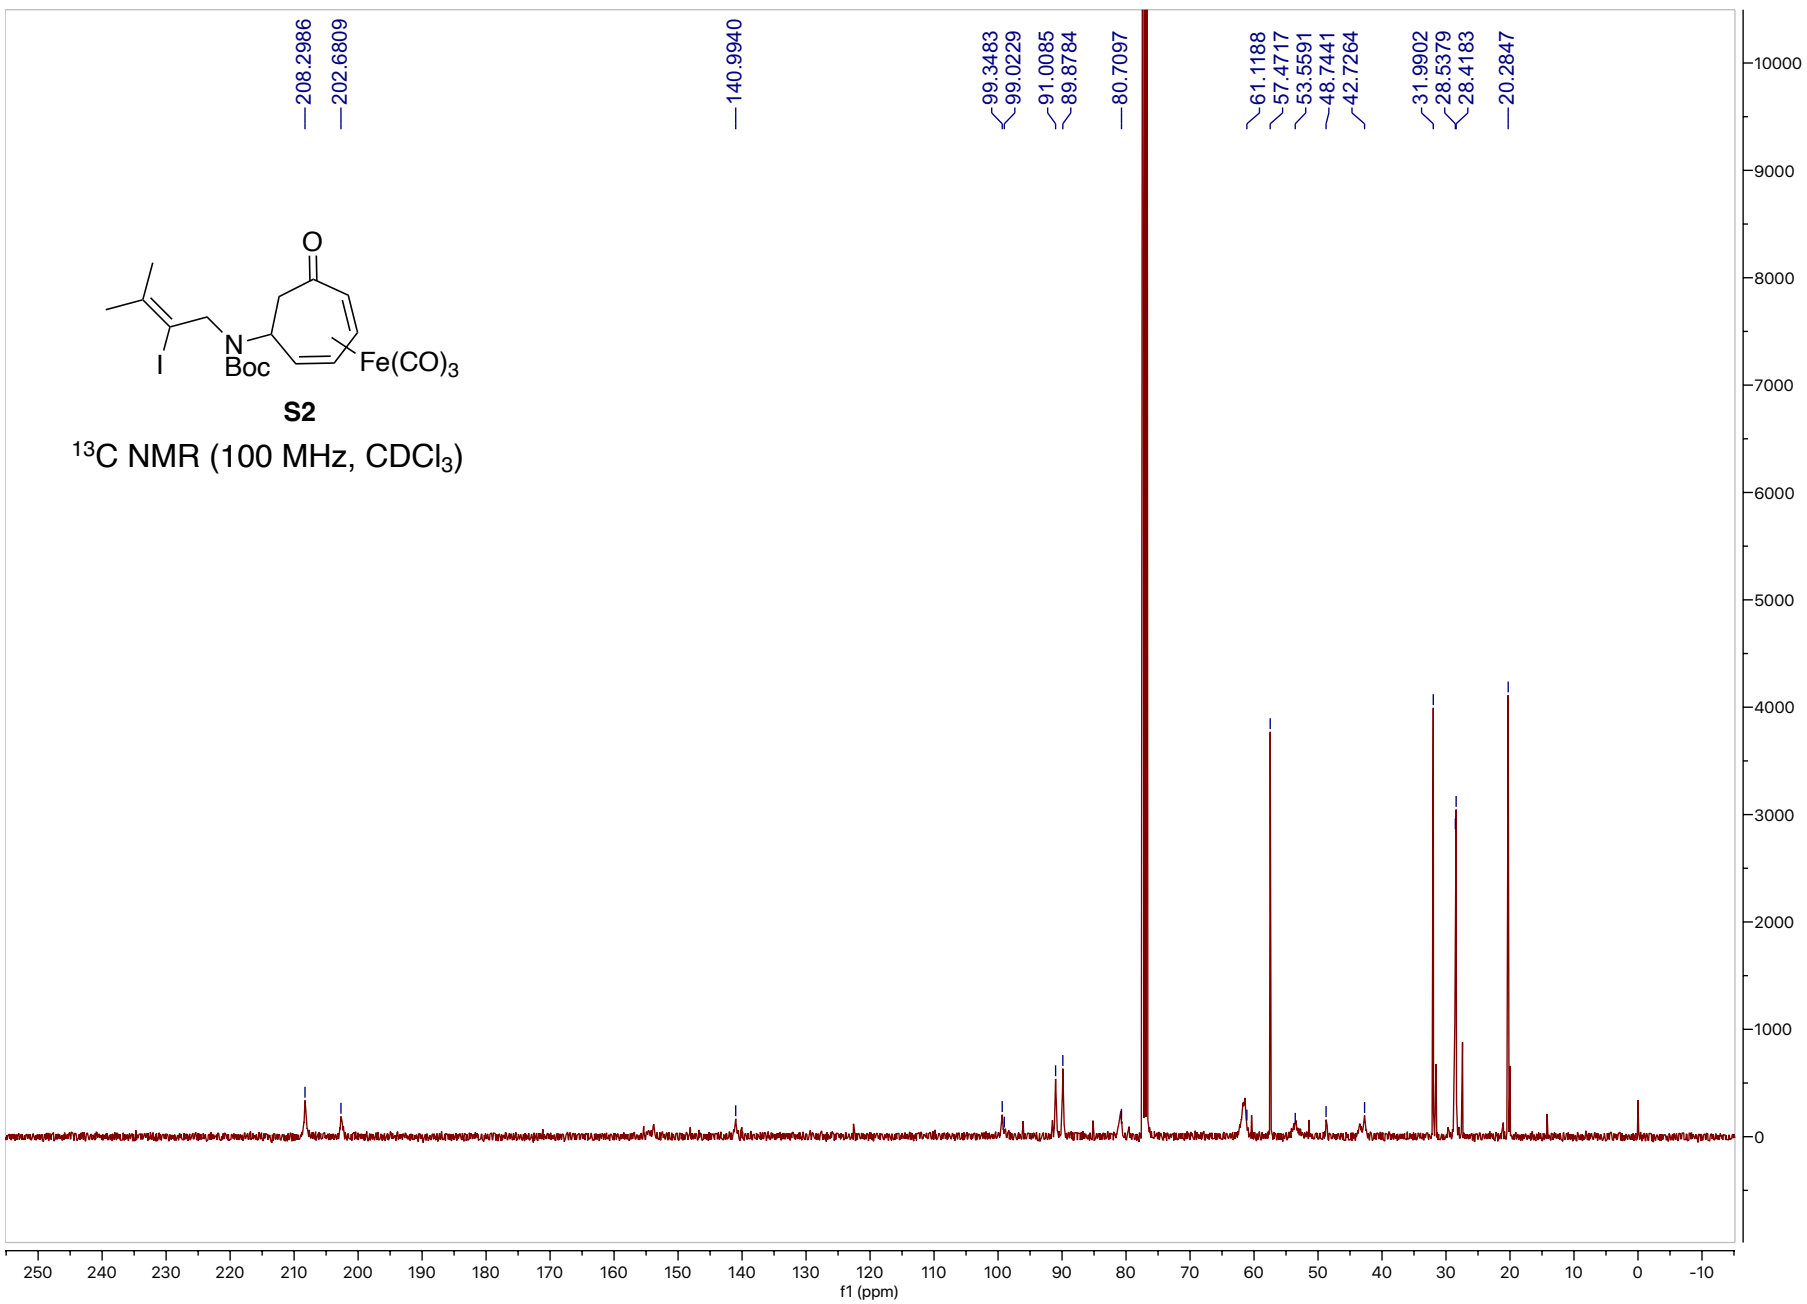

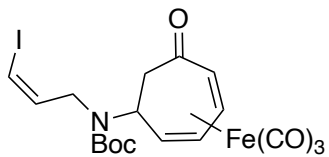

S3

$^1\text{H NMR}$  (400 MHz,  $\text{CDCl}_3$ )

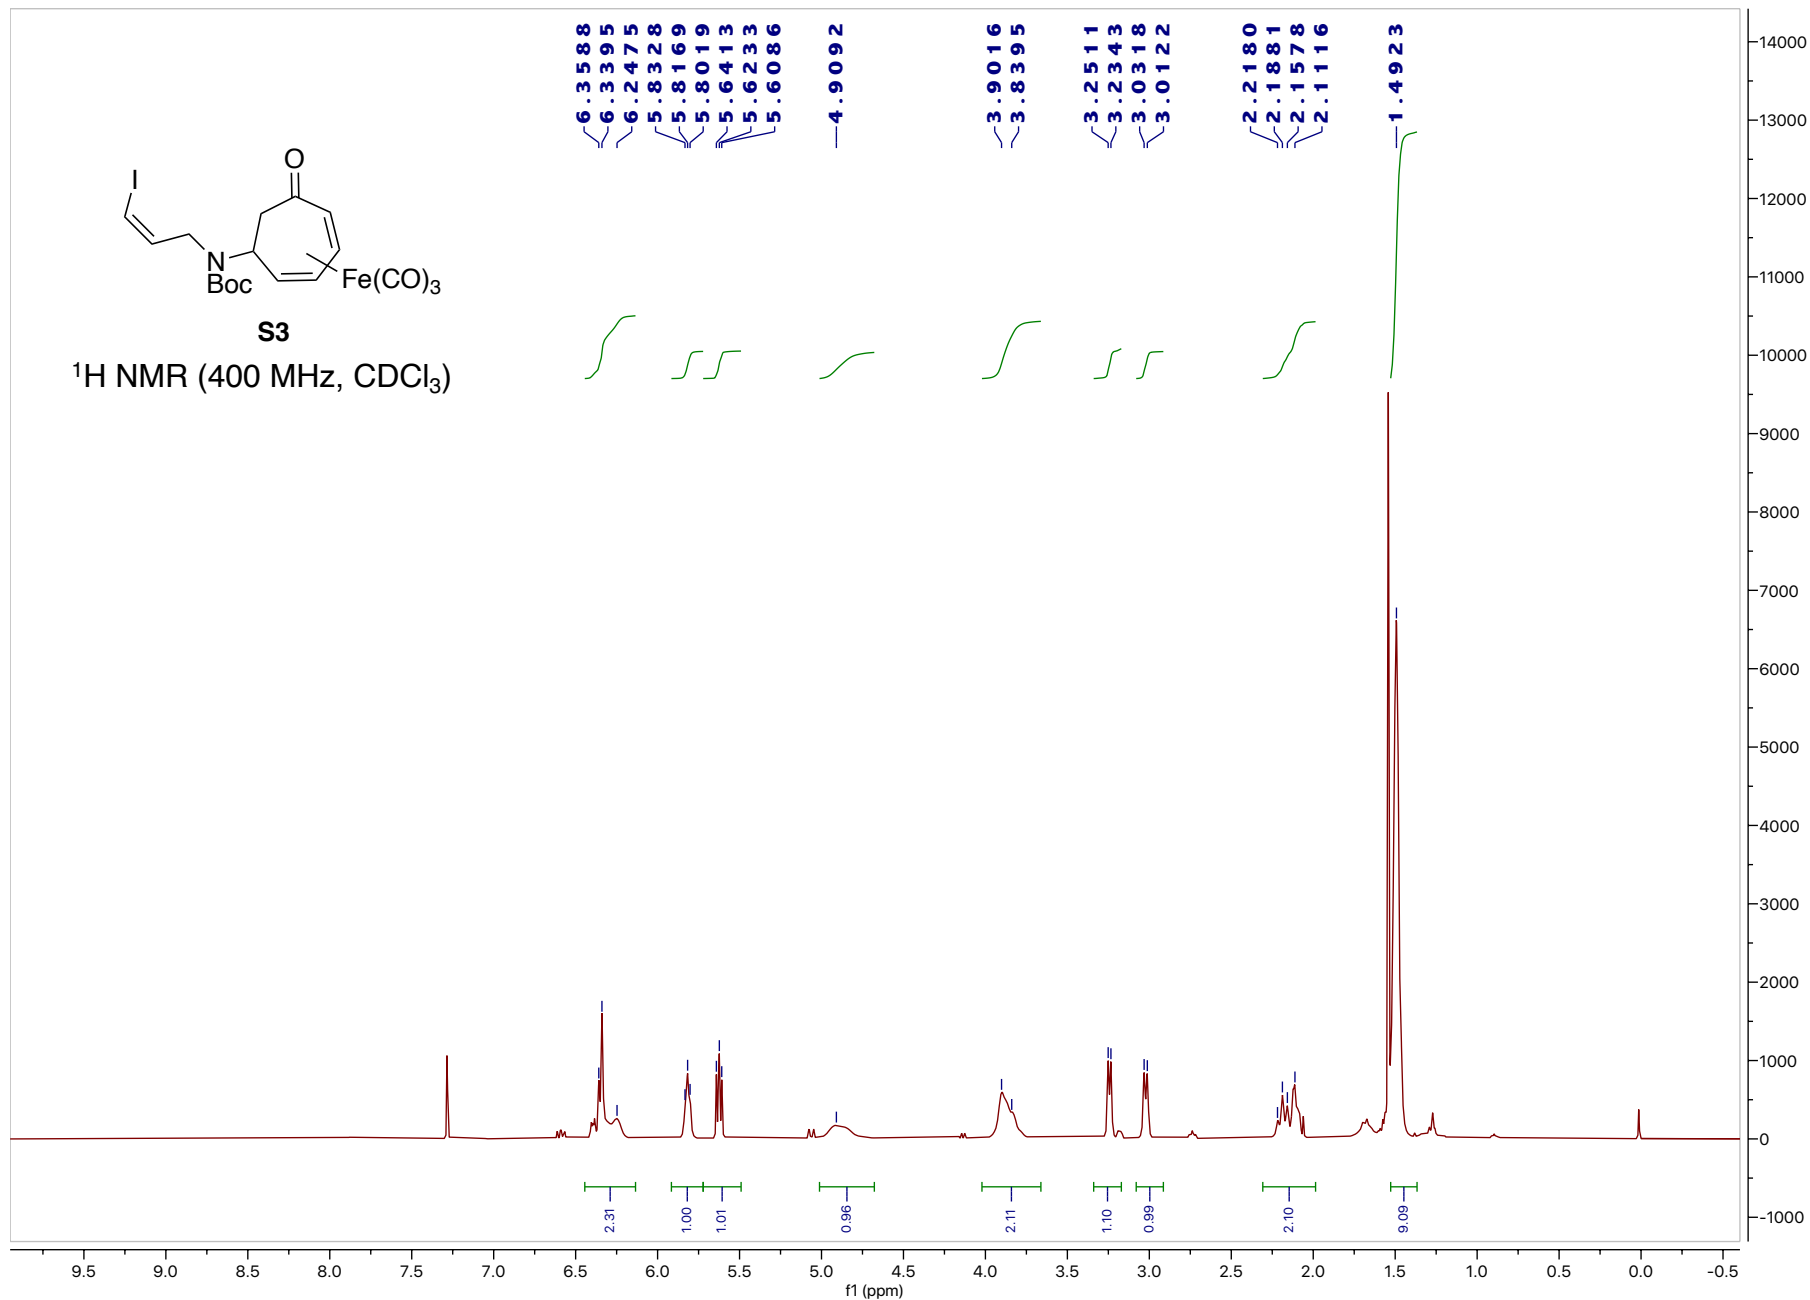

207.9161

201.4653

164.0985

138.8289

90.6668

90.2326

82.6215

81.2459

80.8811

60.3976

59.9488

57.3254

48.2038

43.8218

43.1030

28.3969

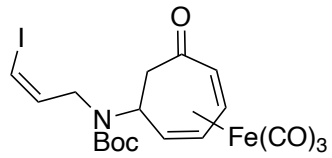

**S3**

<sup>13</sup>C NMR (100 MHz, CDCl<sub>3</sub>)

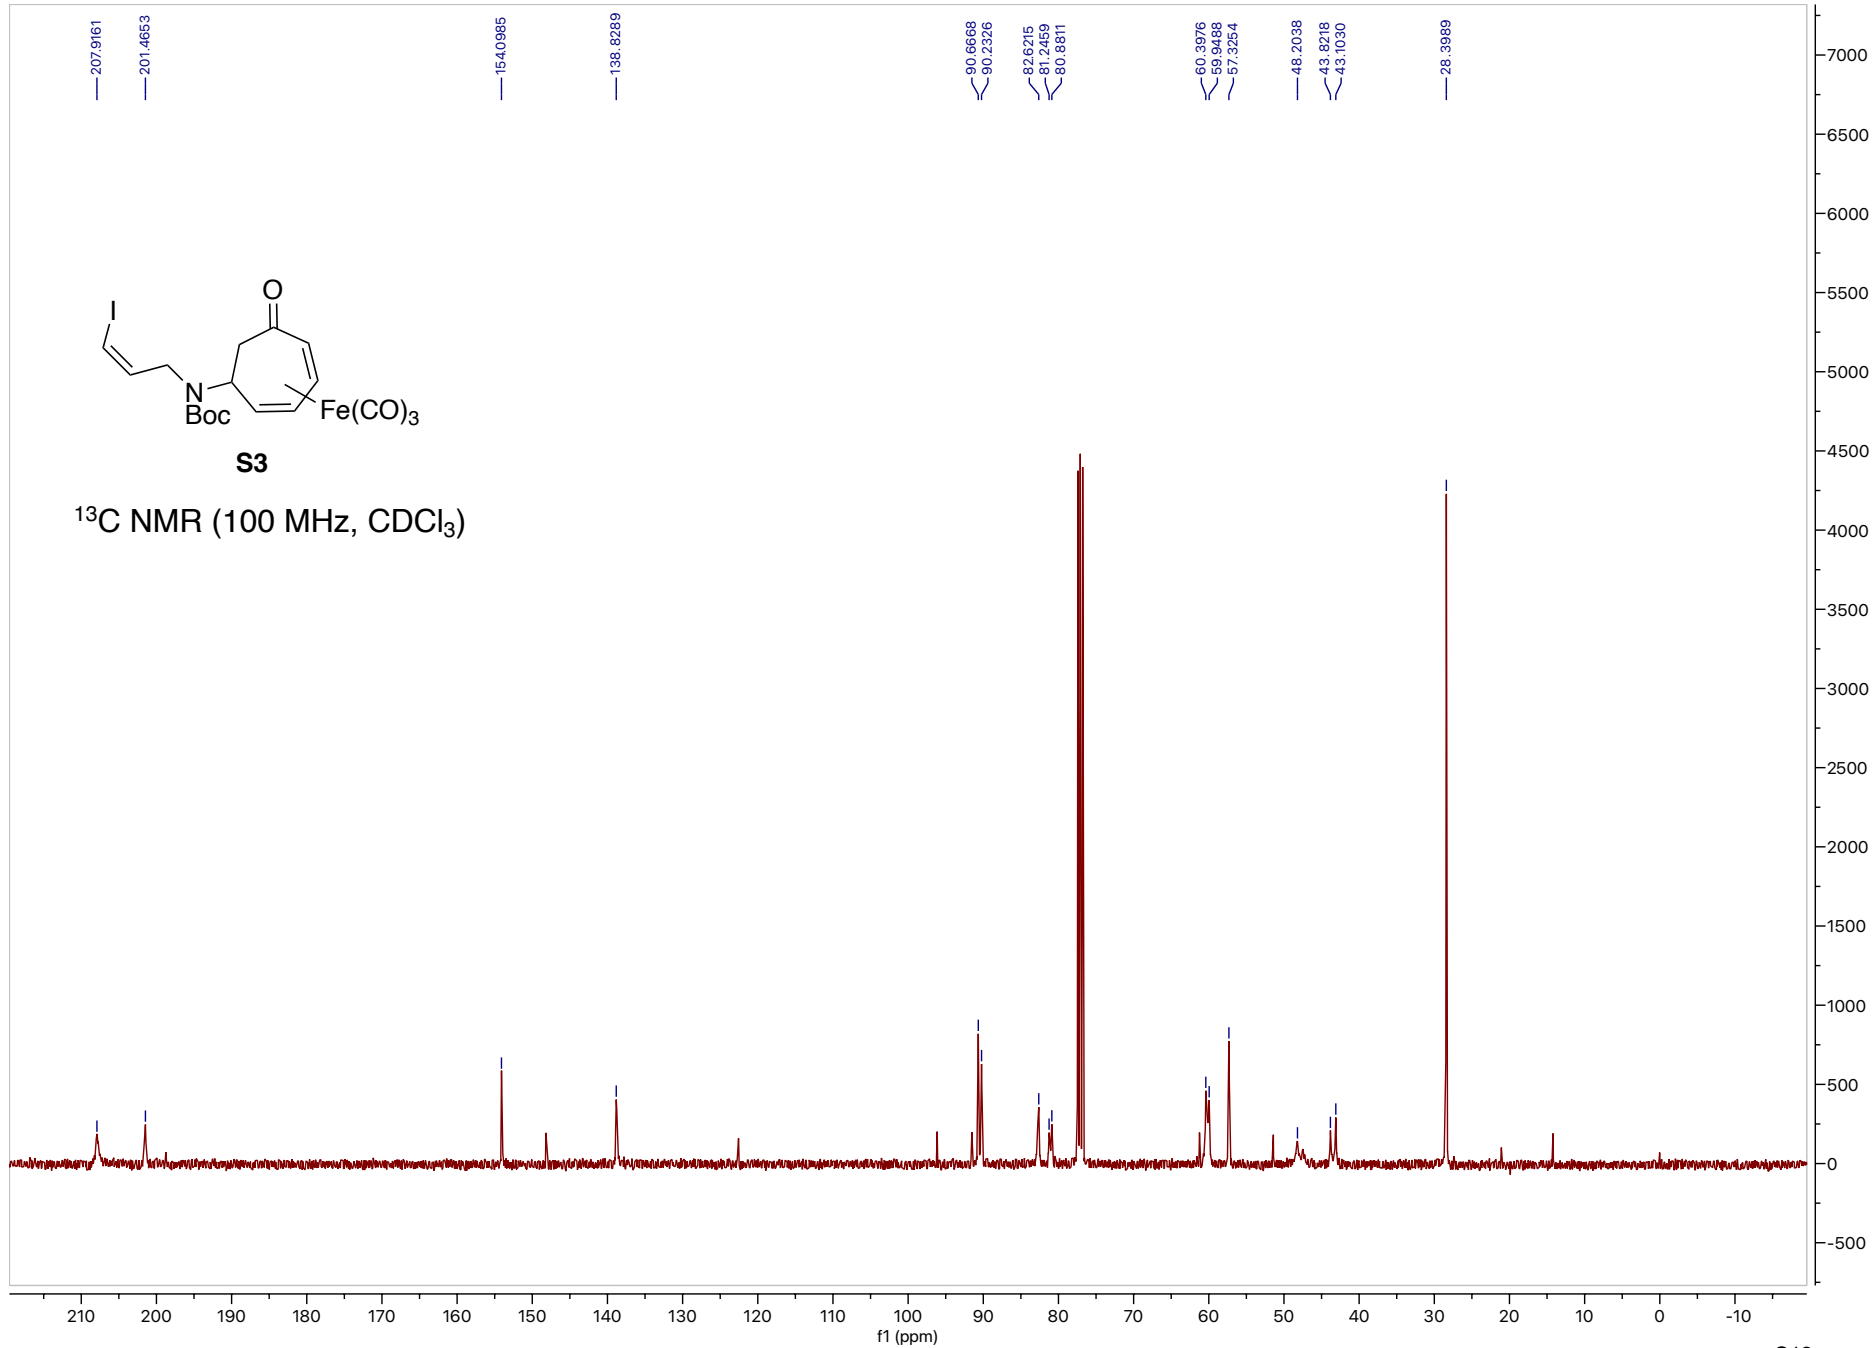

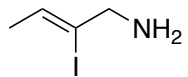

$^1\text{H}$  NMR (400 MHz,  $\text{CDCl}_3$ )

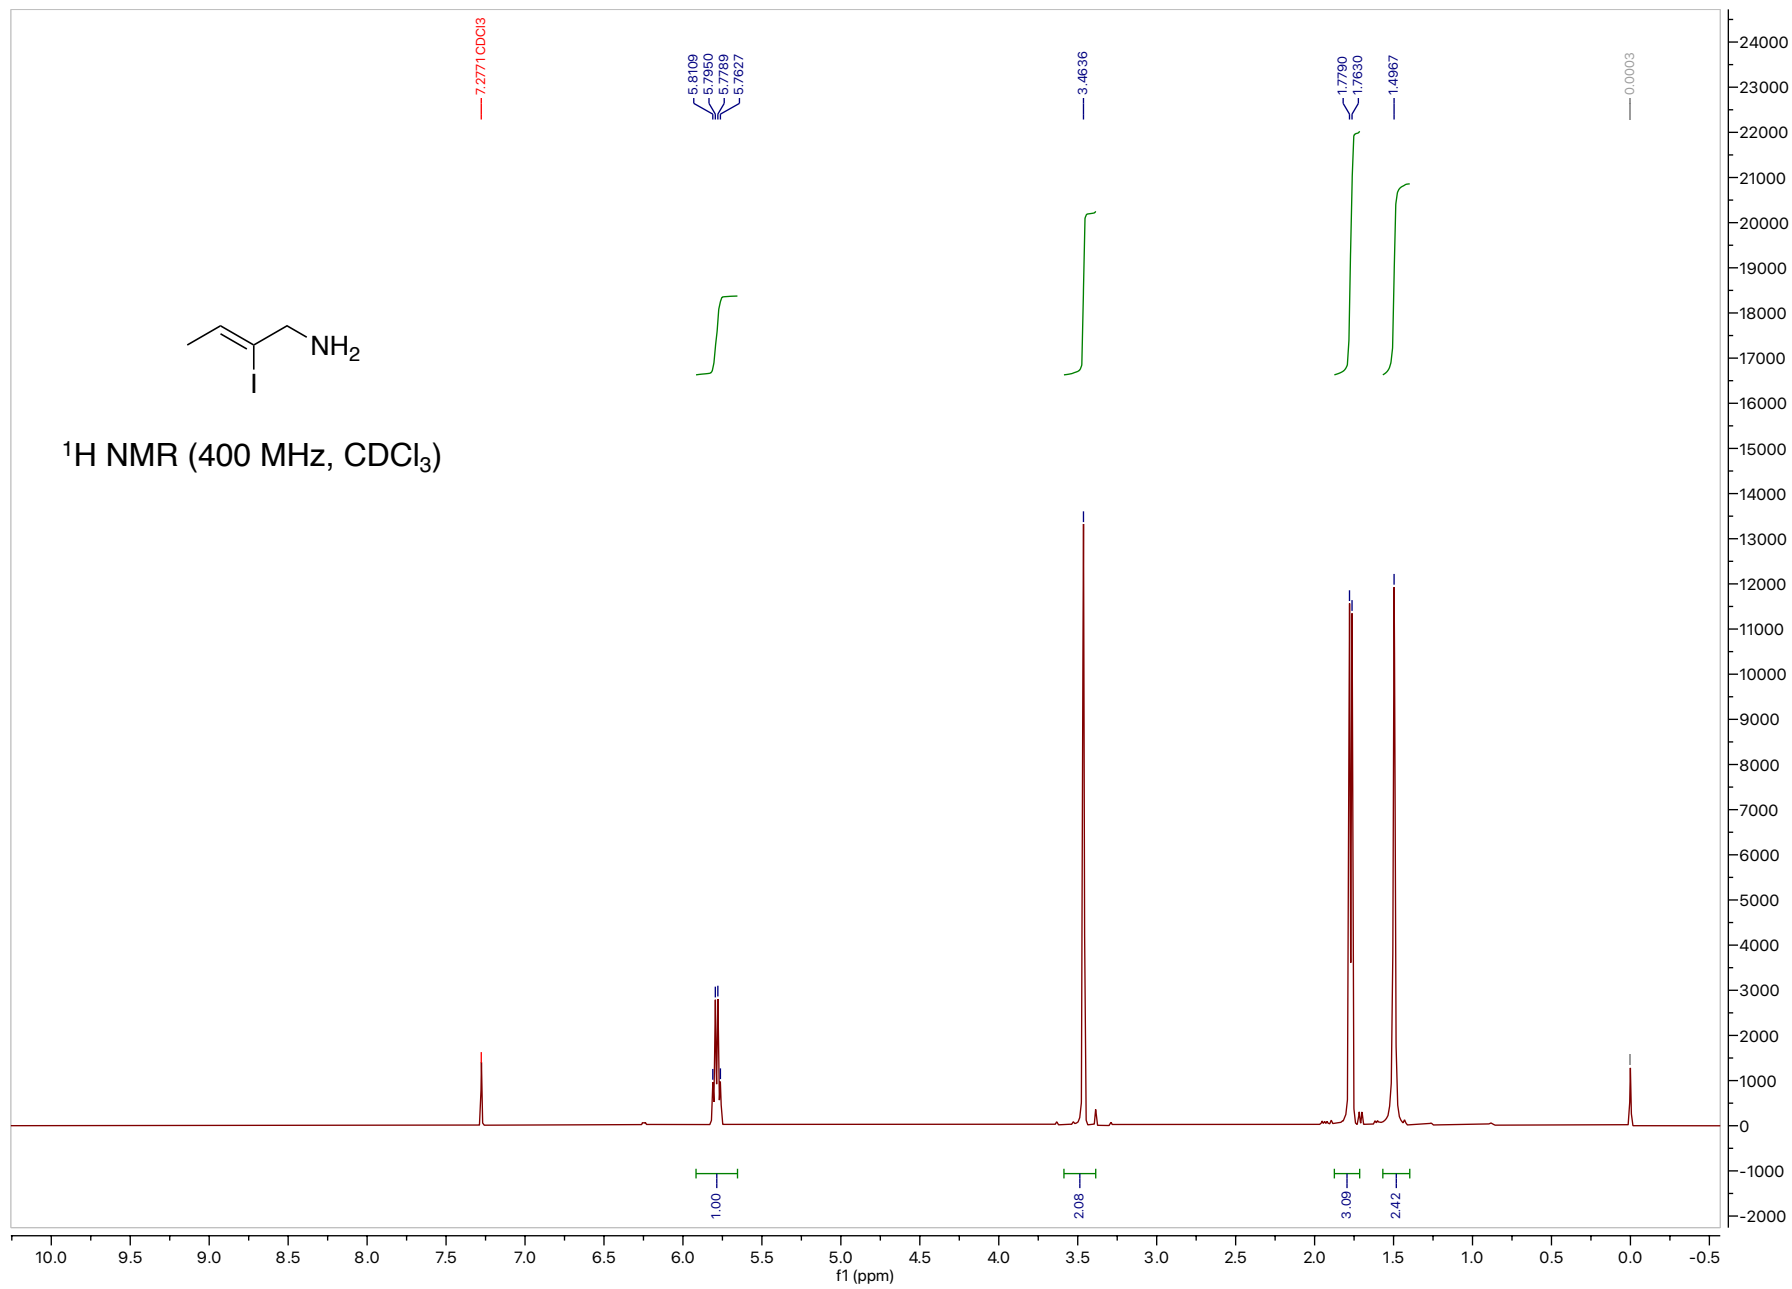

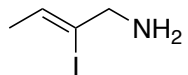

$^{13}\text{C}$  NMR (100 MHz,  $\text{CDCl}_3$ )

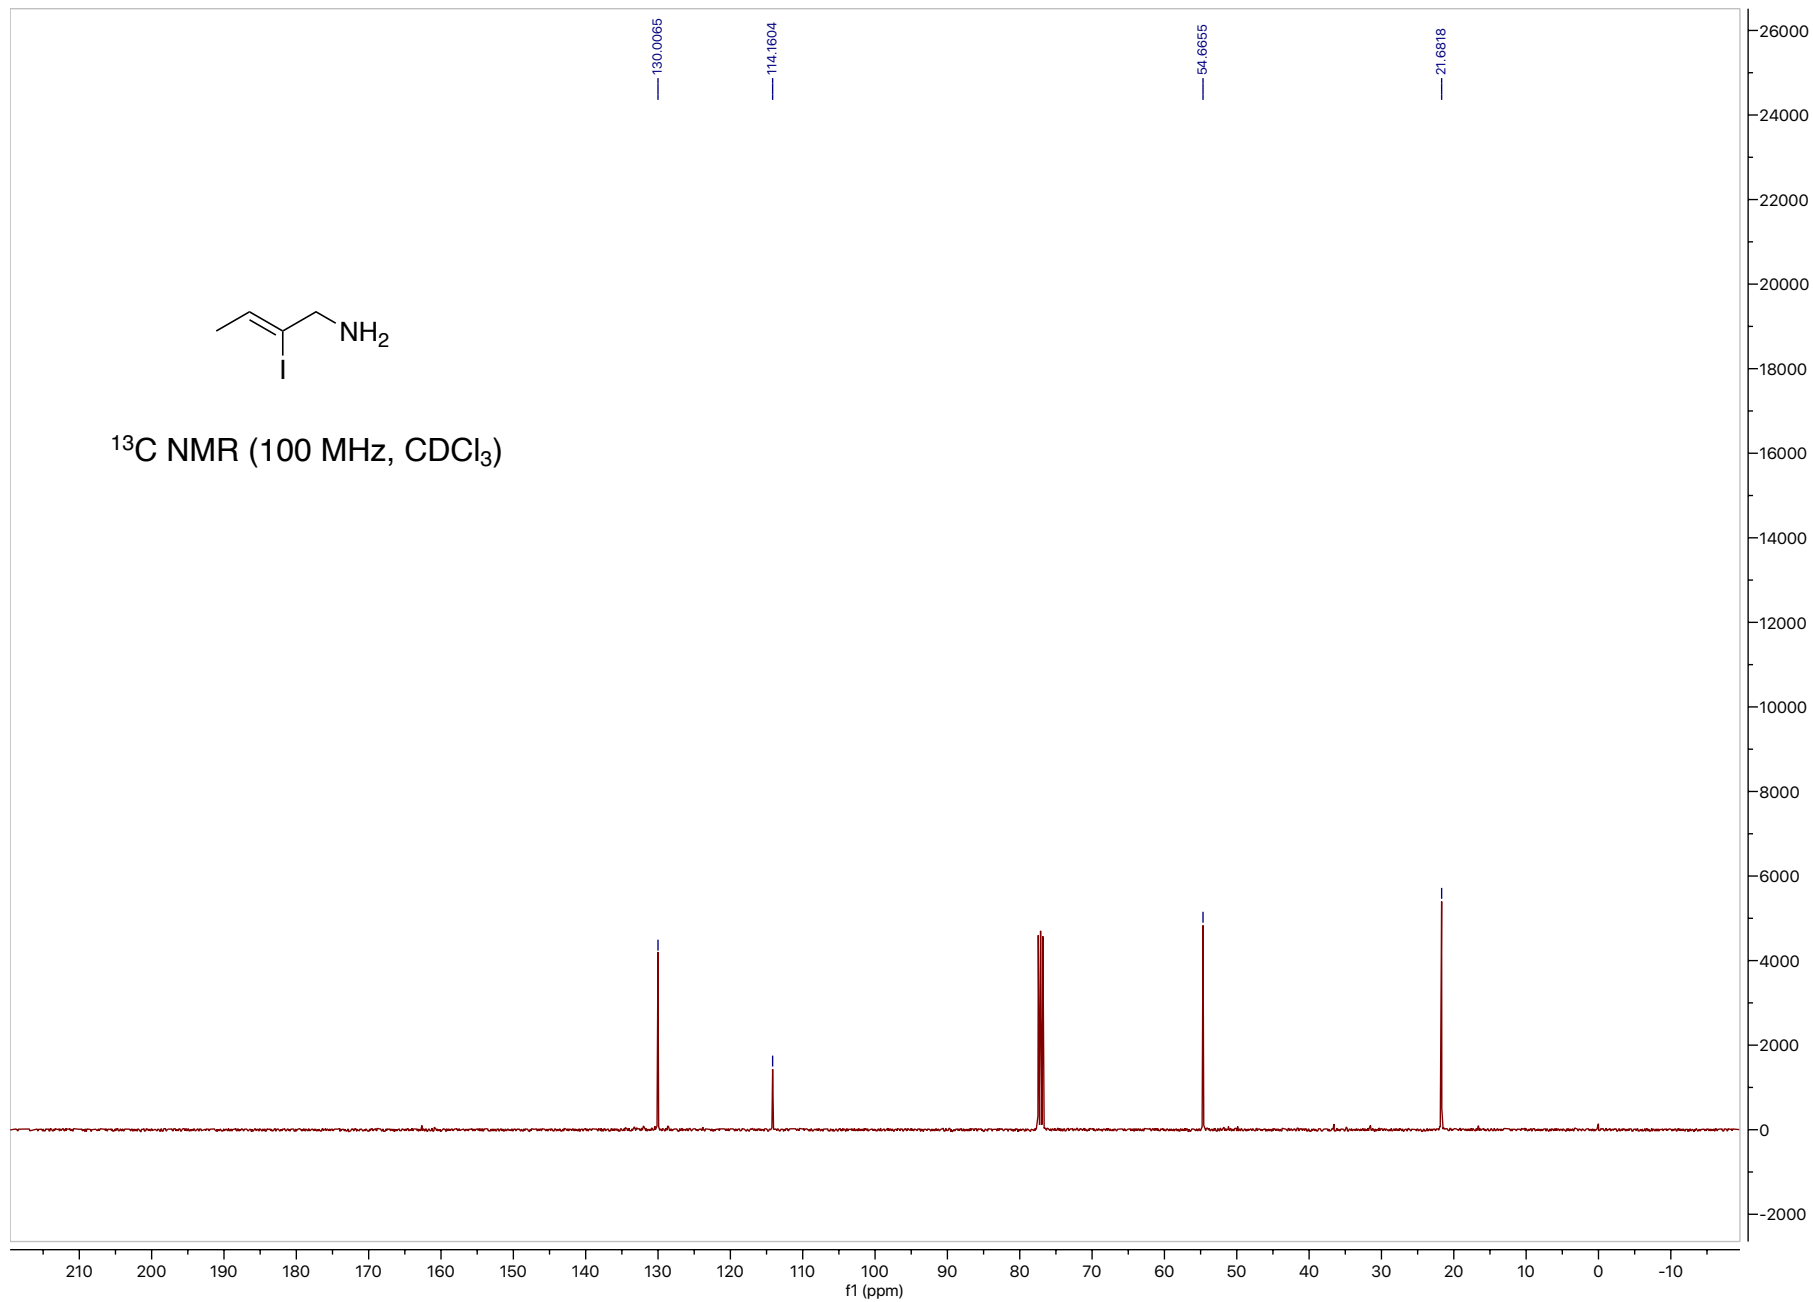

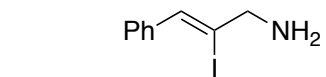

$^1\text{H}$  NMR (400 MHz,  $\text{CDCl}_3$ )

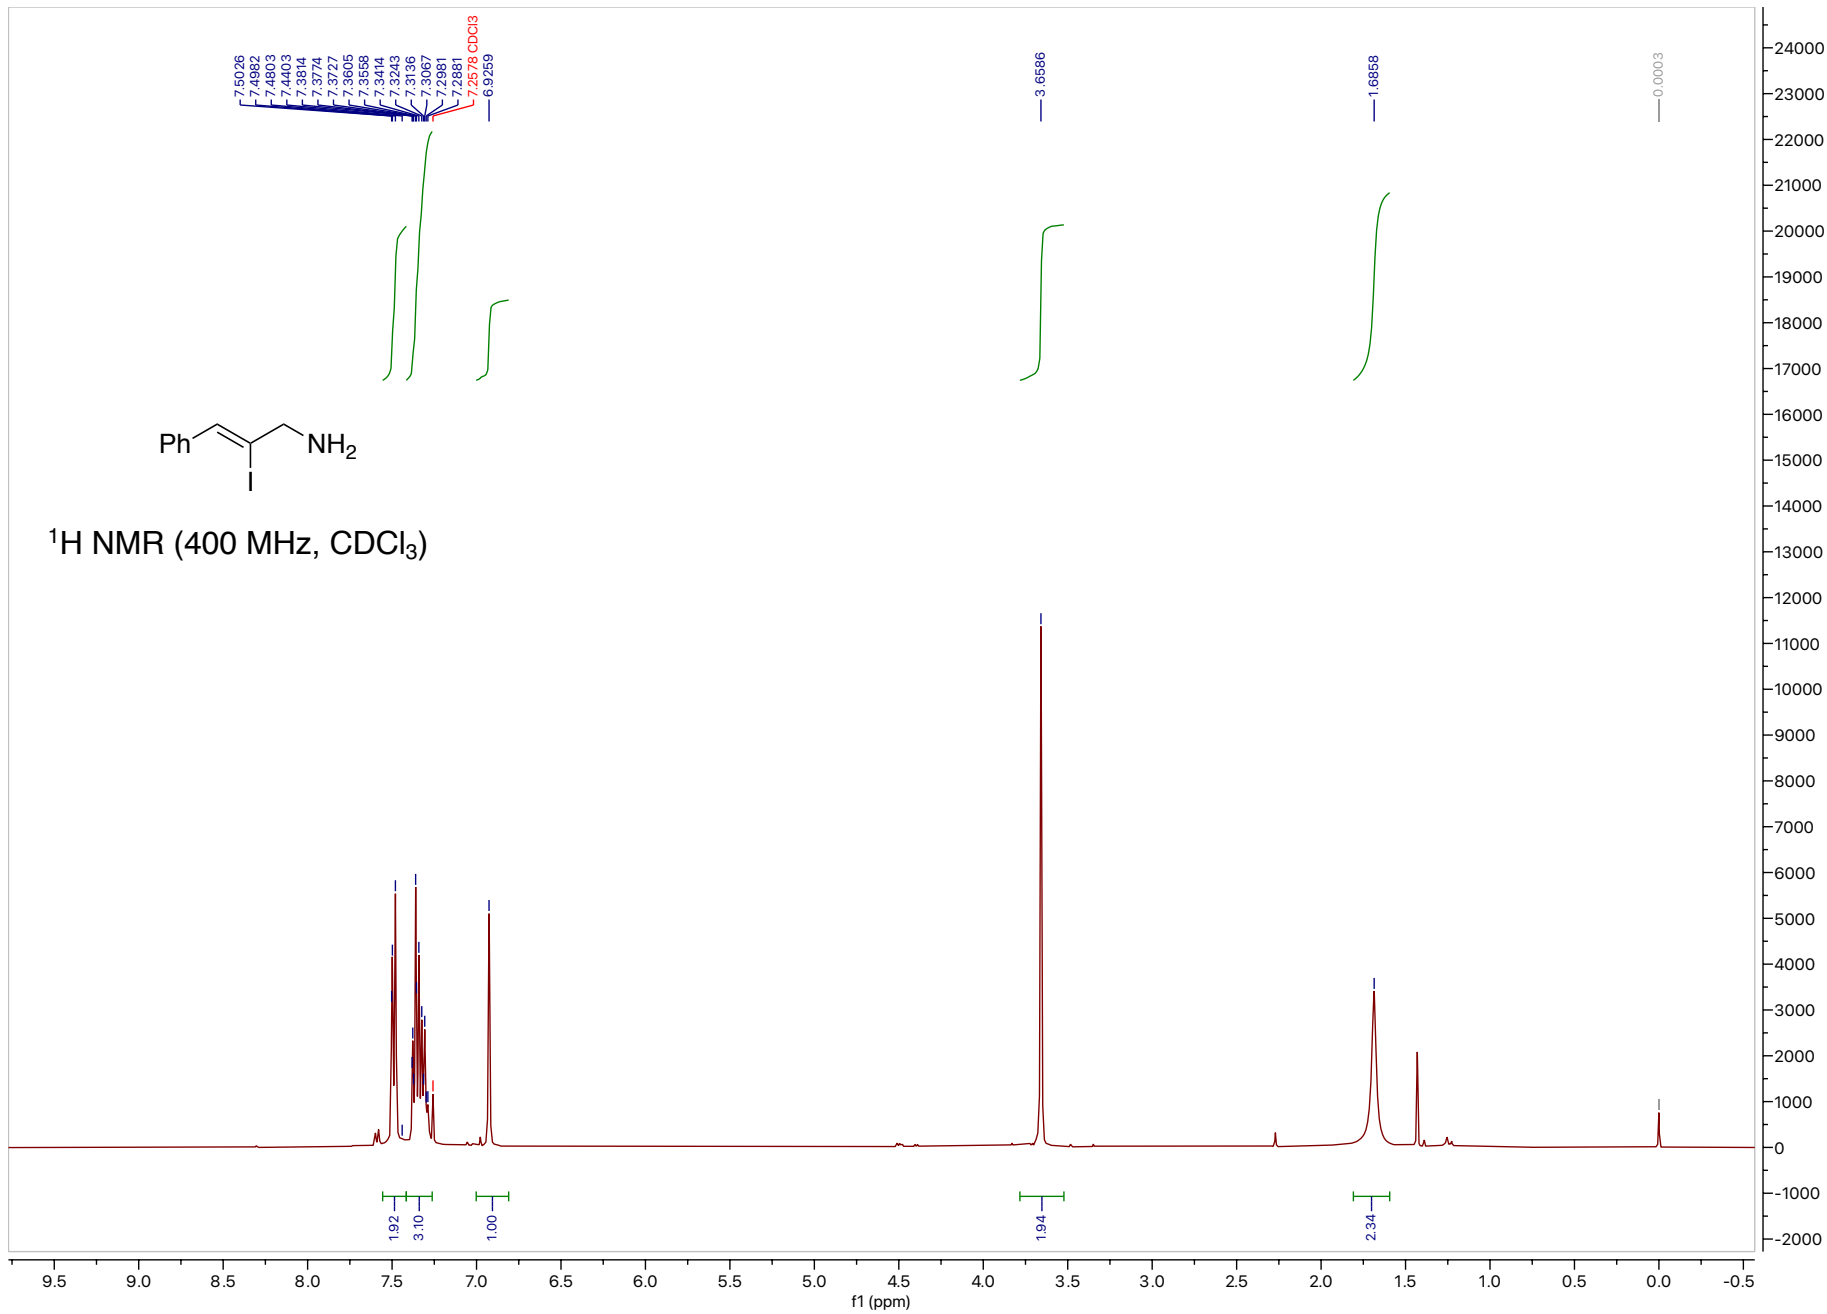



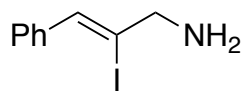

$^{13}\text{C}$  NMR (100 MHz,  $\text{CDCl}_3$ )

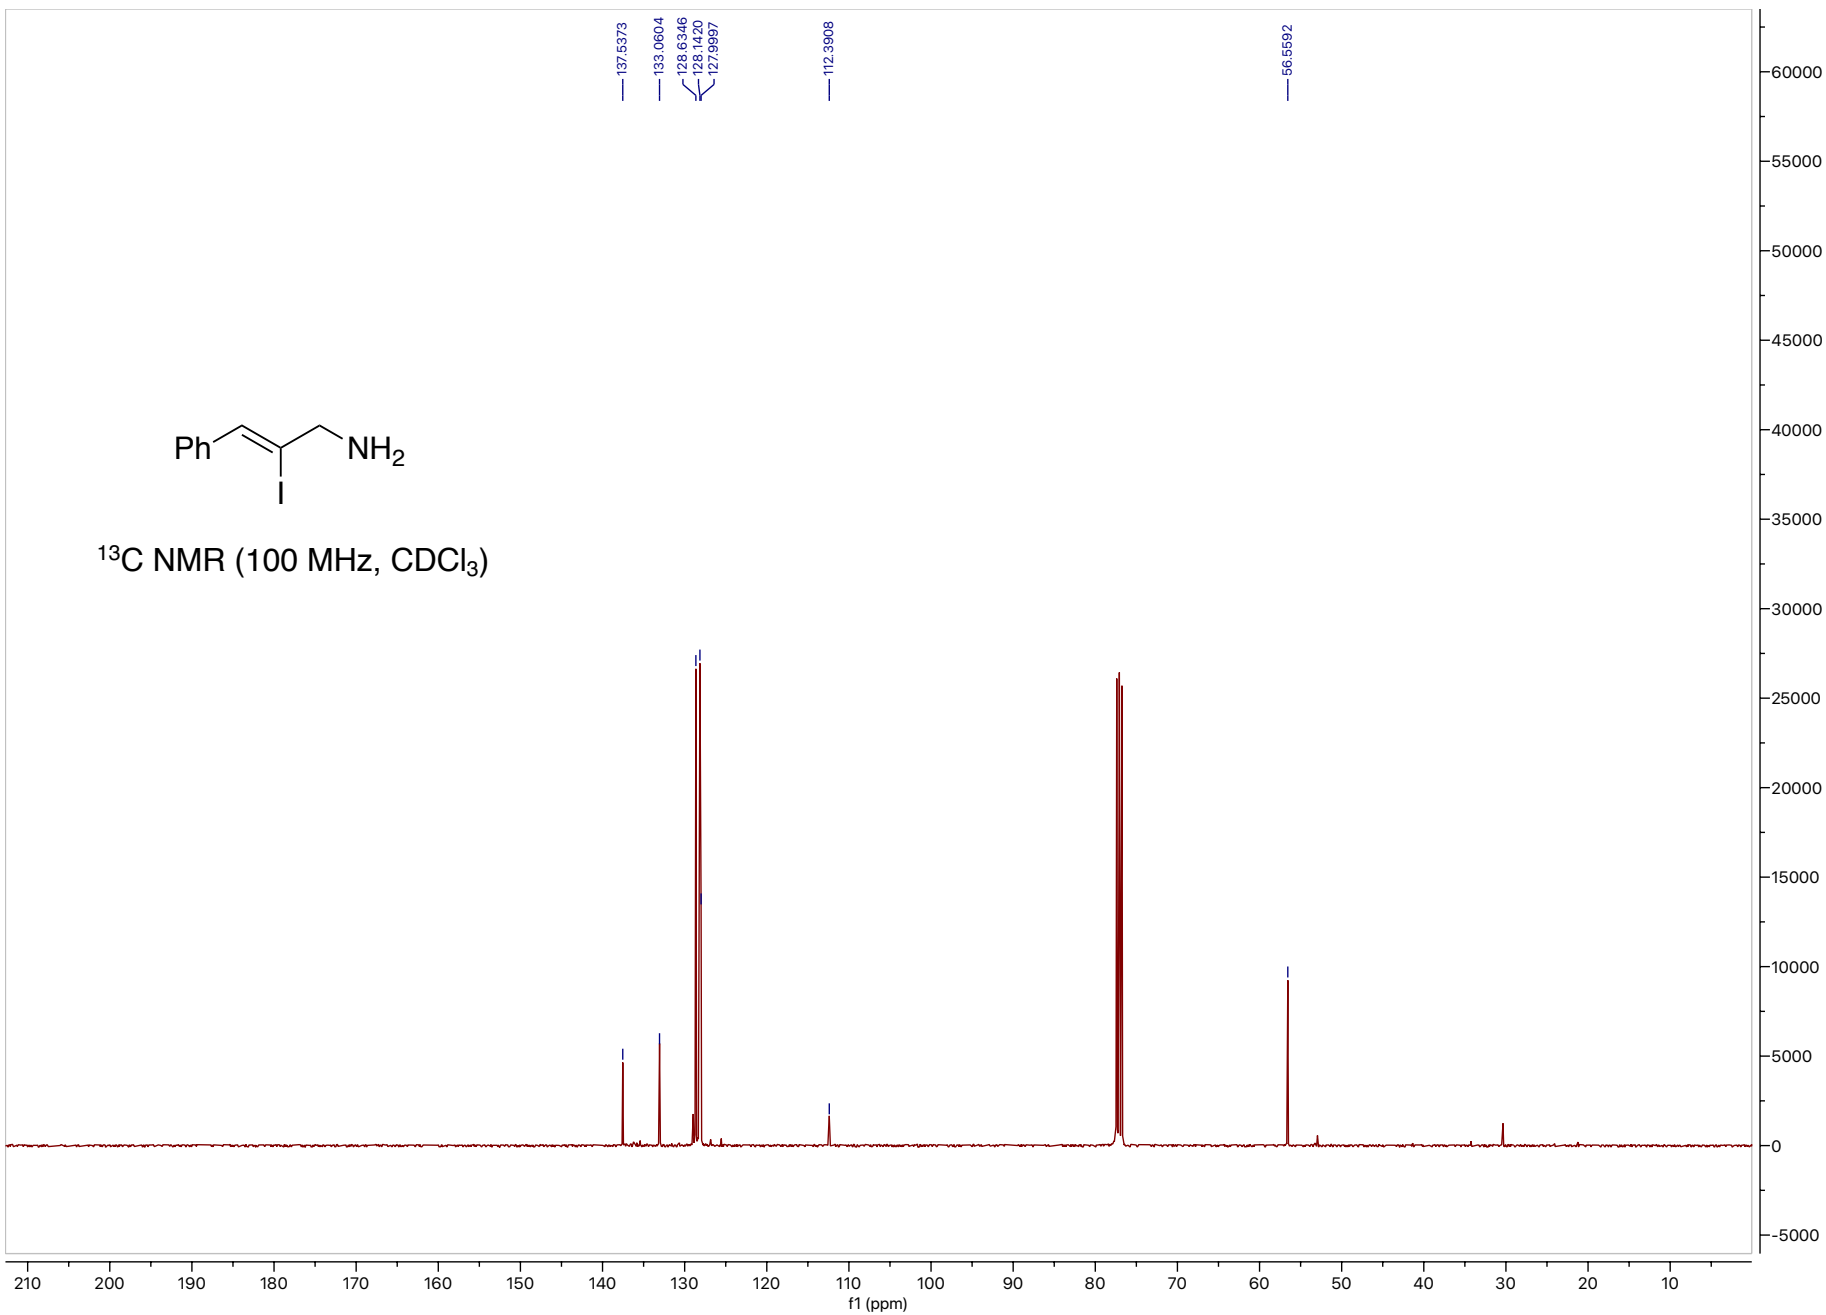

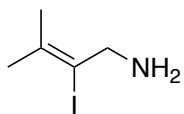

$^1\text{H}$  NMR (400 MHz,  $\text{CDCl}_3$ )

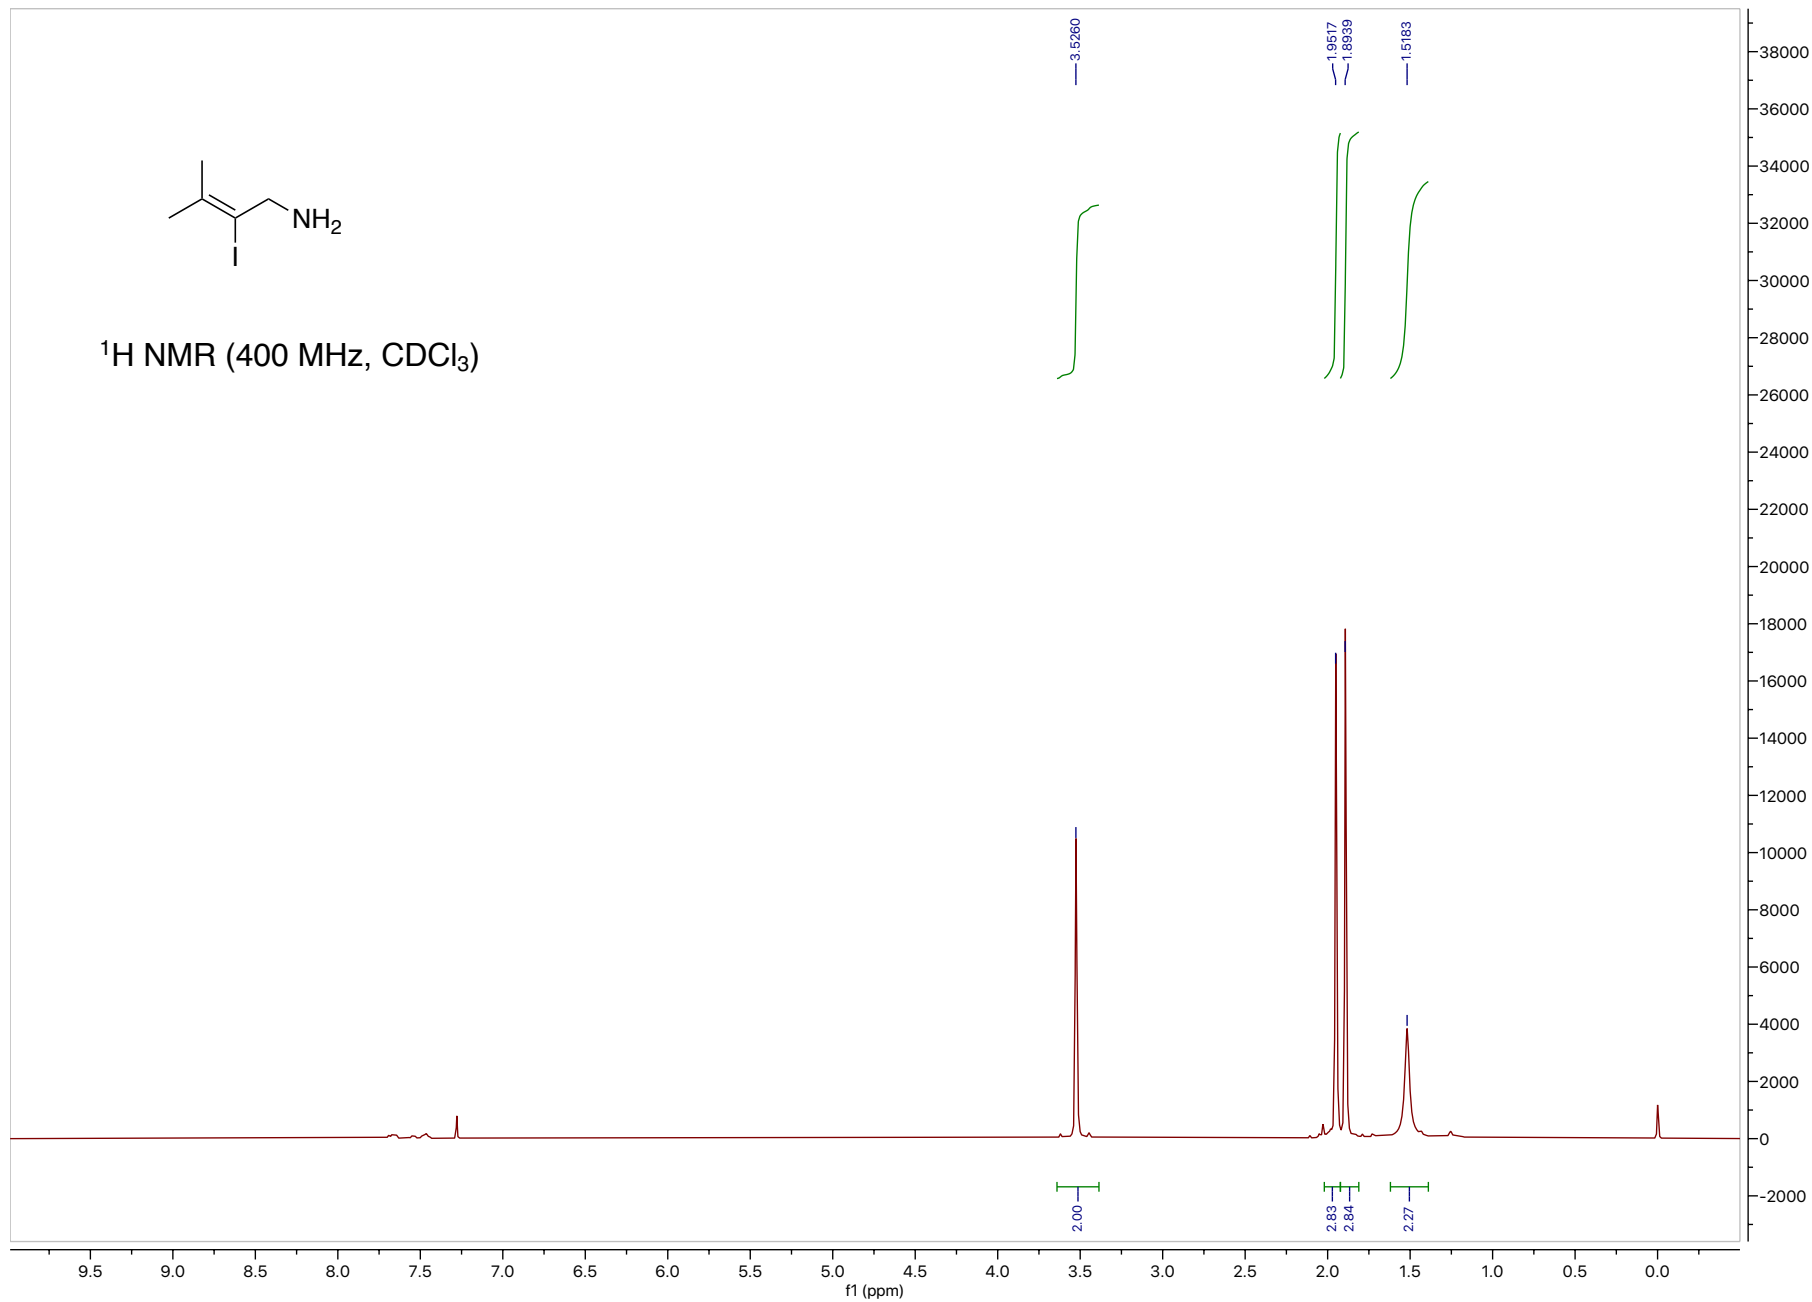

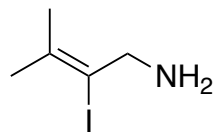

$^{13}\text{C}$  NMR (100 MHz,  $\text{CDCl}_3$ )

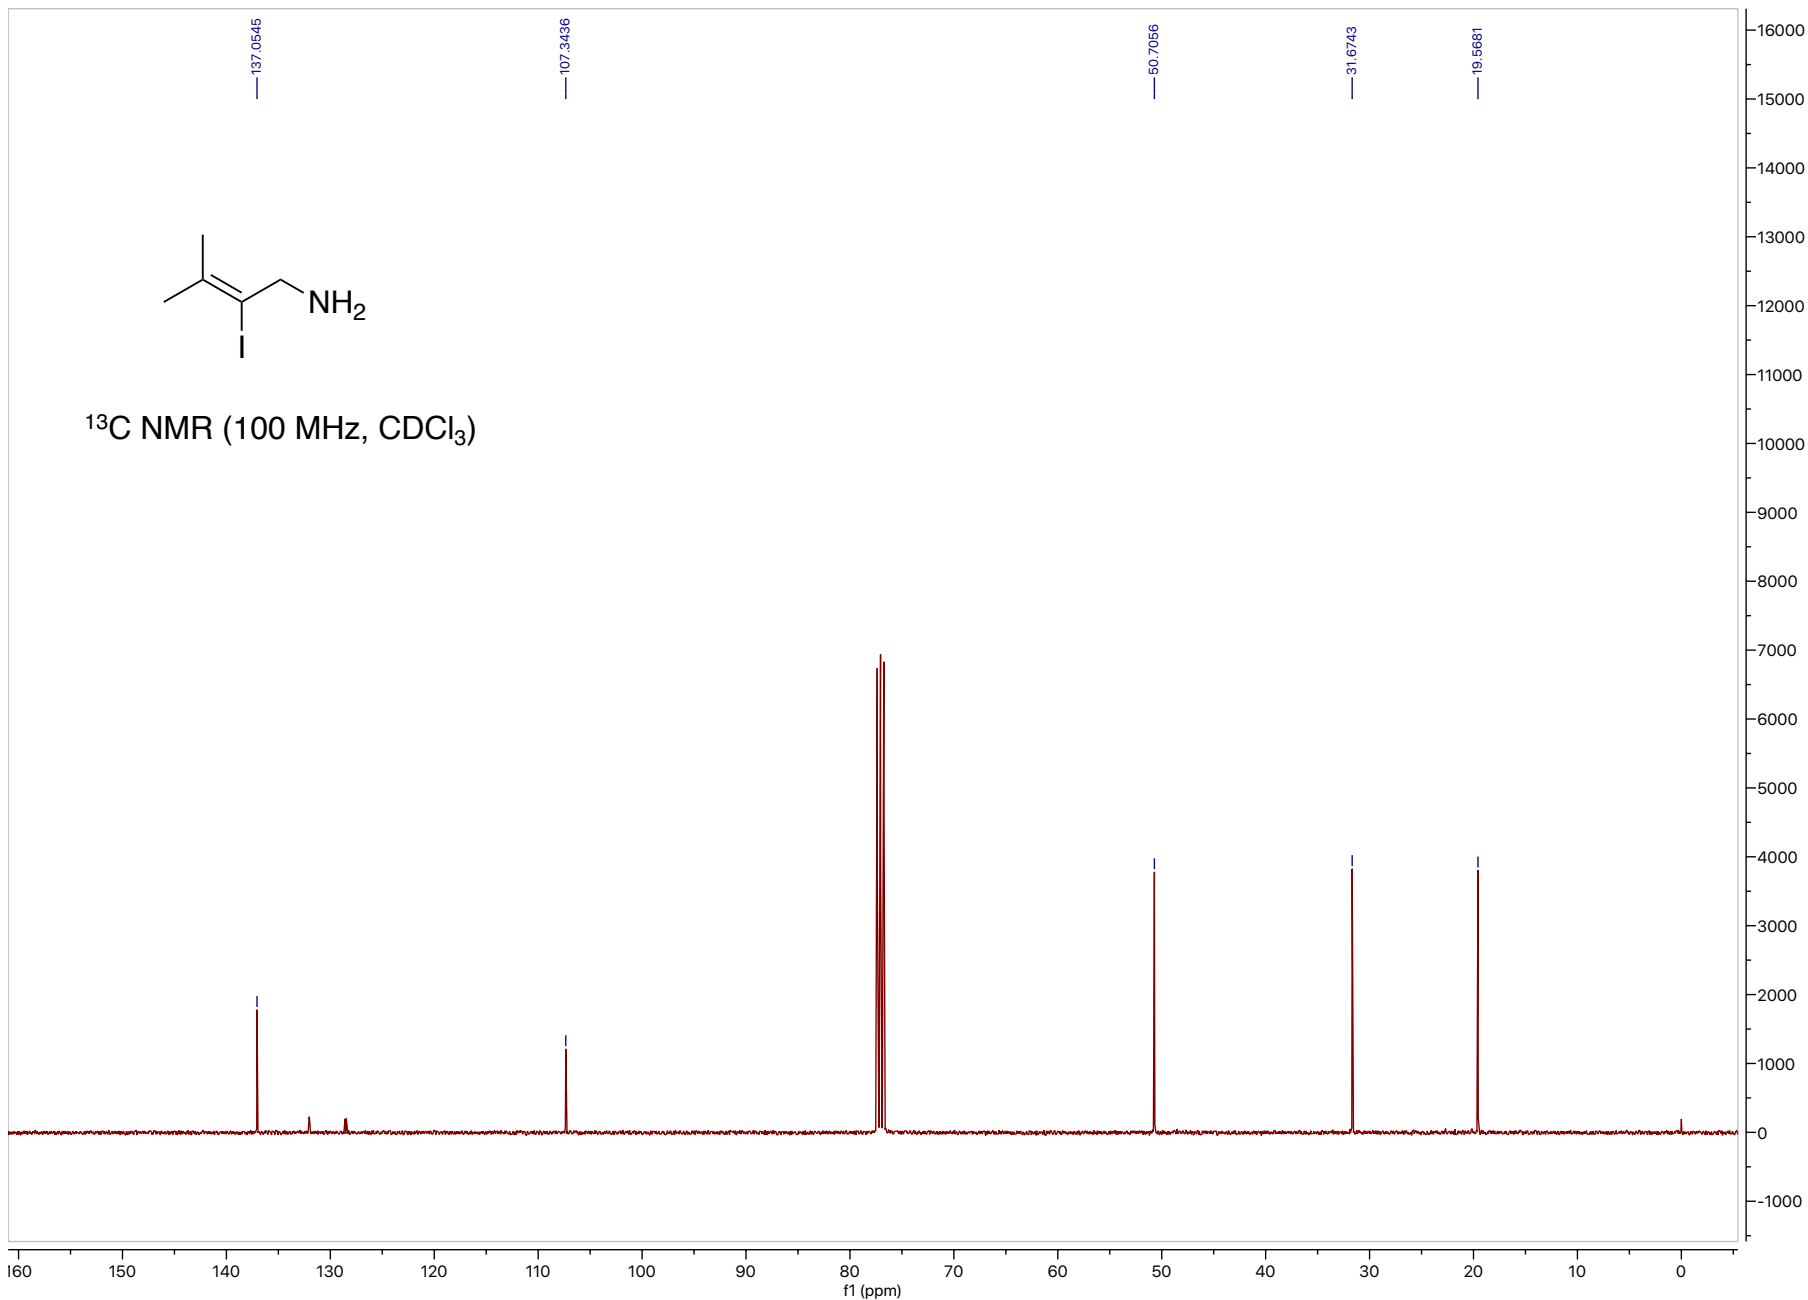

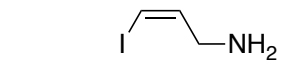

$^1\text{H}$  NMR (400 MHz,  $\text{CDCl}_3$ )

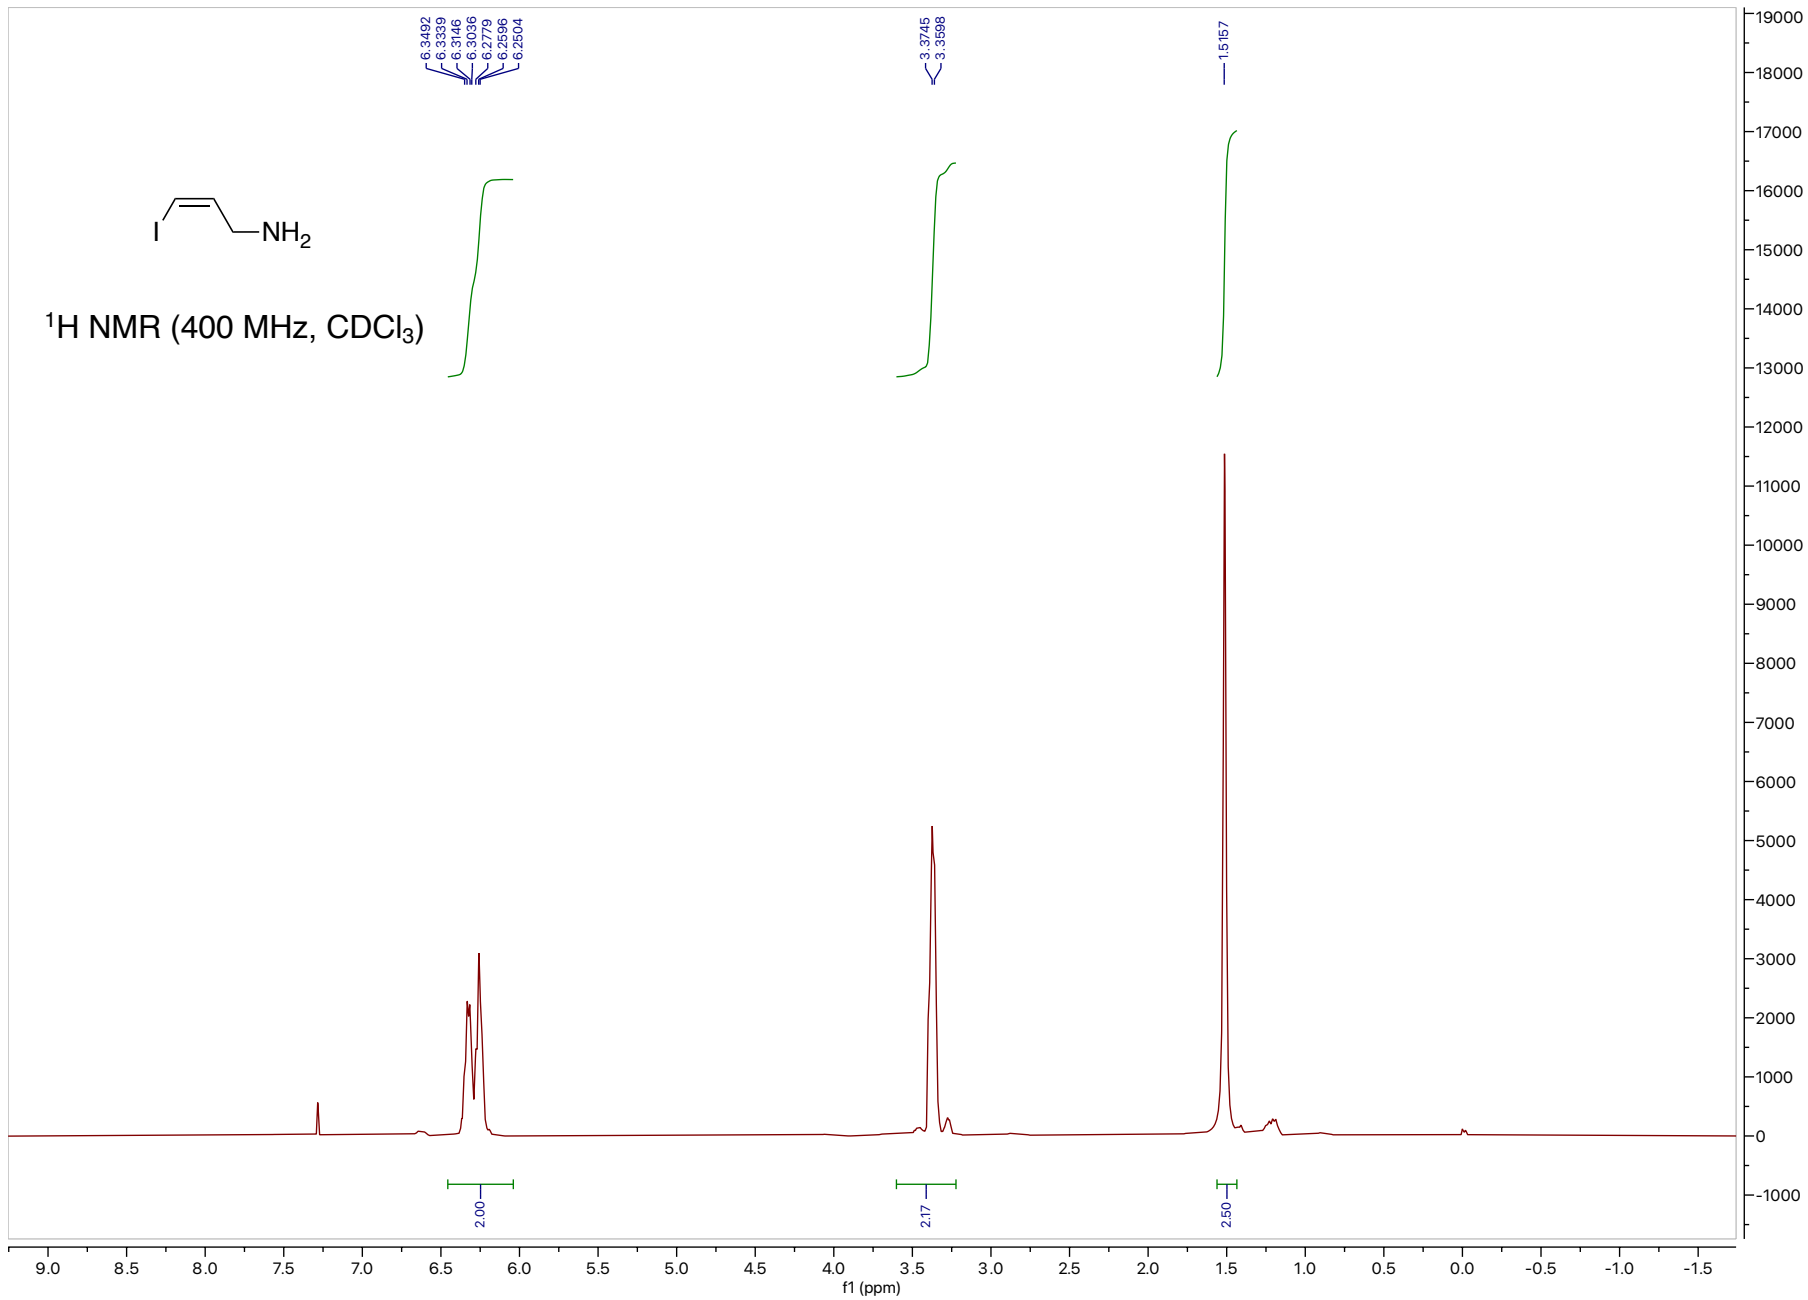

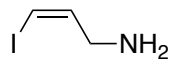

$^{13}\text{C}$  NMR (100 MHz,  $\text{CDCl}_3$ )

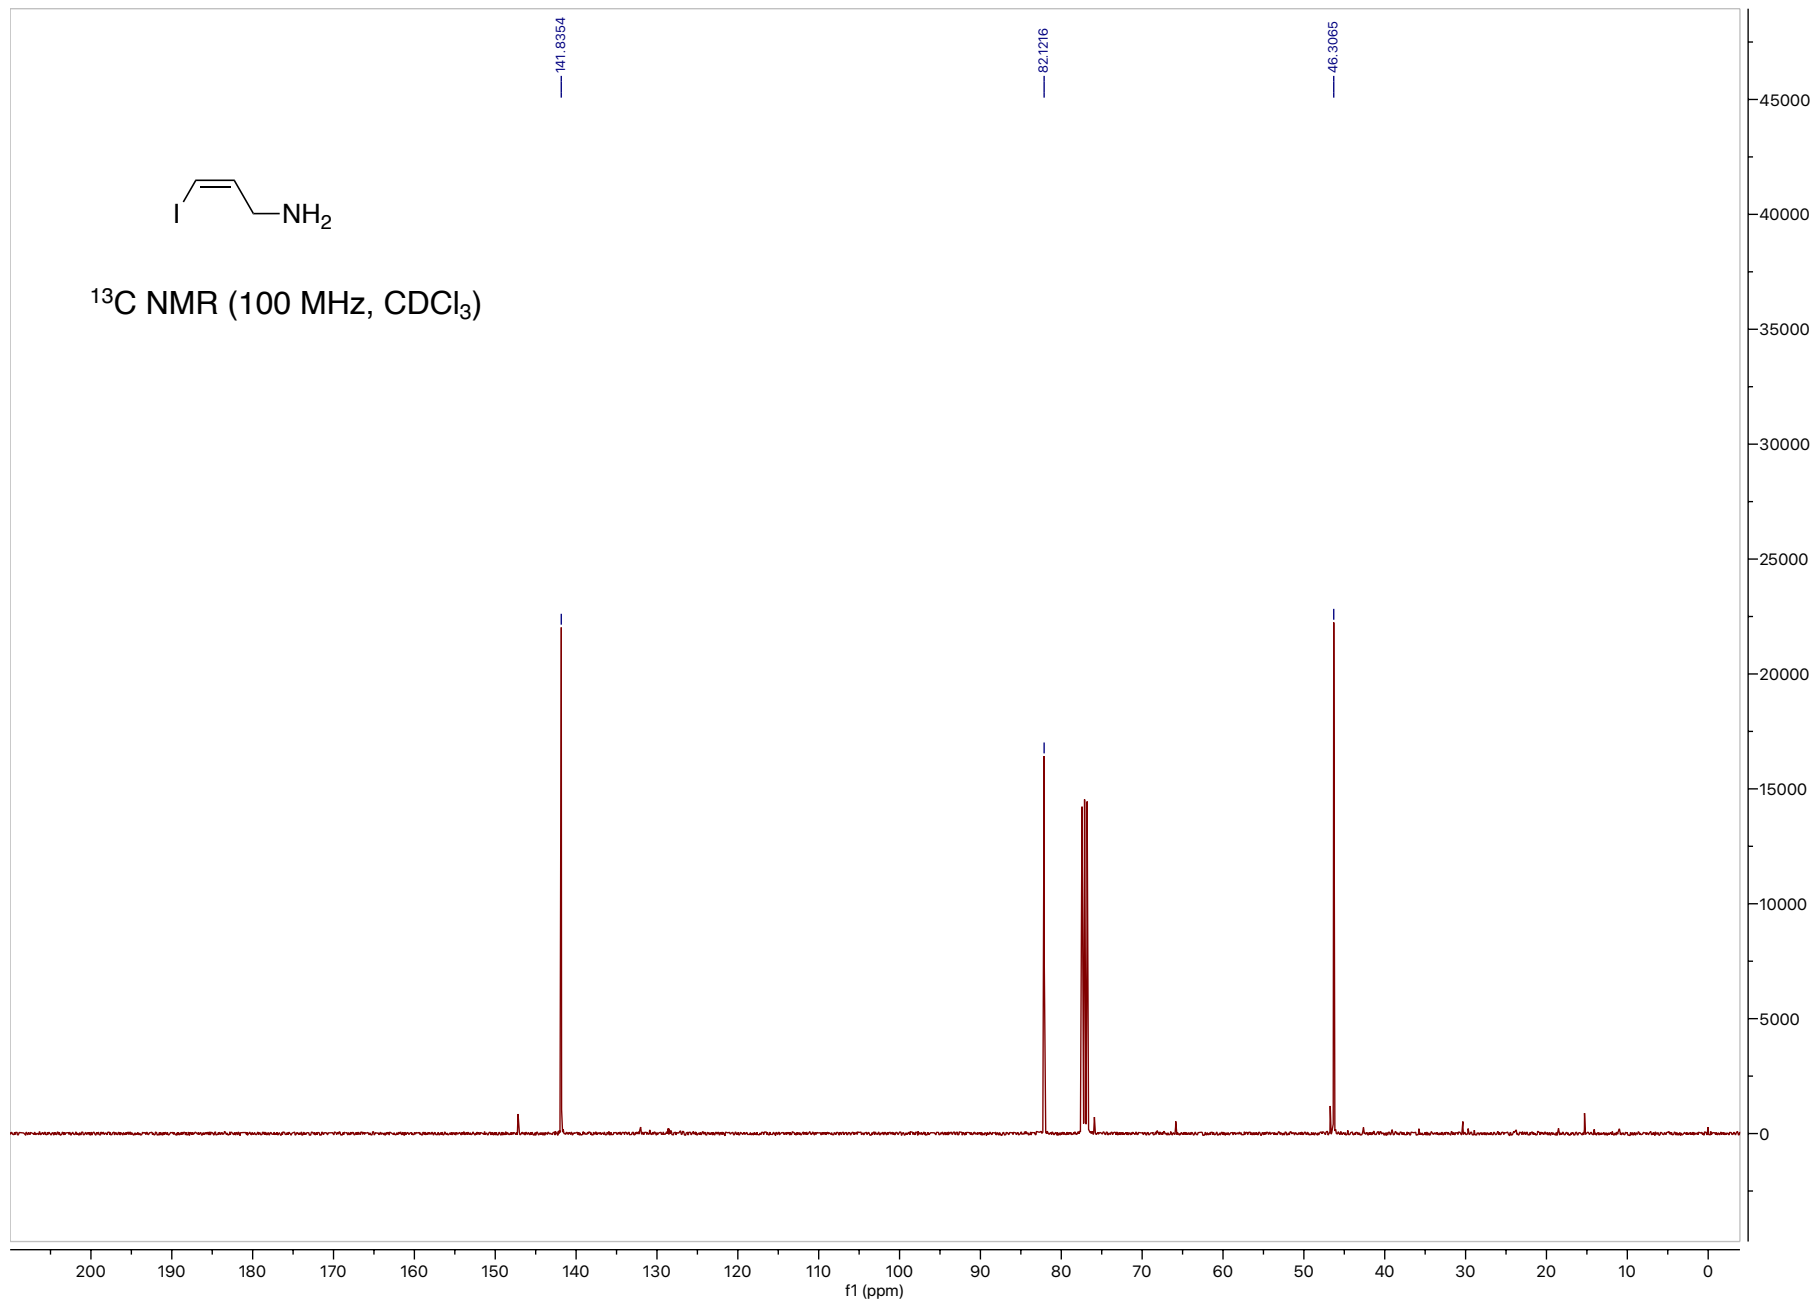

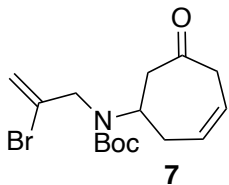

$^1\text{H NMR}$  (400 MHz,  $\text{CDCl}_3$ )

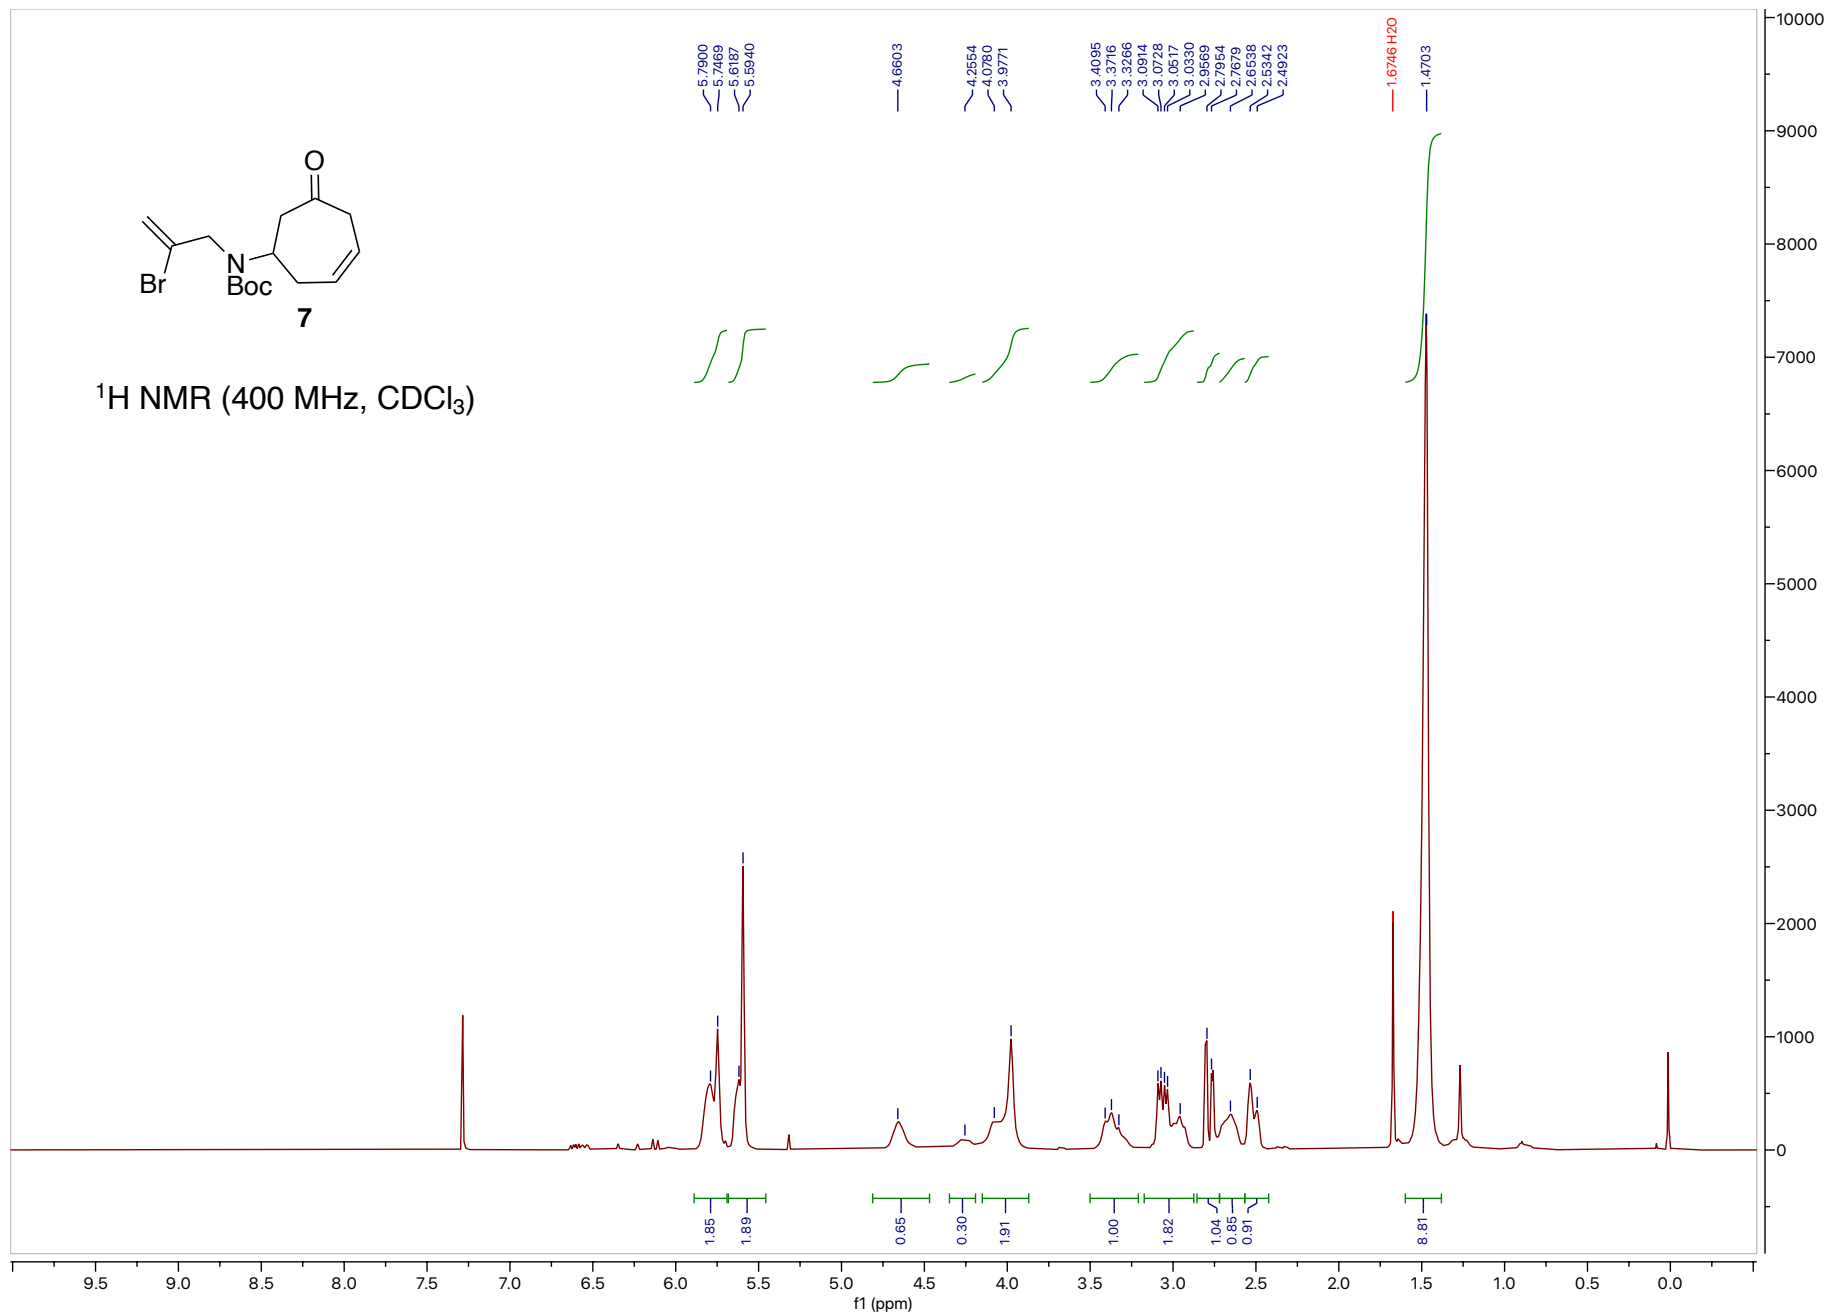

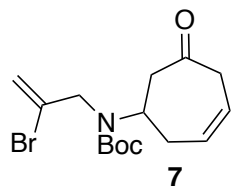

$^{13}\text{C}$  NMR (100 MHz,  $\text{CDCl}_3$ )

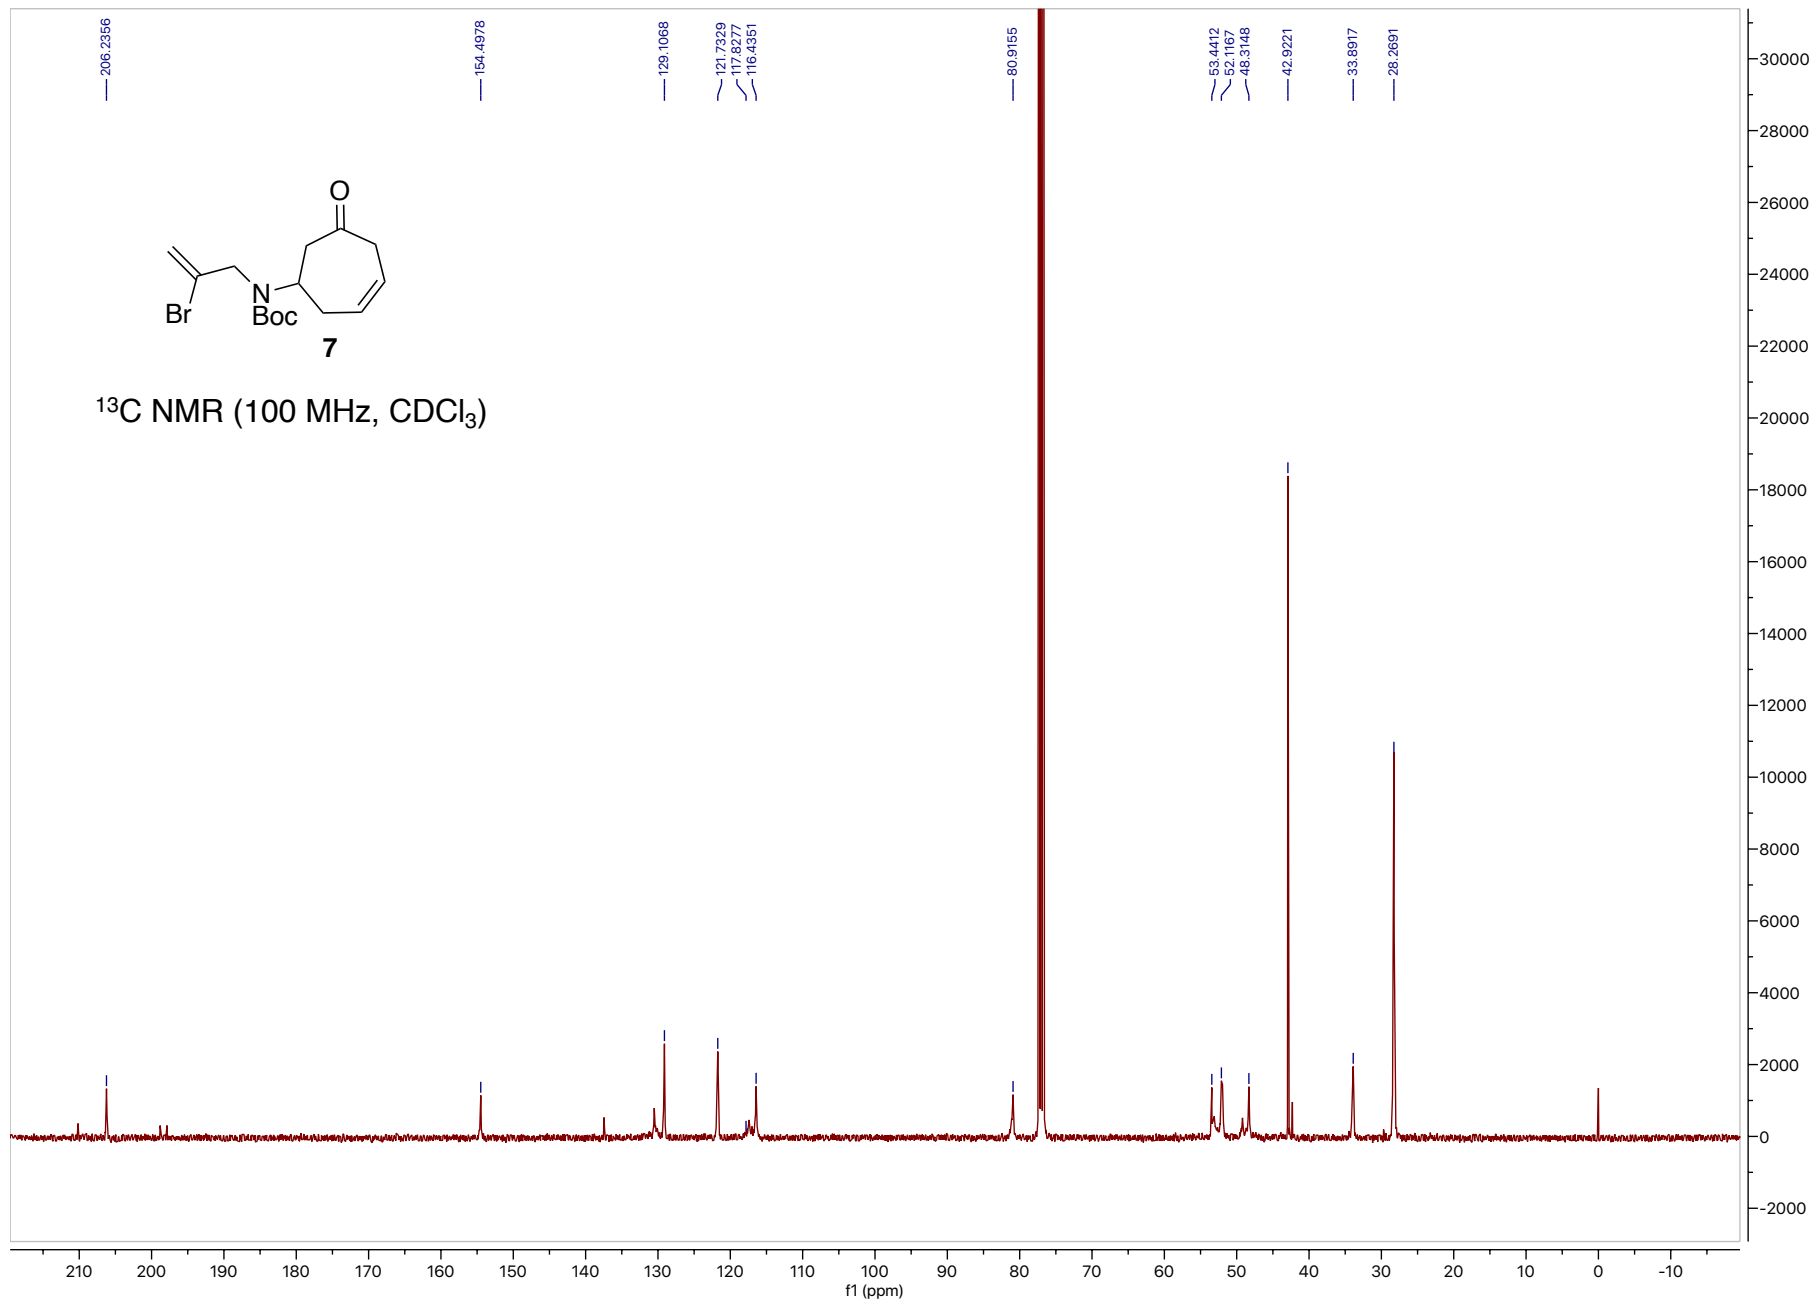

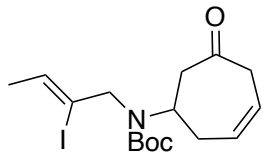

**9**

$^1\text{H}$  NMR (400 MHz,  $\text{CDCl}_3$ )

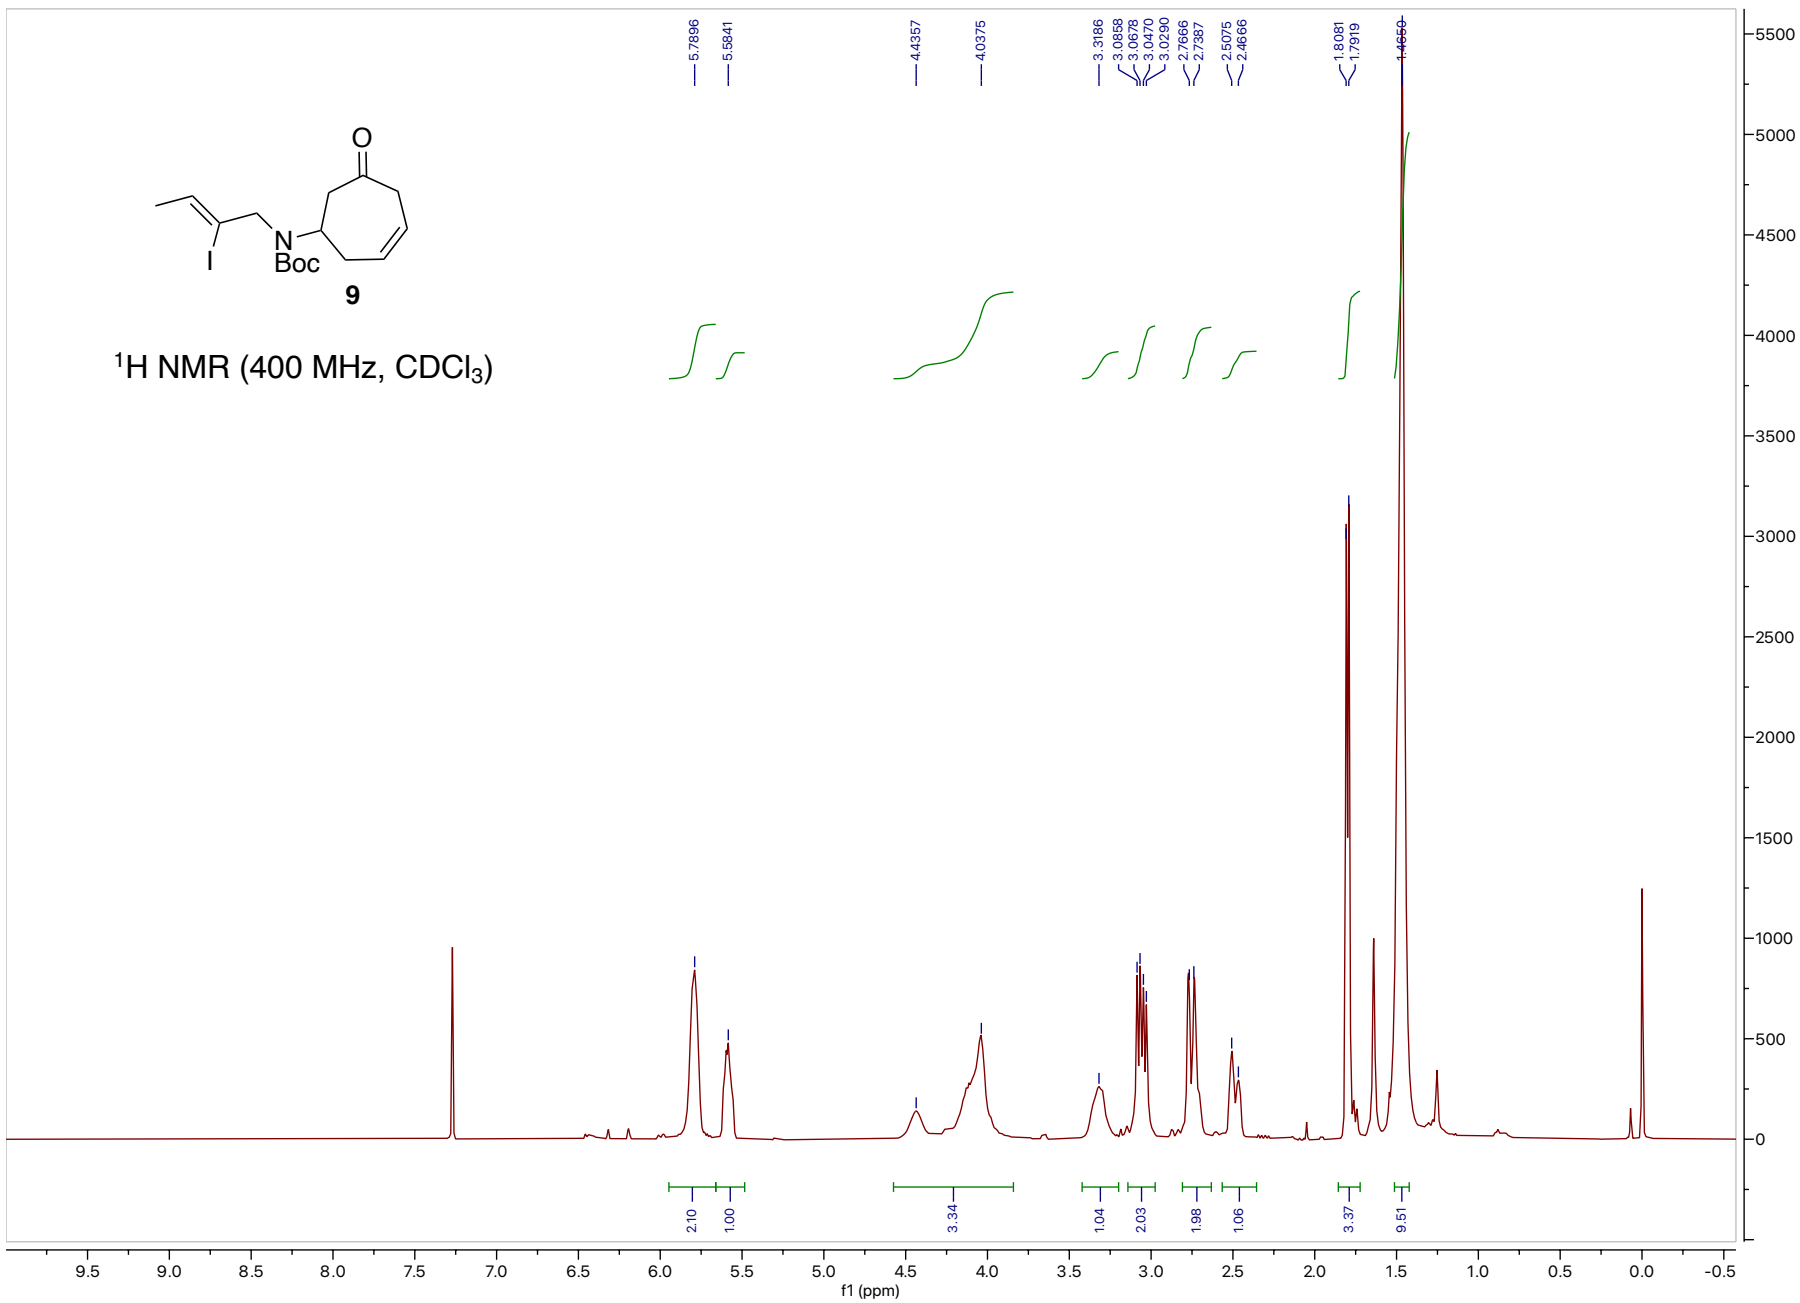



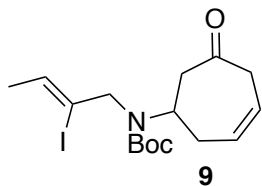

$^{13}\text{C}$  NMR (100 MHz,  $\text{CDCl}_3$ )

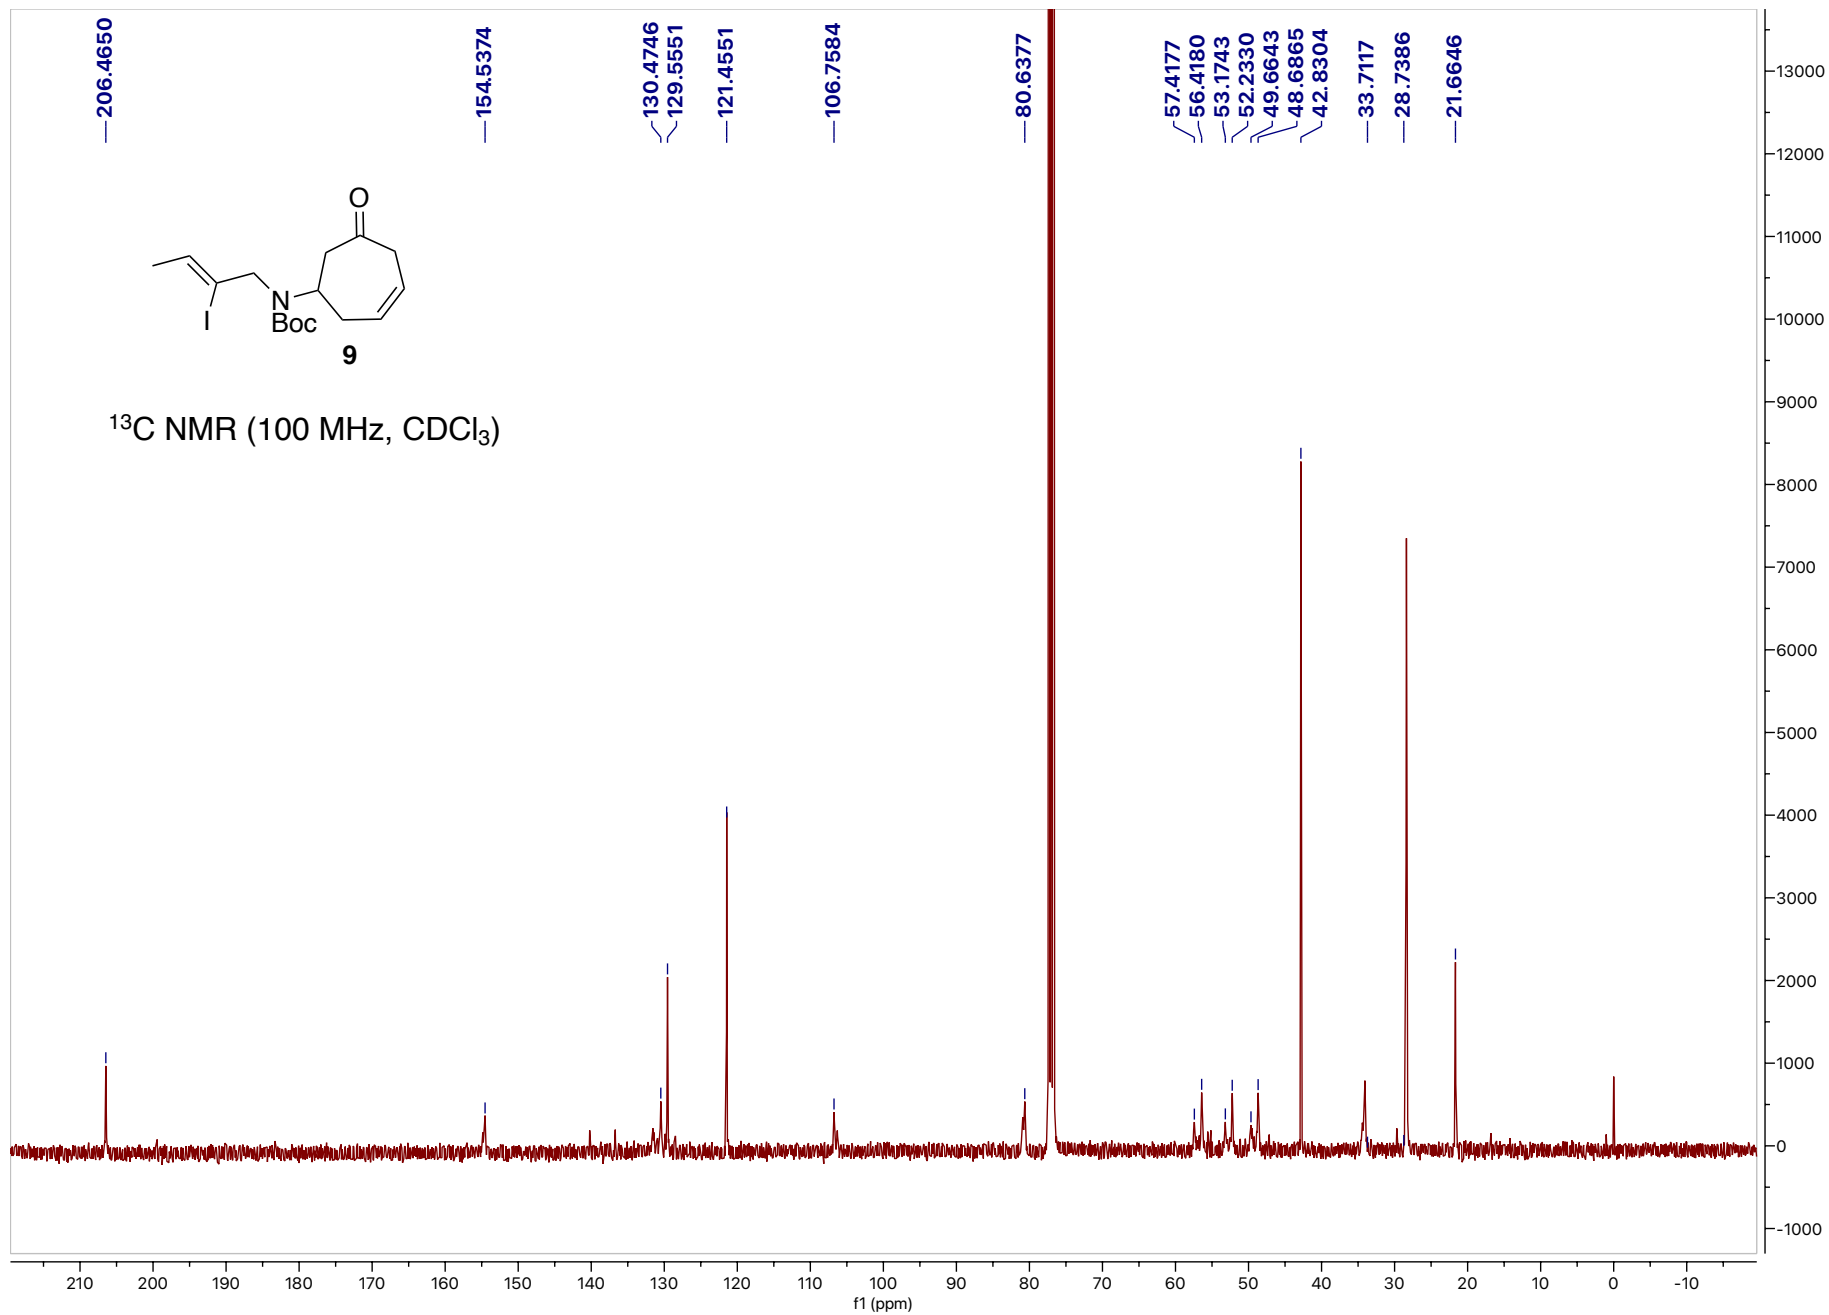

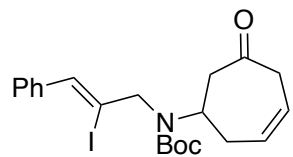

**13**

$^1\text{H}$  NMR (400 MHz,  $\text{CDCl}_3$ )

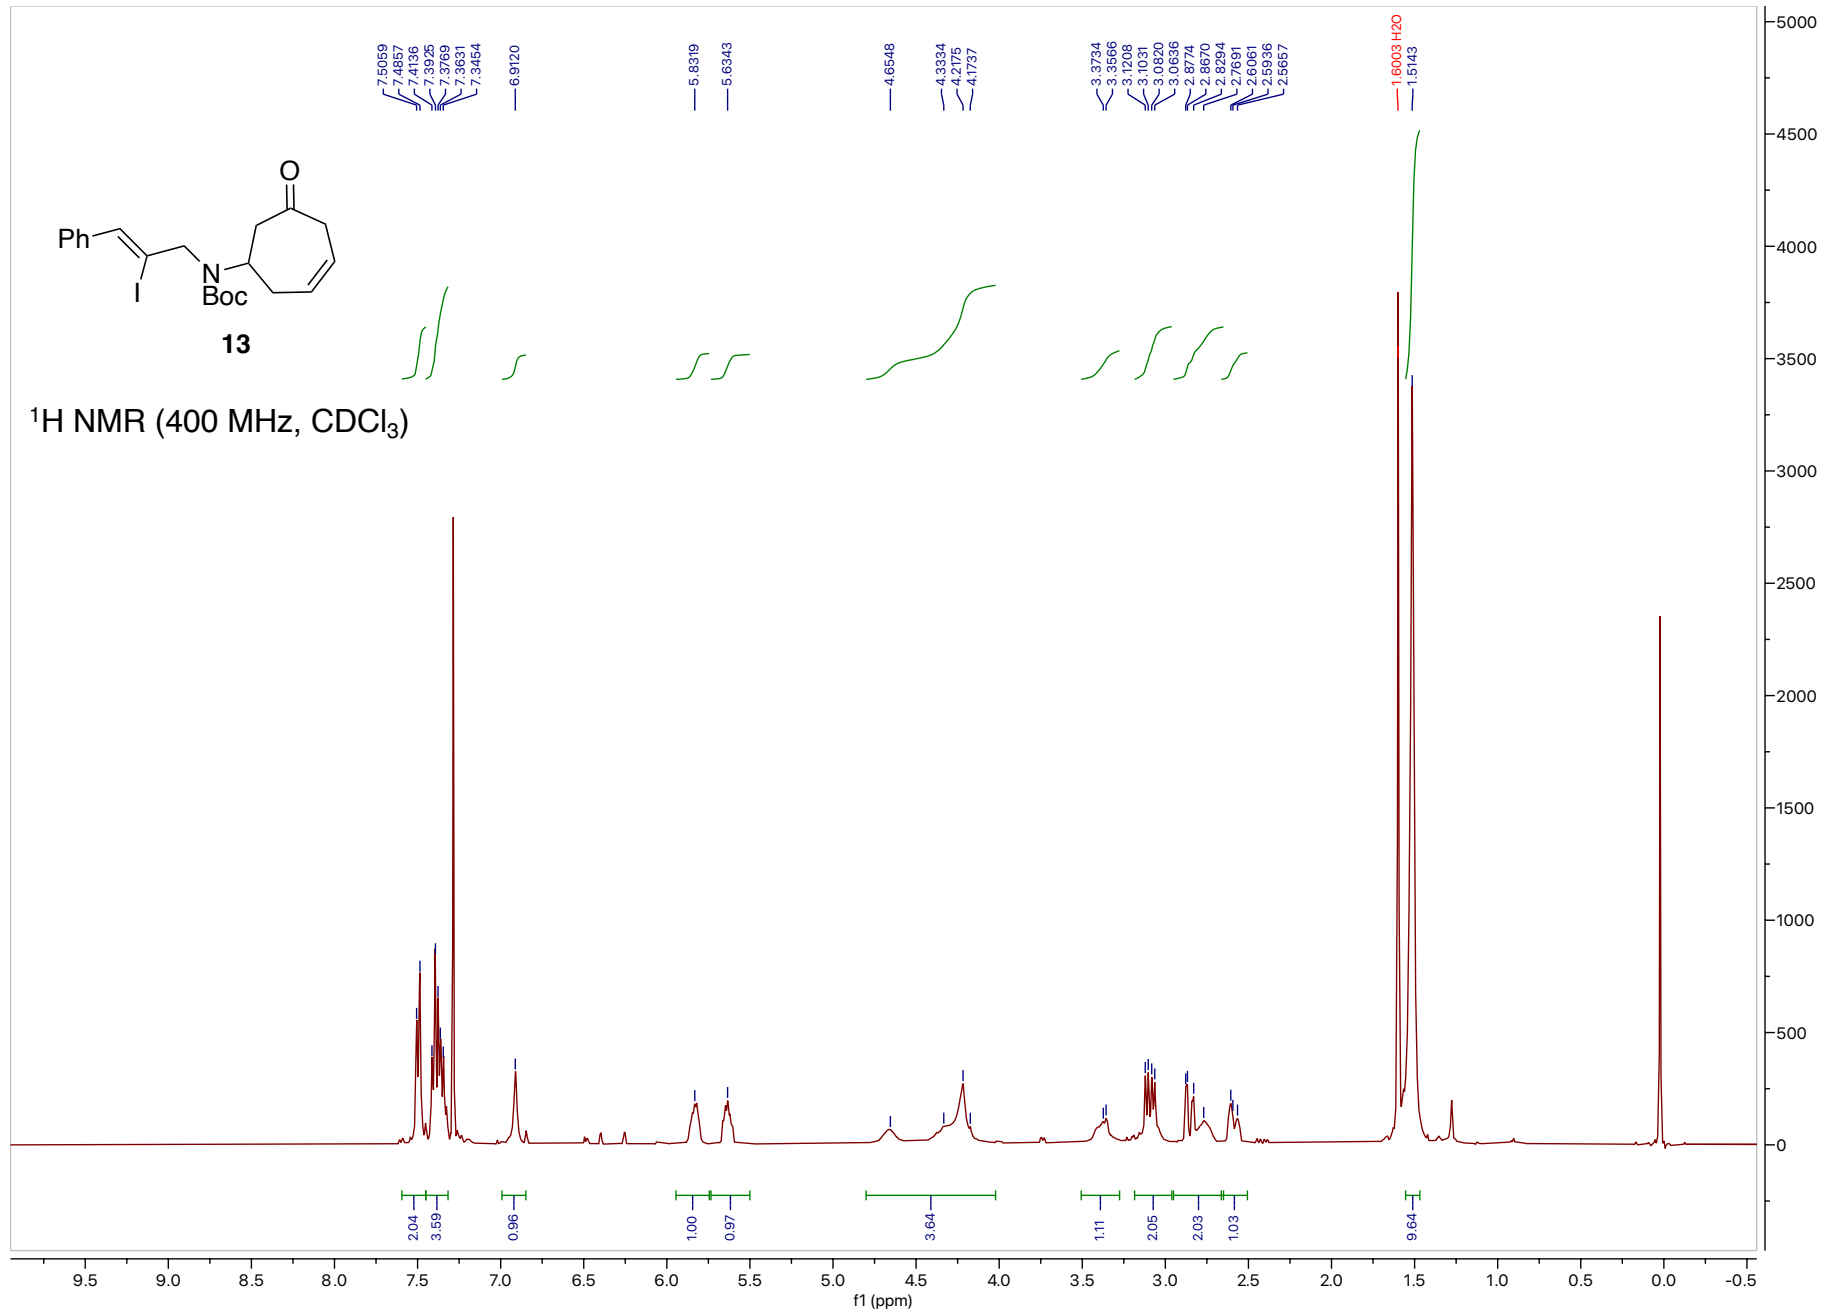

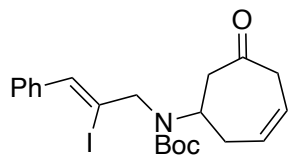

**13**

$^{13}\text{C}$  NMR (100 MHz,  $\text{CDCl}_3$ )

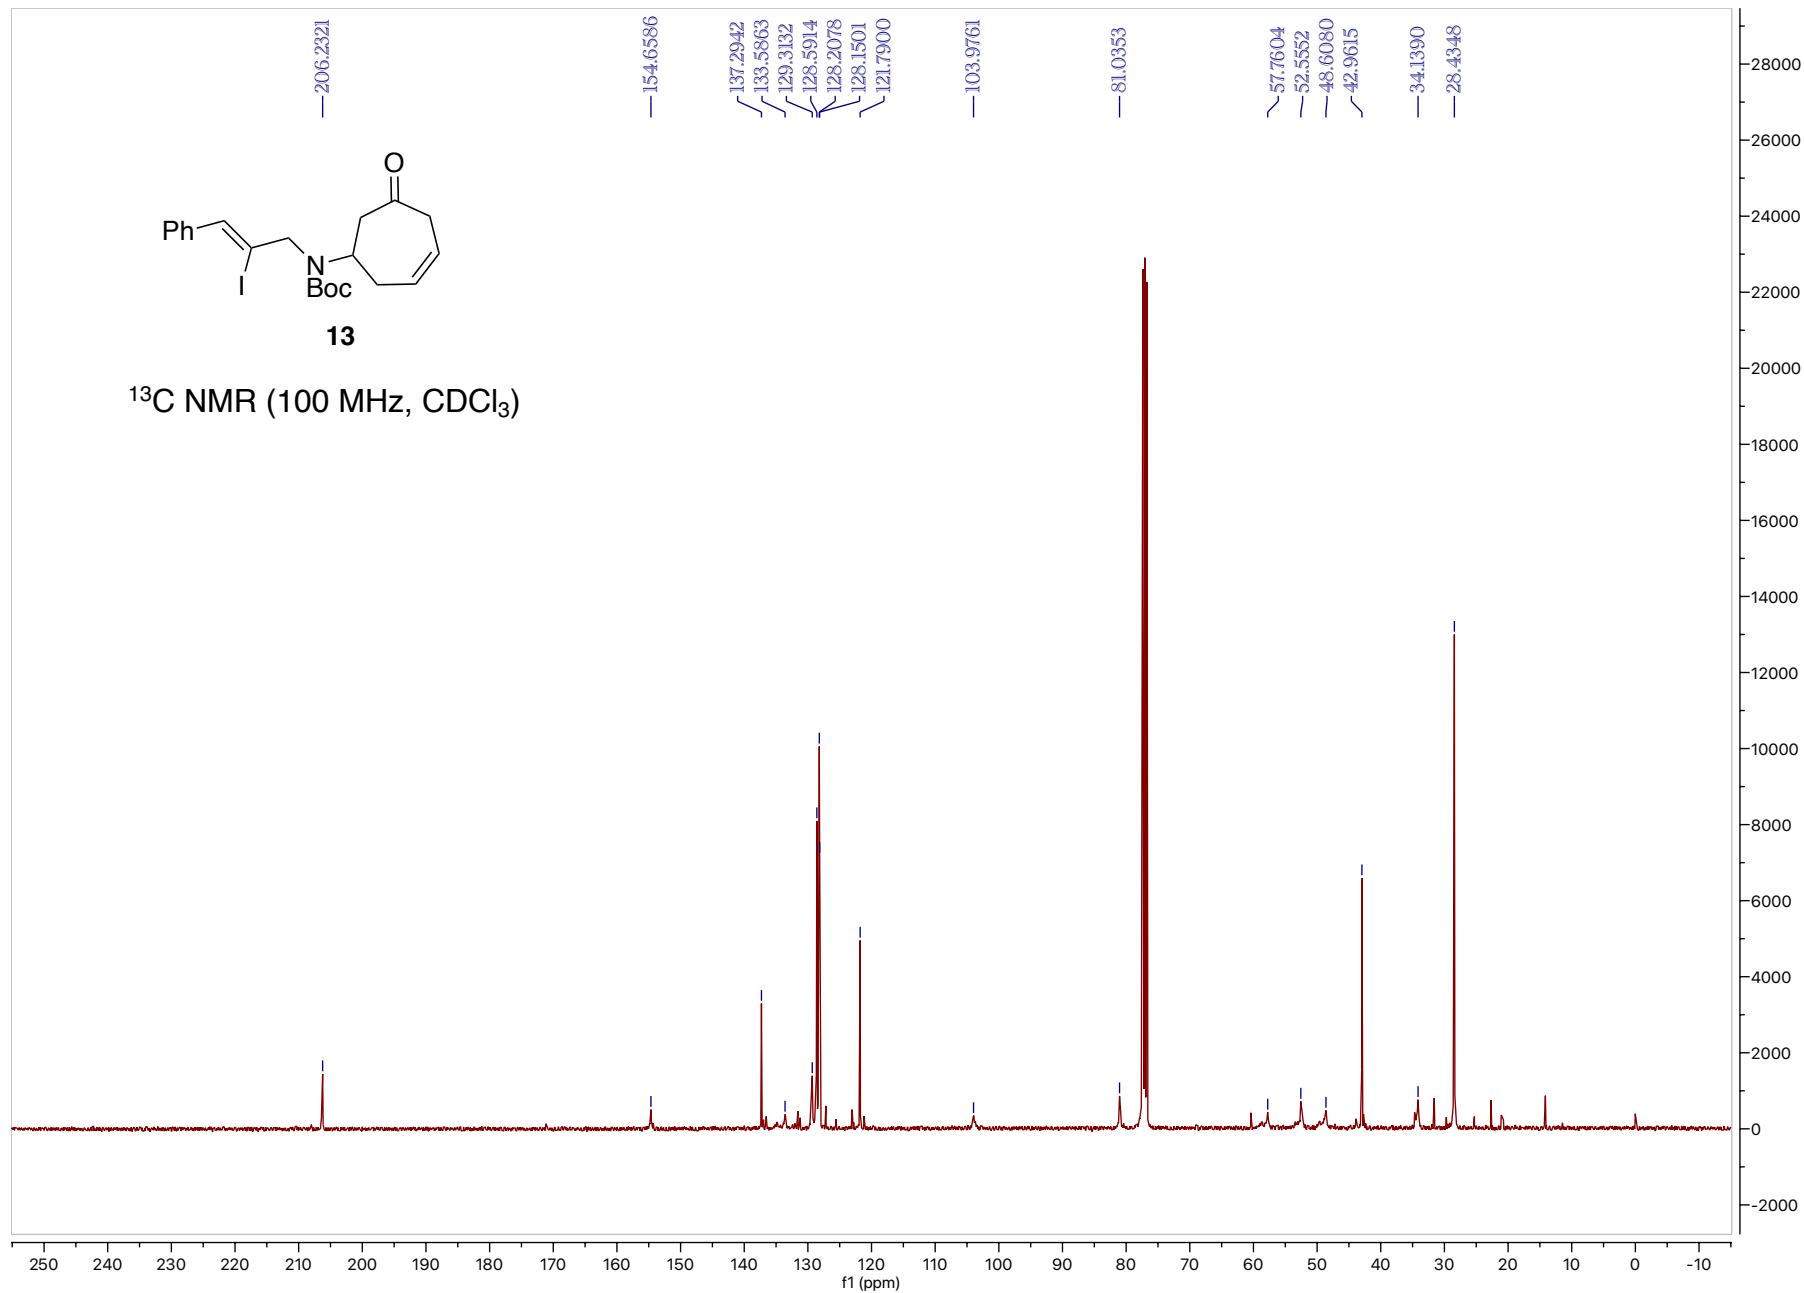

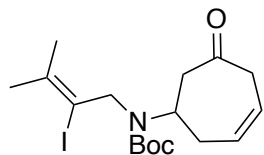

15

$^1\text{H}$  NMR (400 MHz,  $\text{CDCl}_3$ )

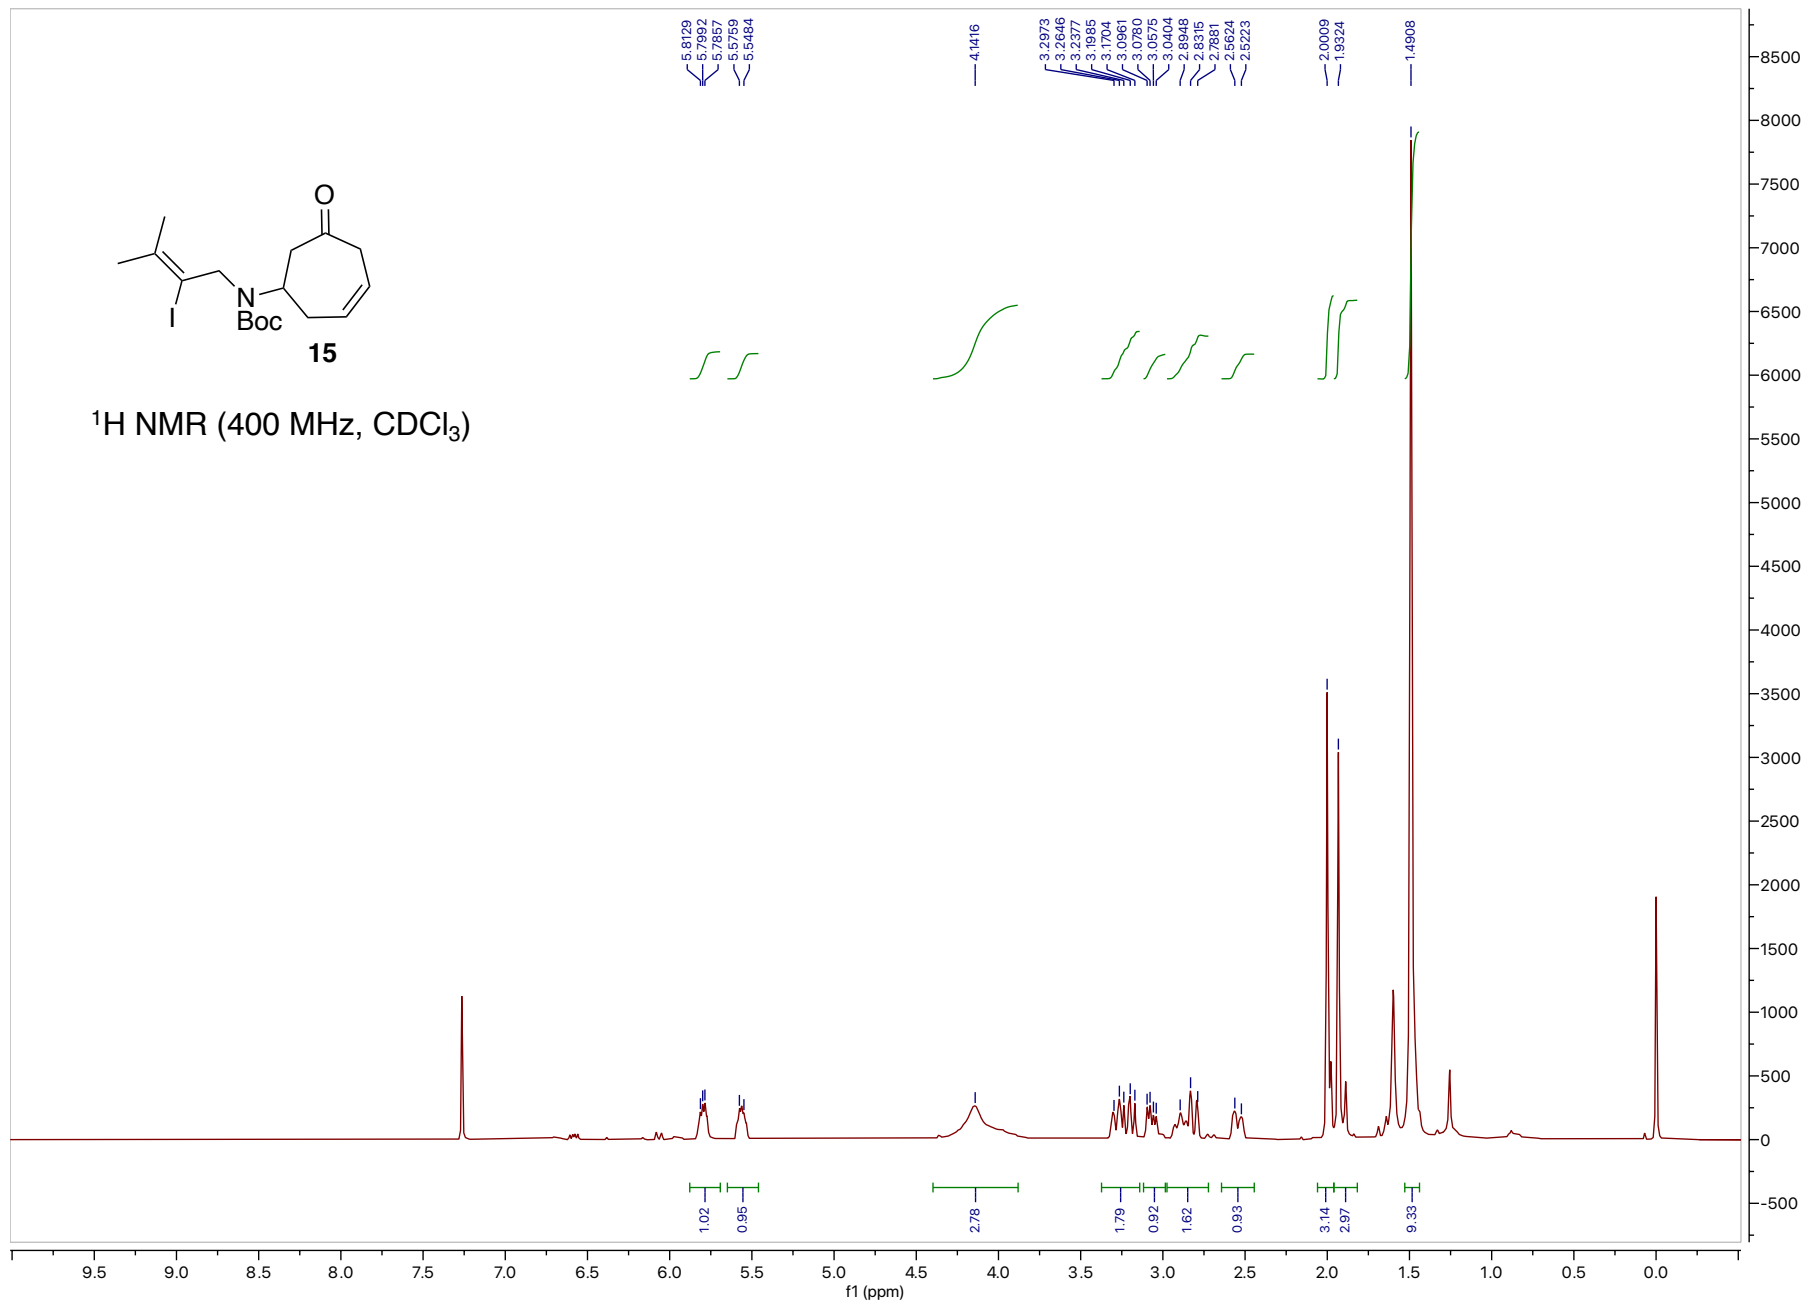

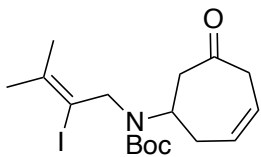

15

$^{13}\text{C}$  NMR (100 MHz,  $\text{CDCl}_3$ )

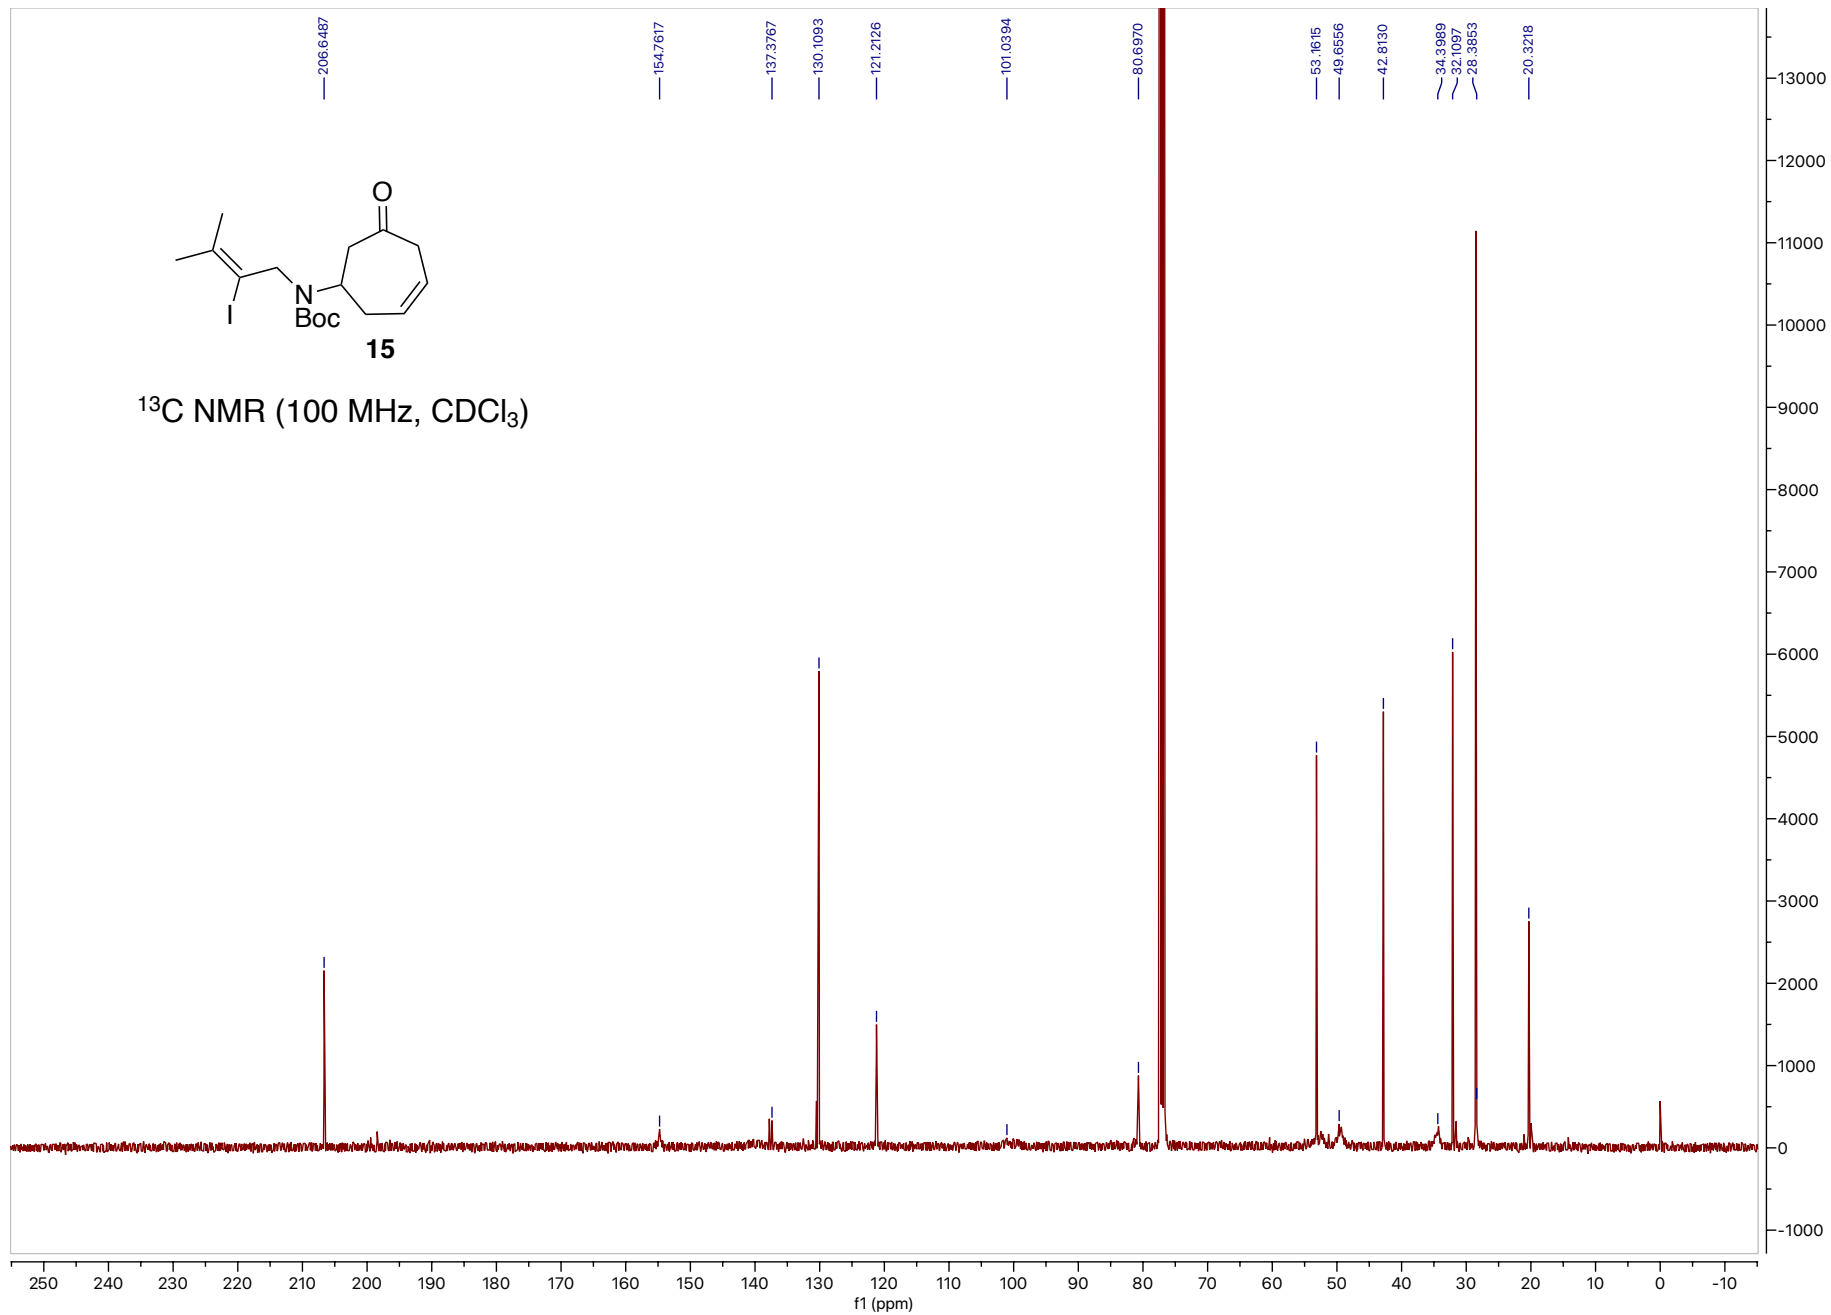

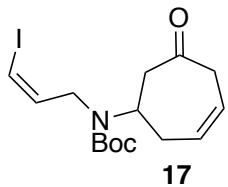

<sup>1</sup>H NMR (400 MHz, CDCl<sub>3</sub>)

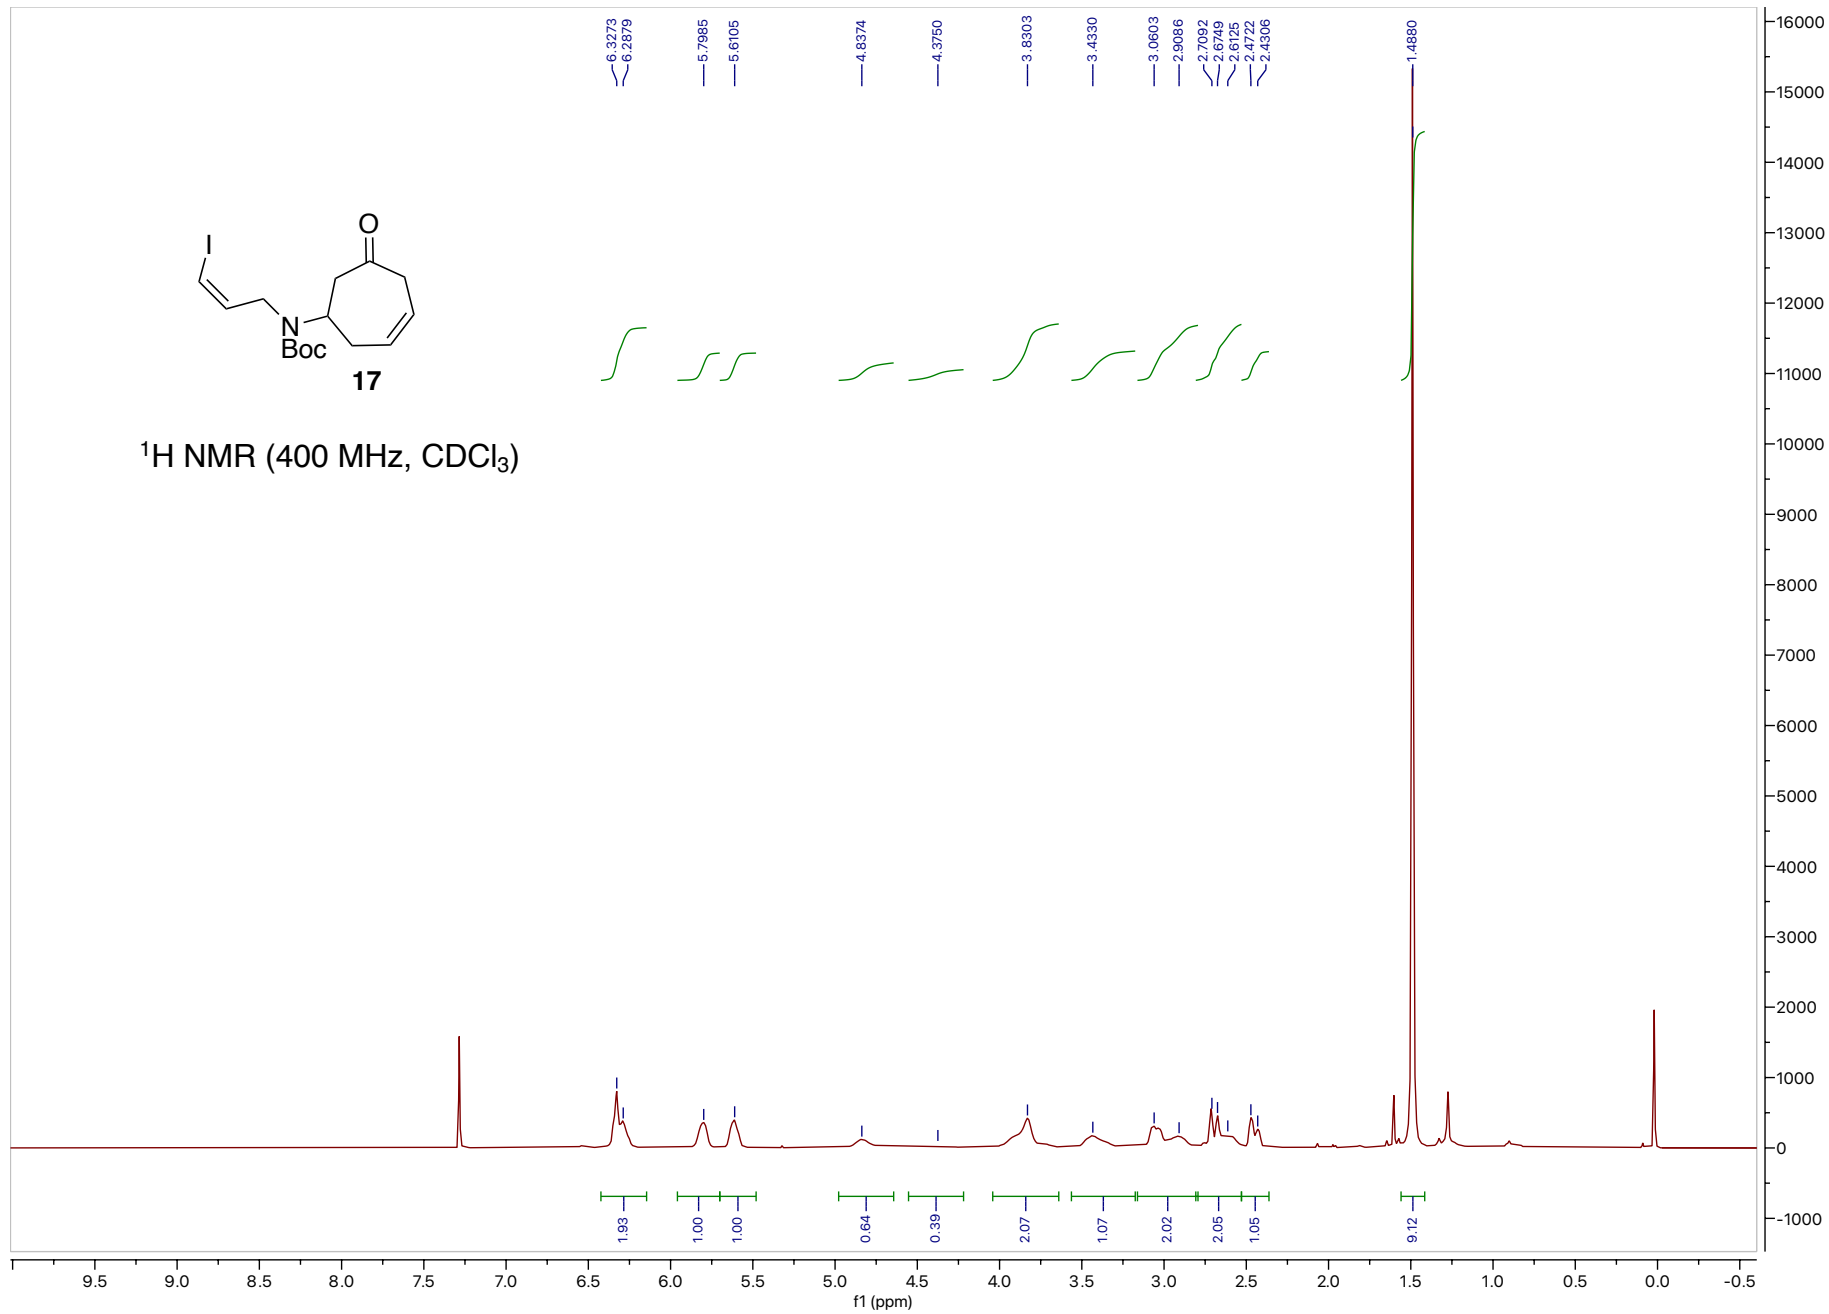

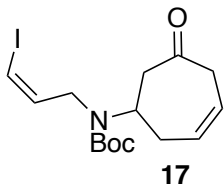

<sup>13</sup>C NMR (100 MHz, CDCl<sub>3</sub>)

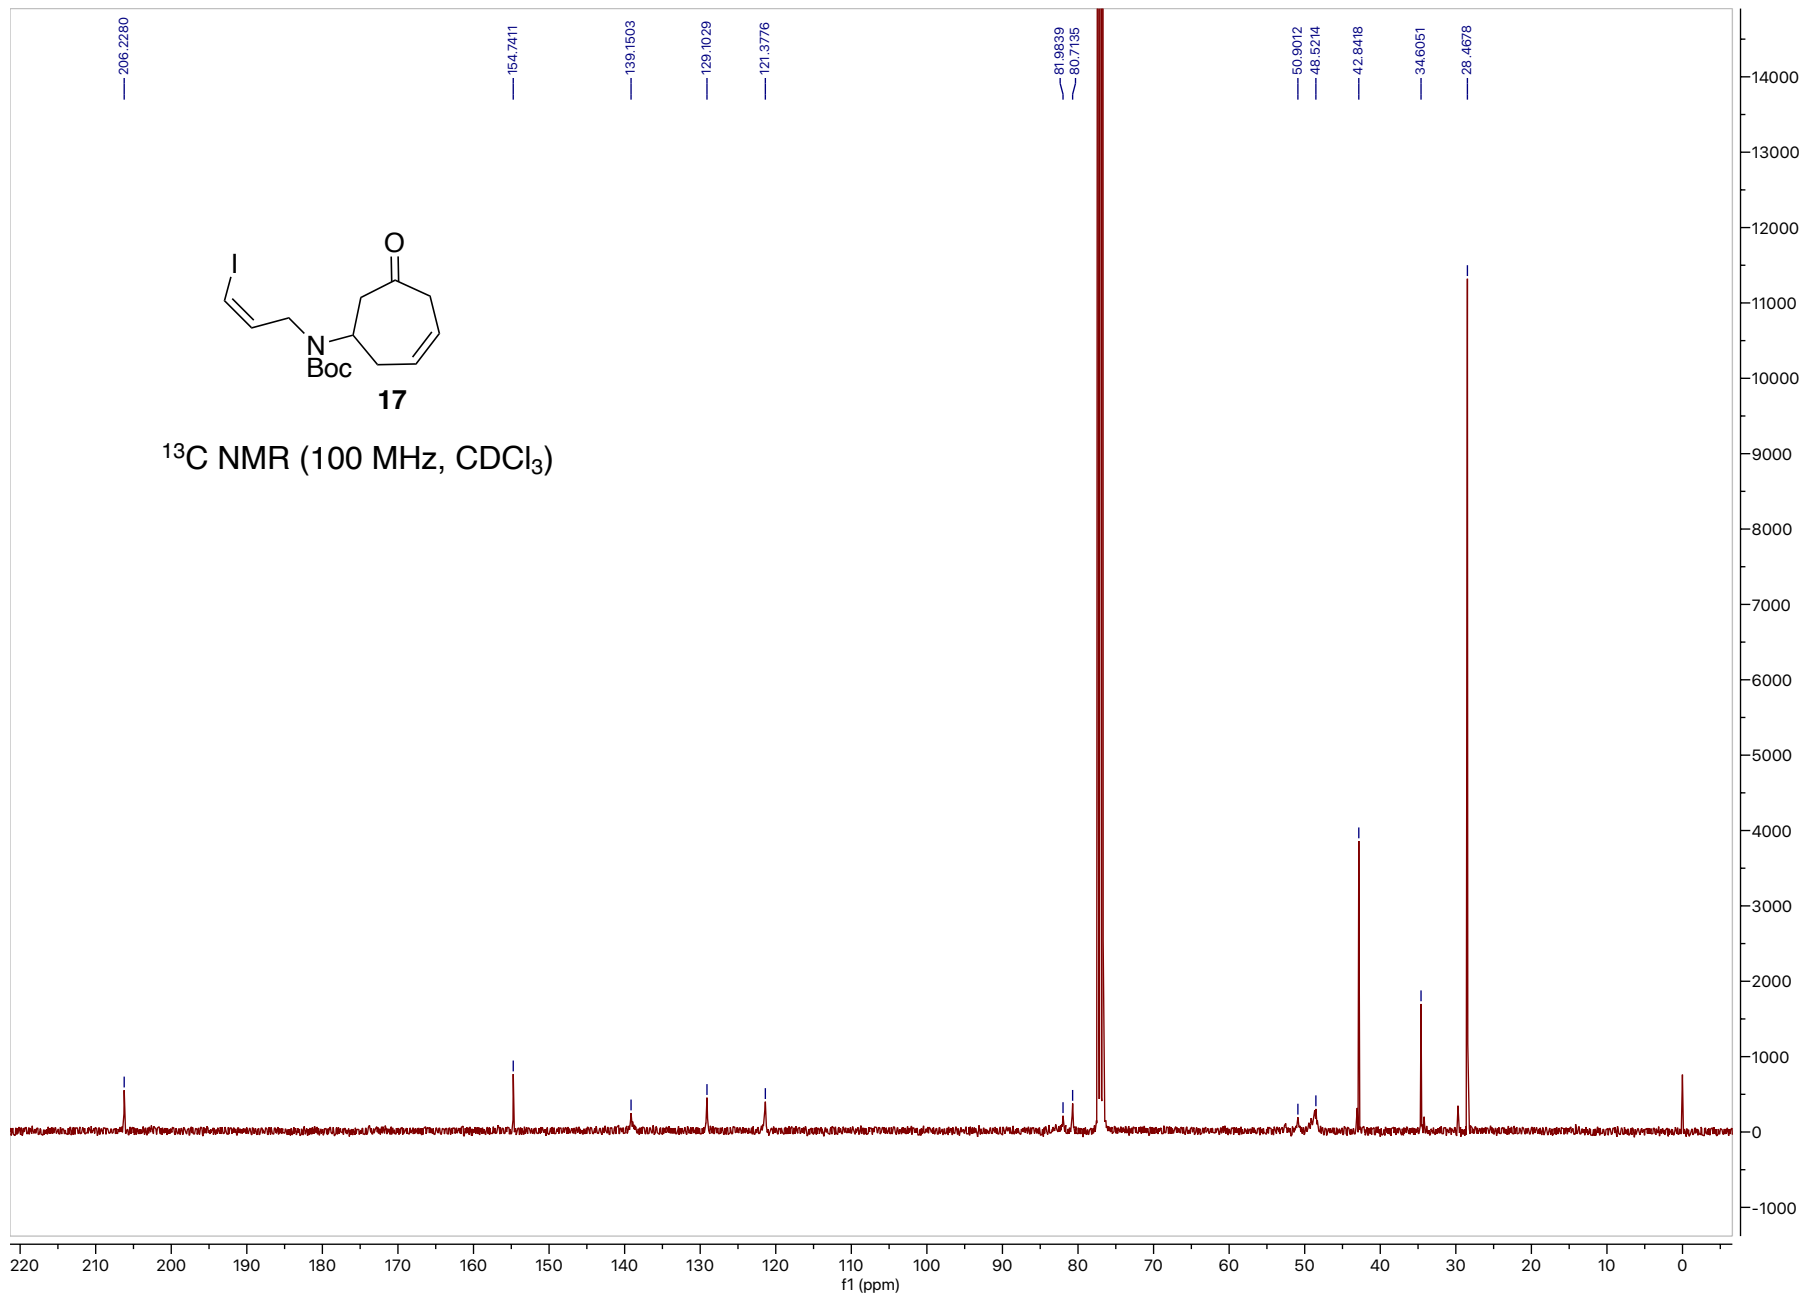

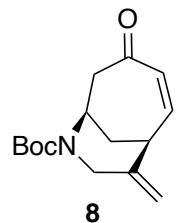

$^1\text{H}$  NMR (400 MHz,  $\text{CDCl}_3$ )

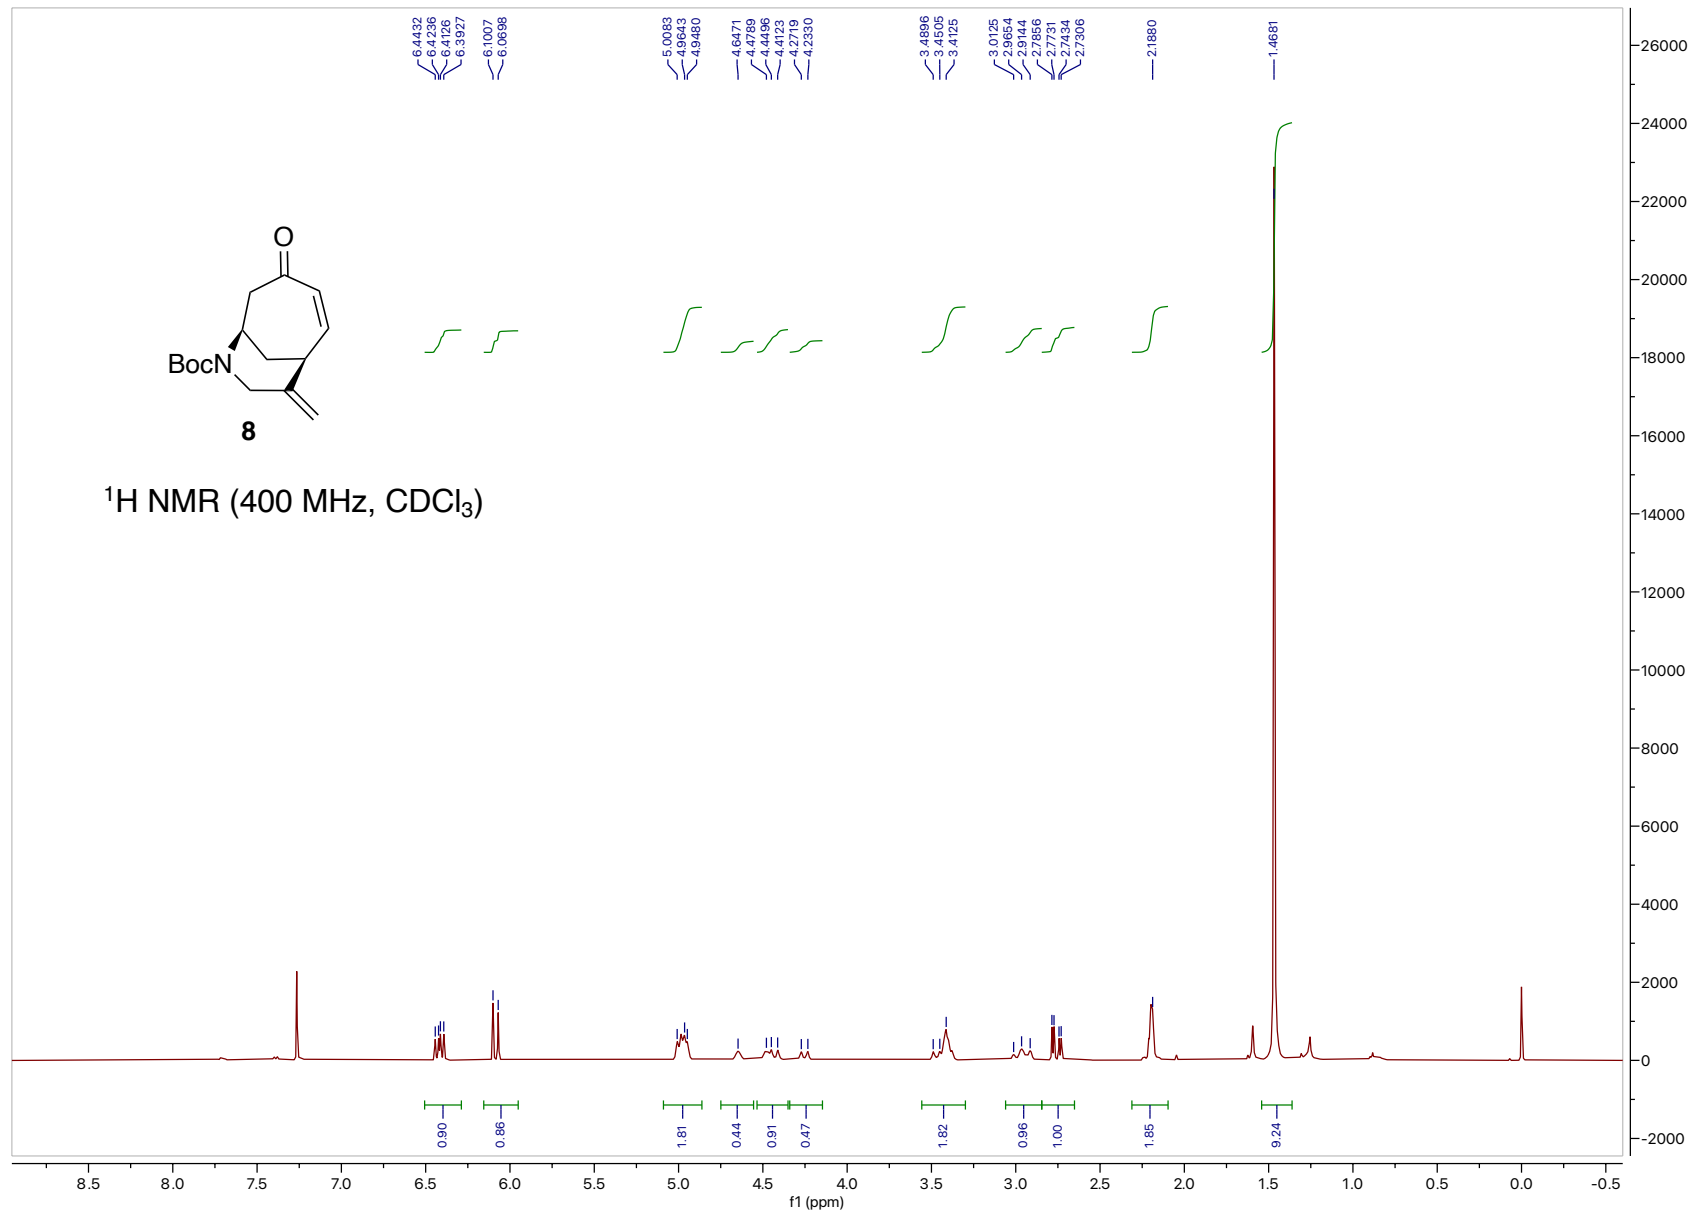



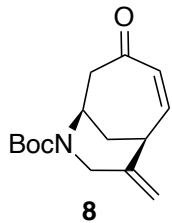

$^{13}\text{C}$  NMR (100 MHz,  $\text{CDCl}_3$ )

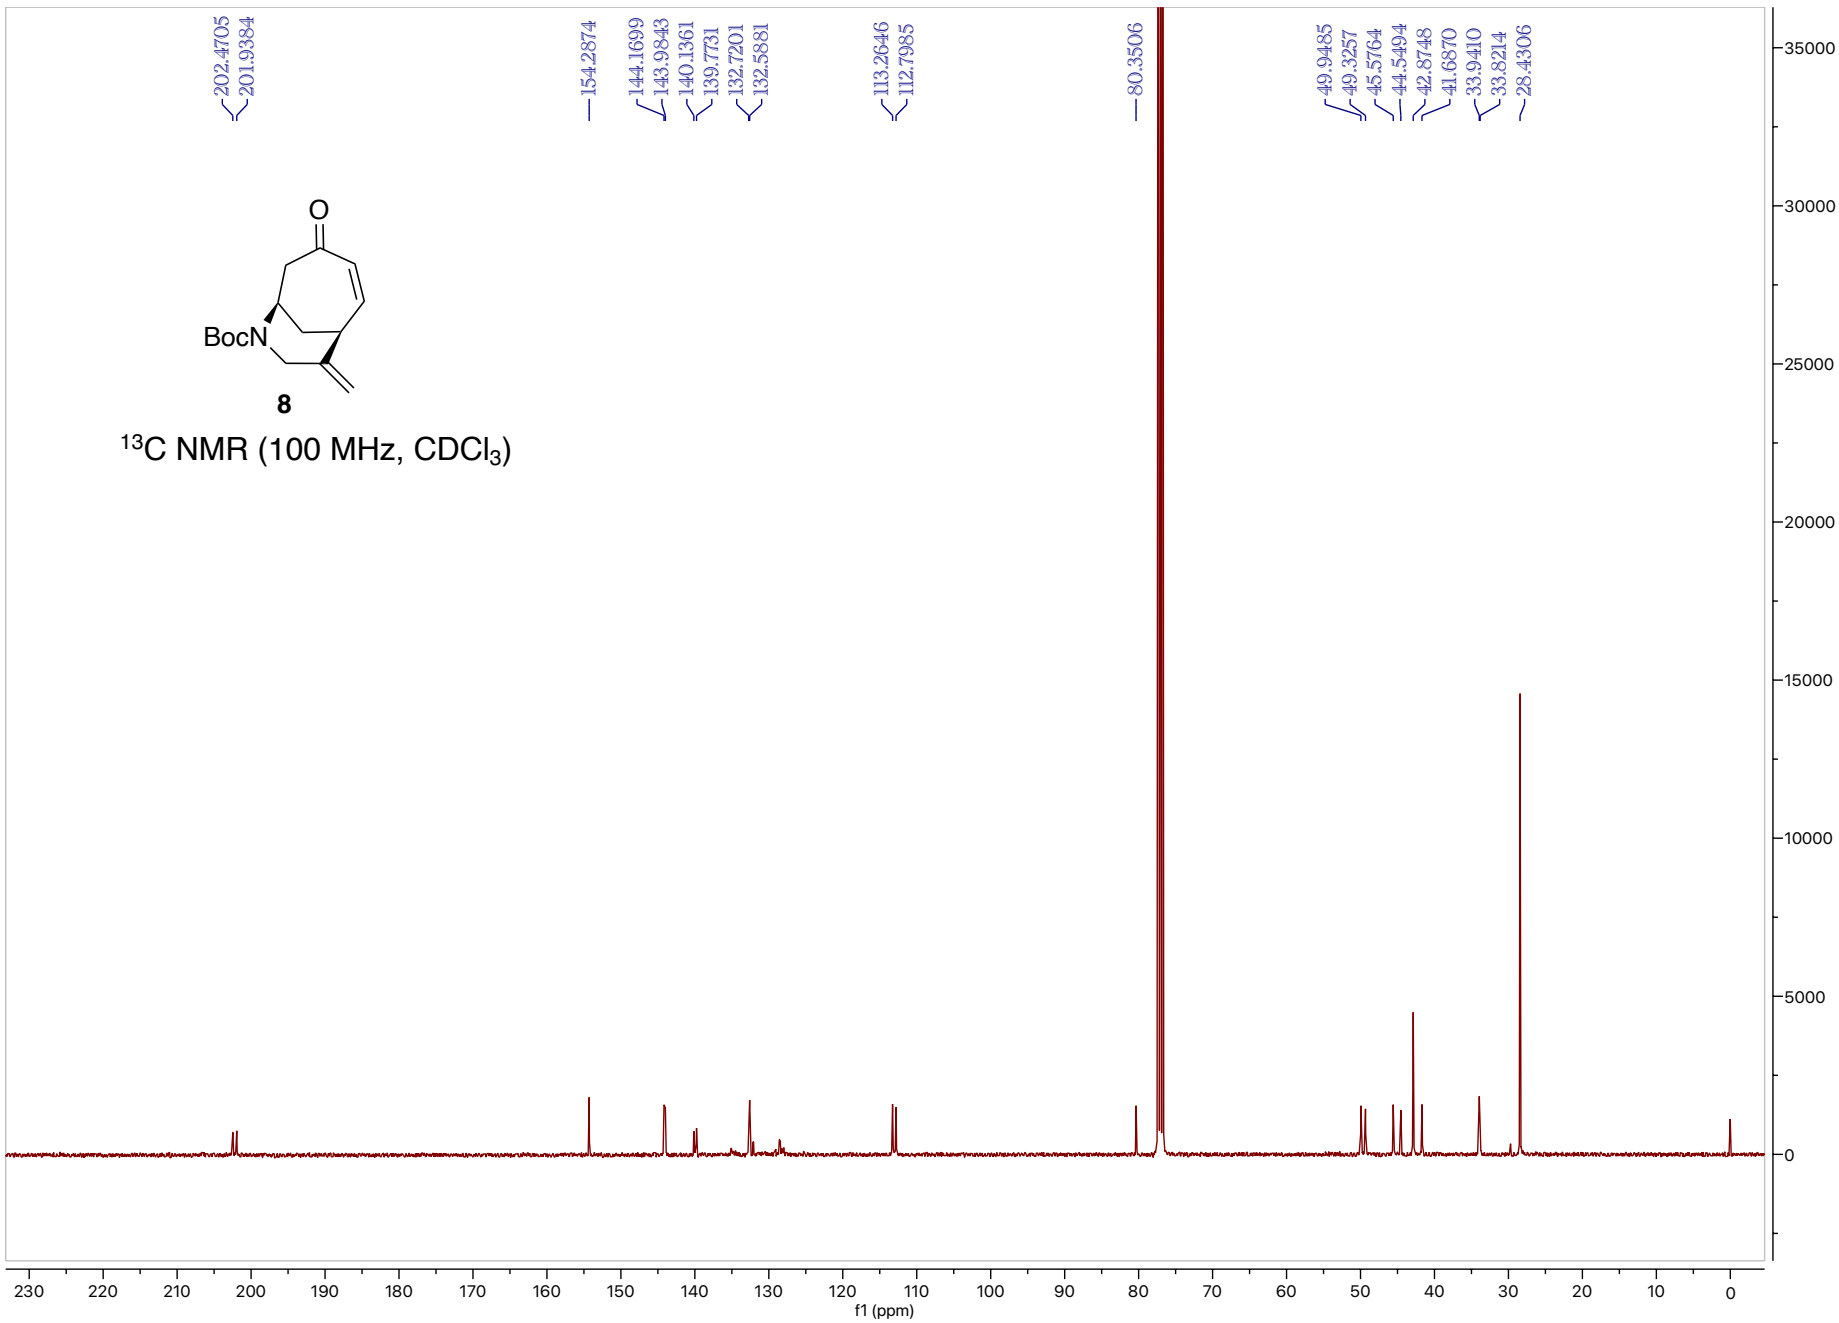

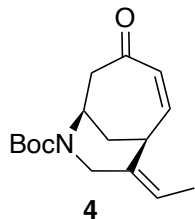

<sup>1</sup>H NMR (400 MHz, CDCl<sub>3</sub>)

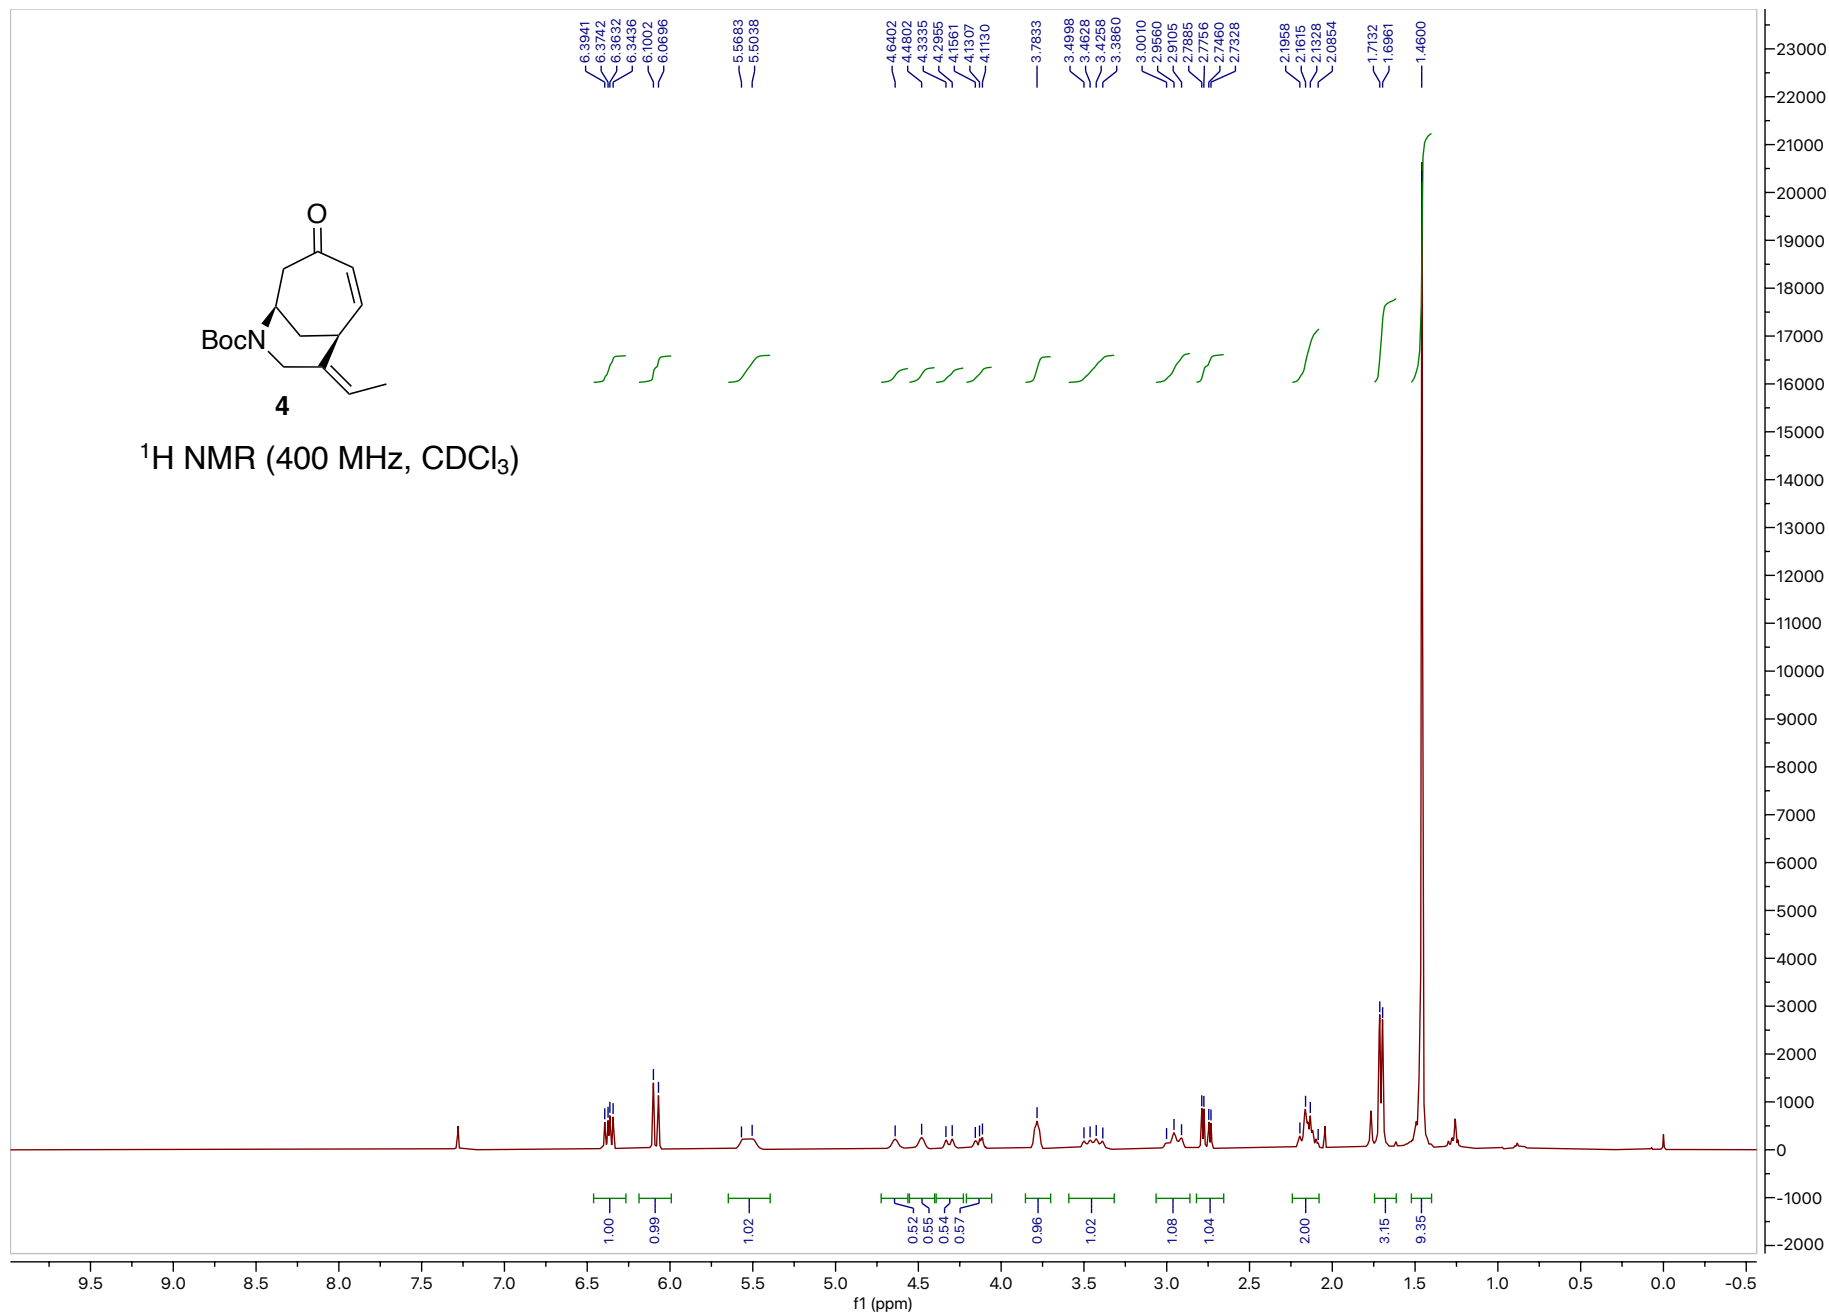

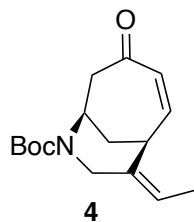

$^{13}\text{C}$  NMR (100 MHz,  $\text{CDCl}_3$ )

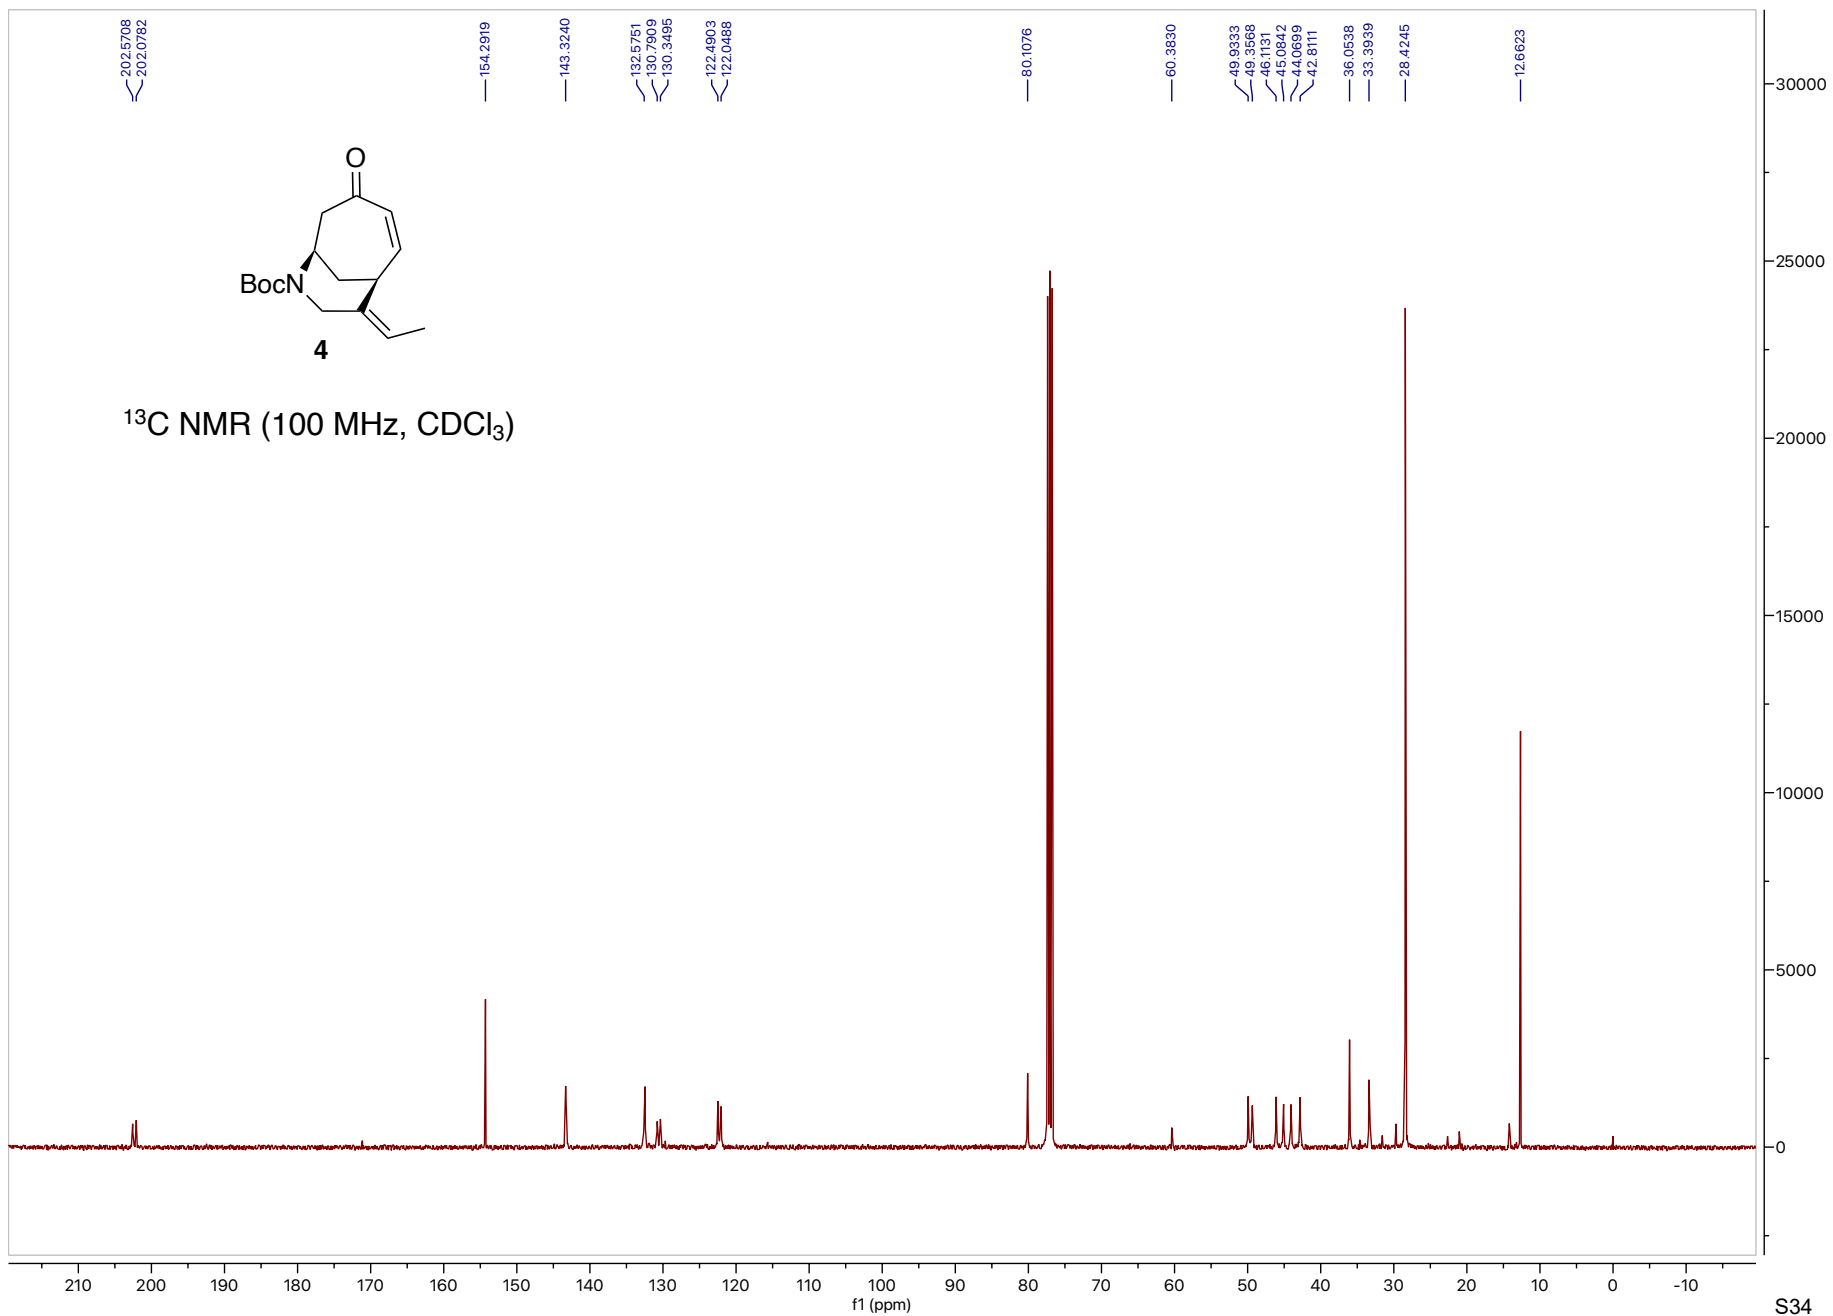

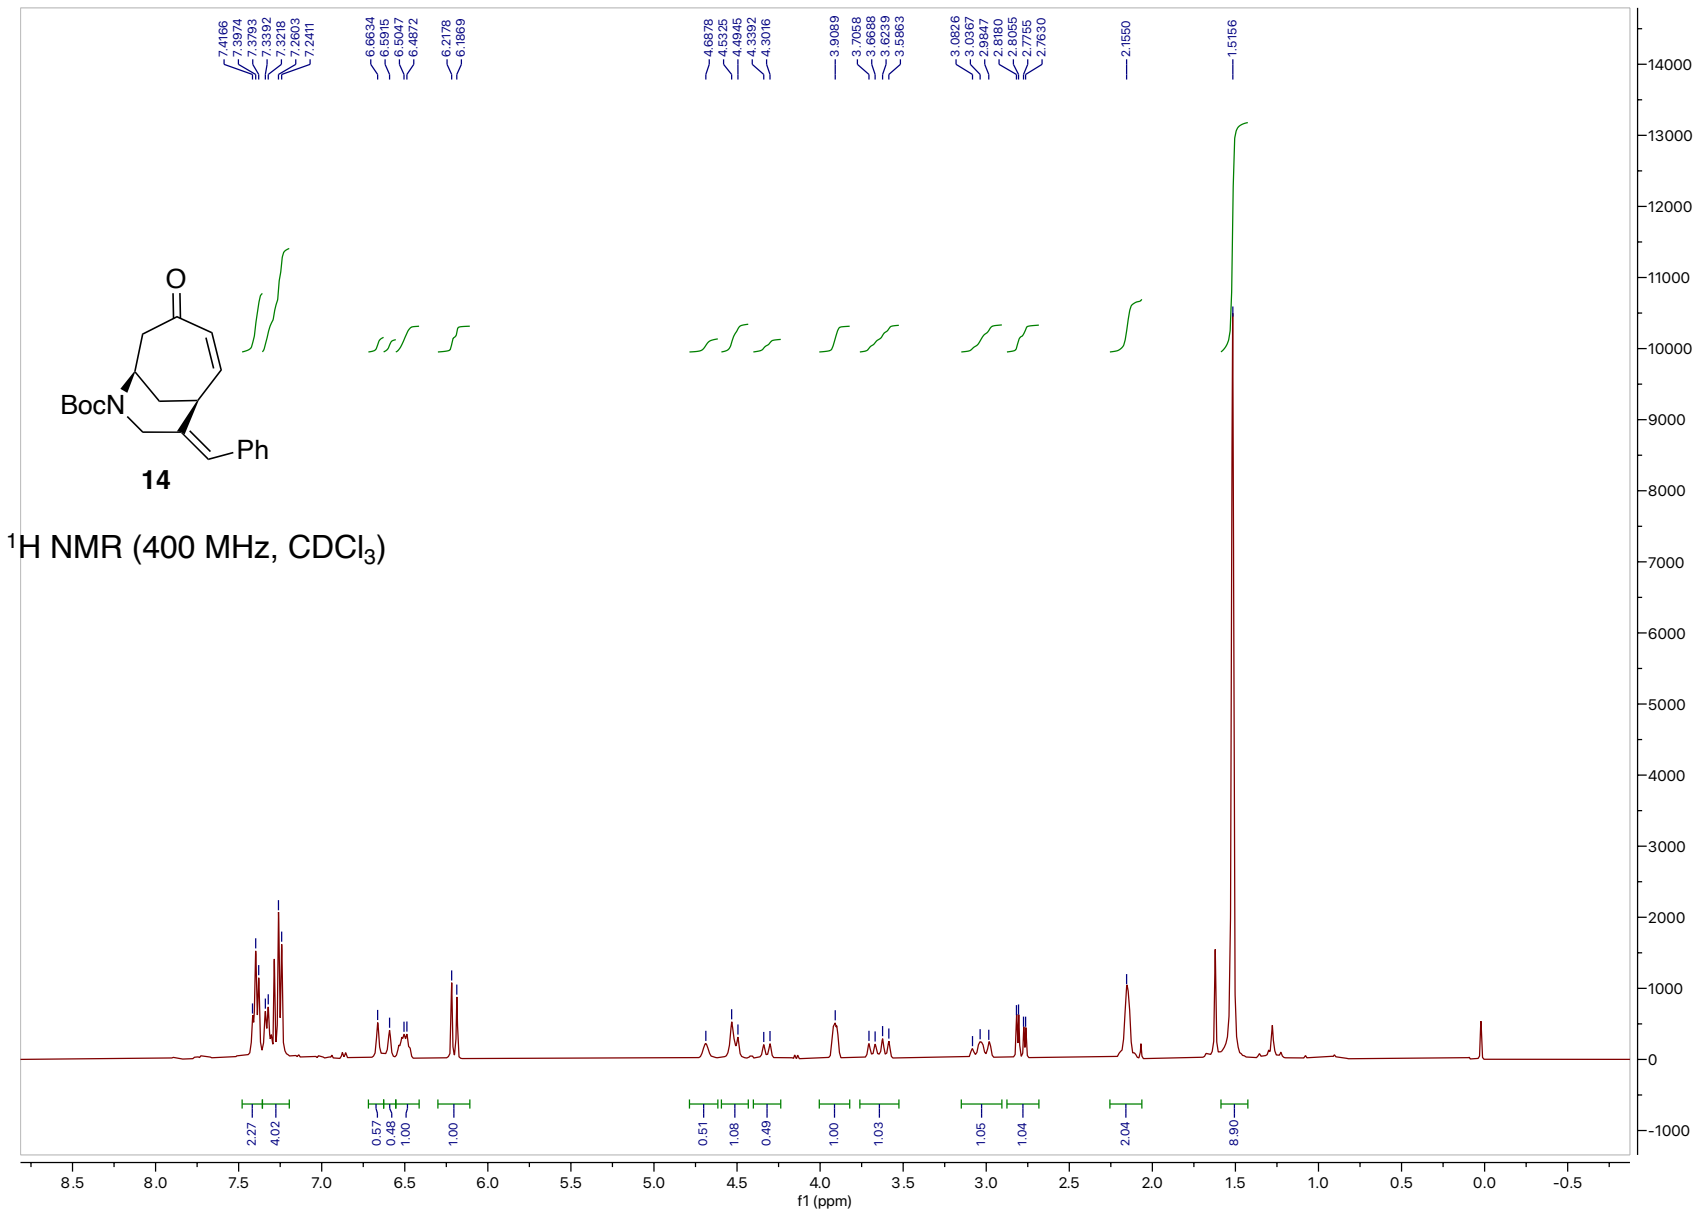

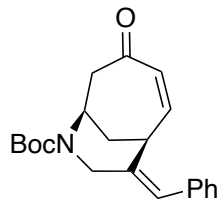

14

$^{13}\text{C}$  NMR (100 MHz,  $\text{CDCl}_3$ )

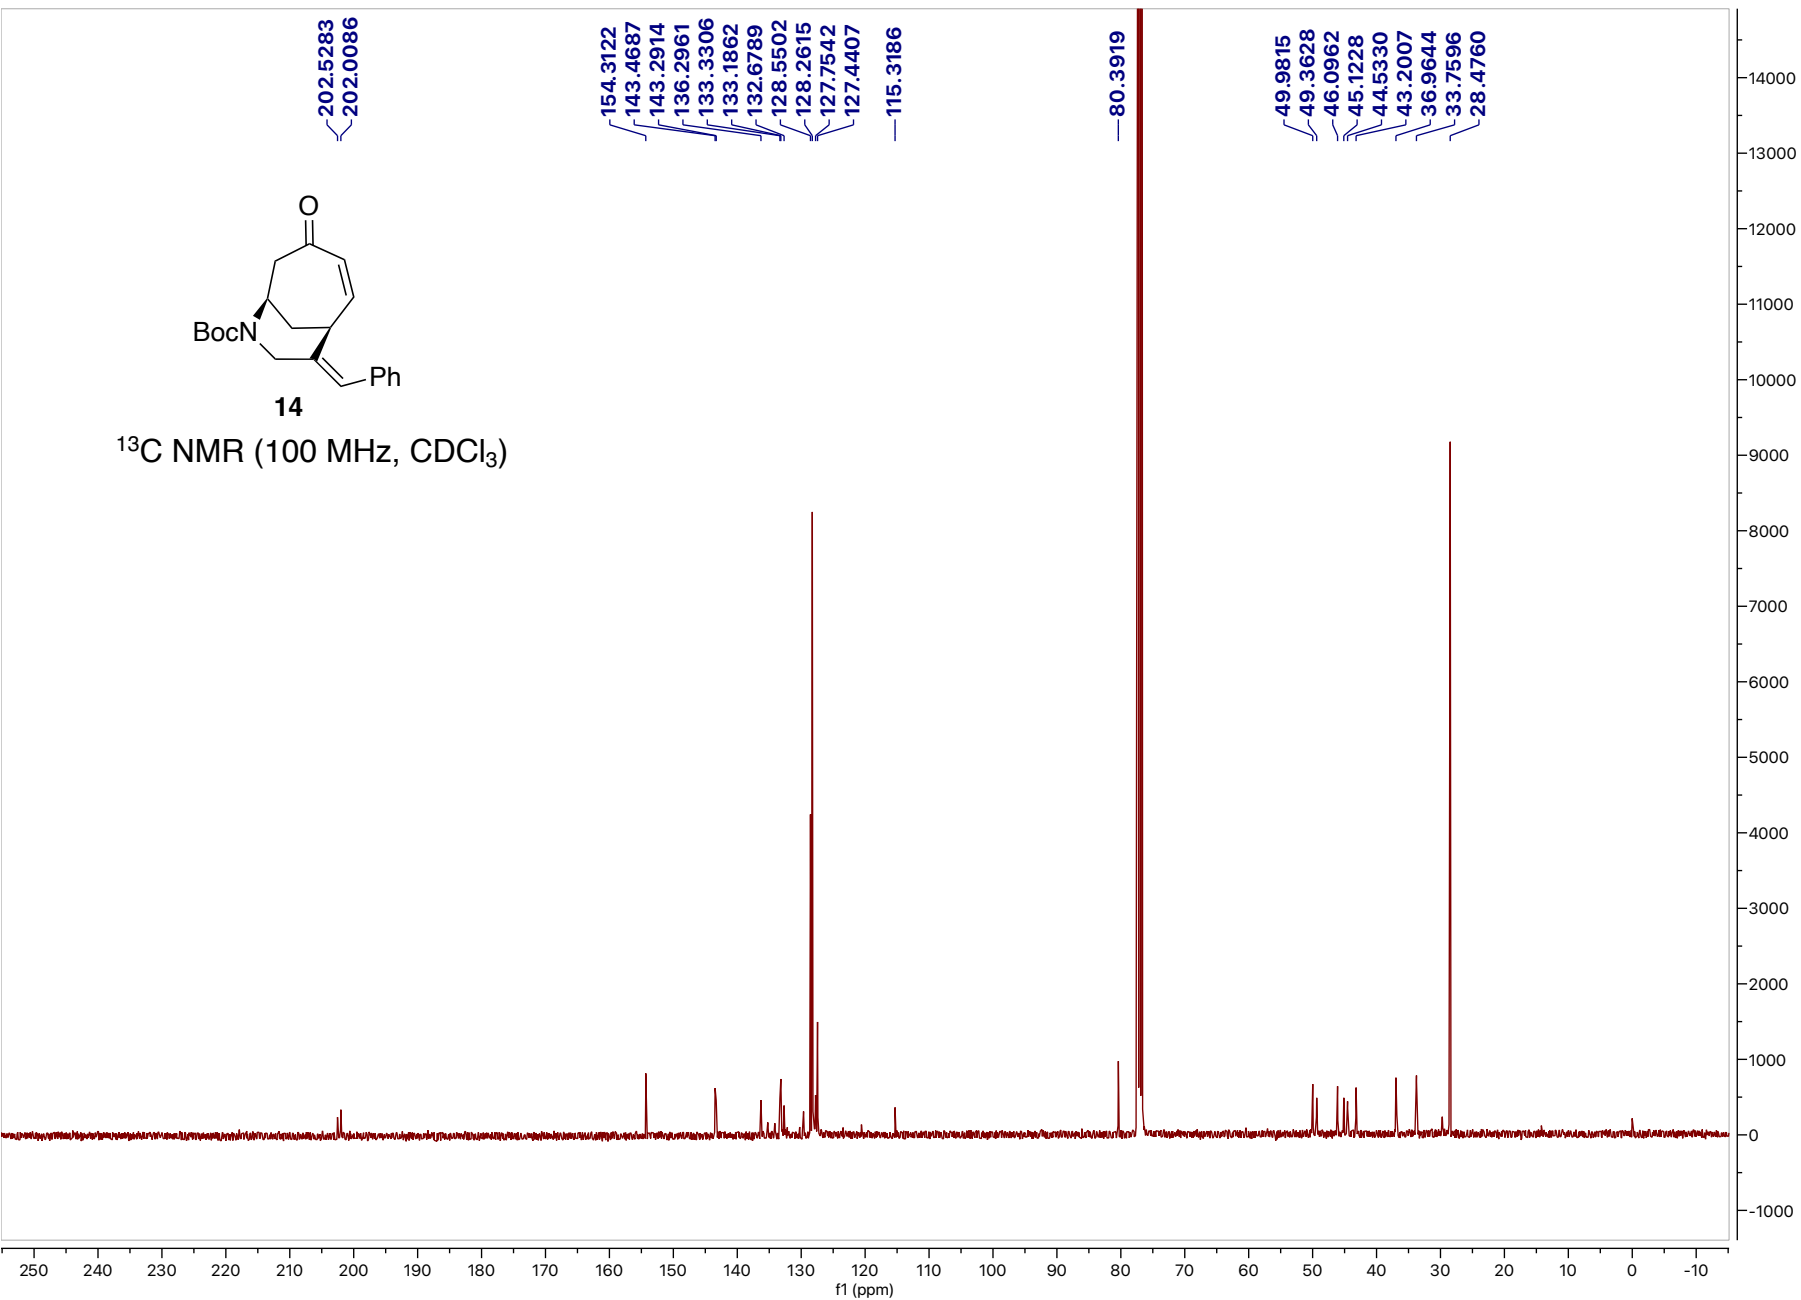

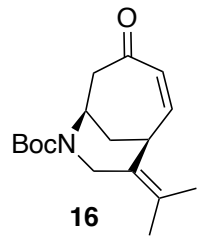

$^1\text{H}$  NMR (400 MHz,  $\text{CDCl}_3$ )

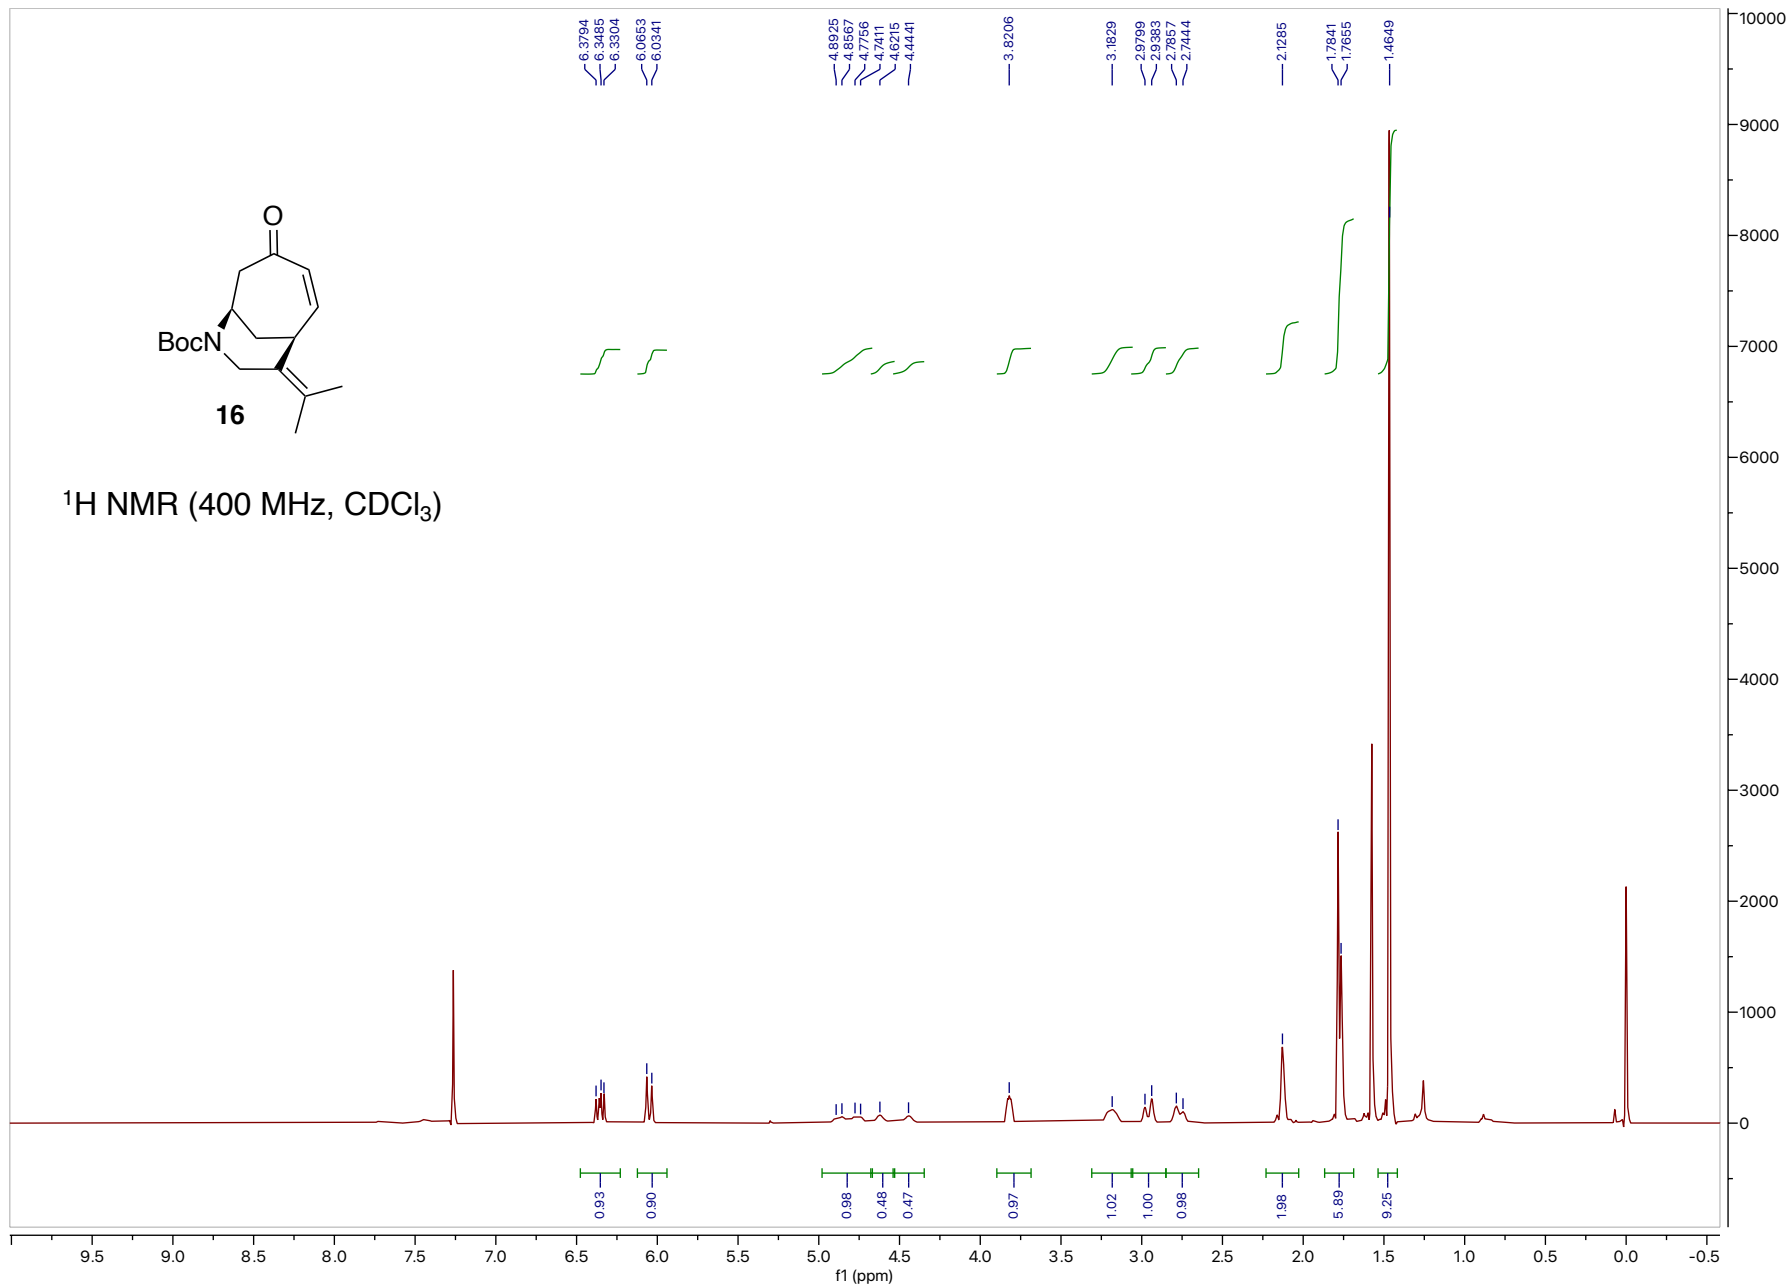

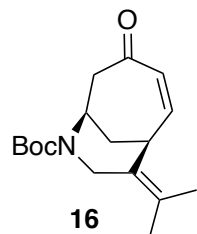

$^{13}\text{C}$  NMR (100 MHz,  $\text{CDCl}_3$ )

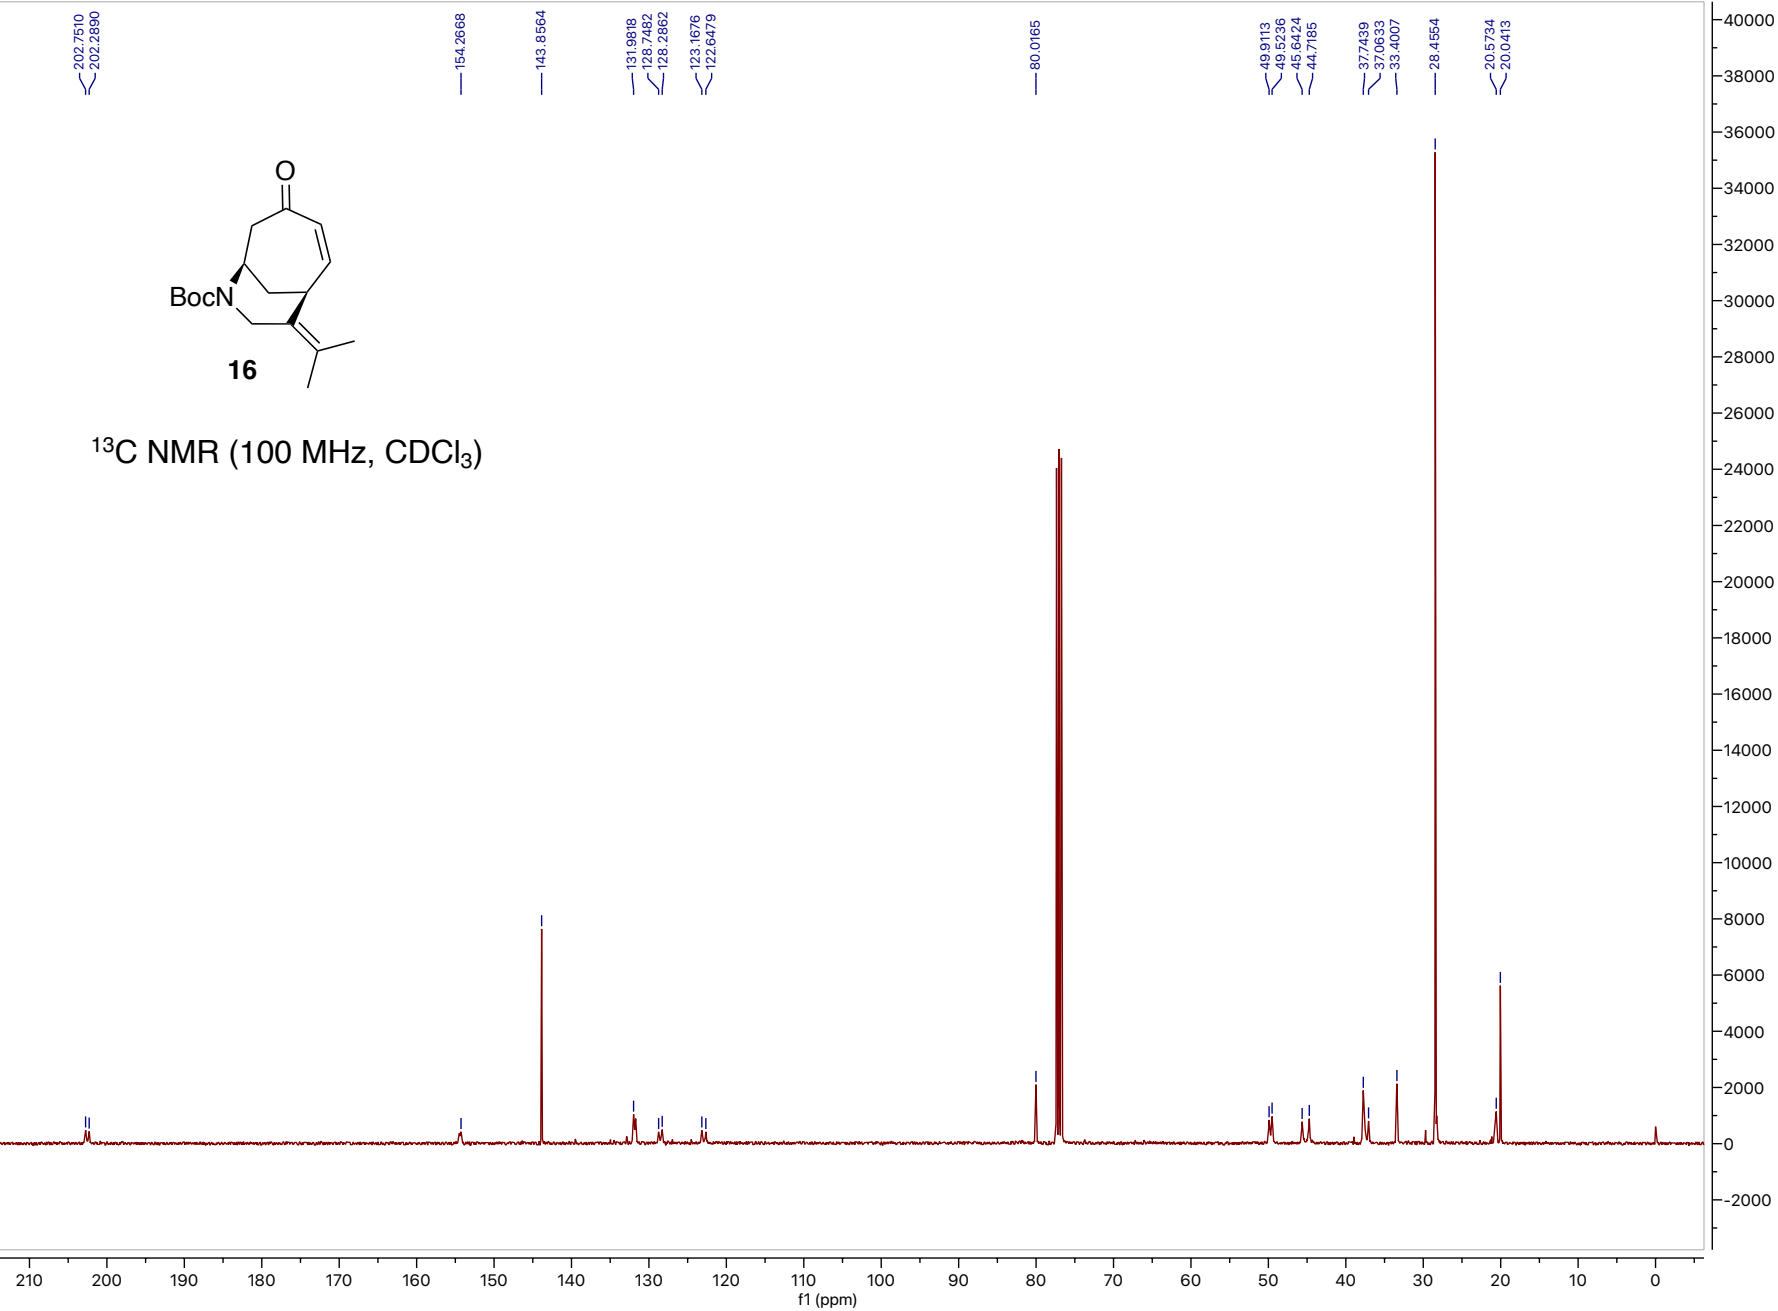

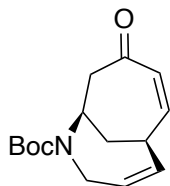

**18**

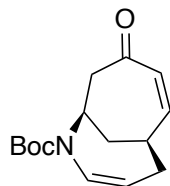

**19**

<sup>1</sup>H NMR (400 MHz, CDCl<sub>3</sub>)

6.7392  
6.7144  
6.6915  
6.3535  
6.3331  
6.0389  
6.0098  
5.7208  
5.5355  
5.5171  
4.6630  
4.5422  
4.3116  
4.2648  
4.0691  
3.8914  
3.8091  
3.5679  
3.1804  
3.1507  
3.1272  
2.9782  
2.9605  
2.9474  
2.9314  
2.4862  
2.4562  
2.1770  
2.1596  
2.1360  
2.1238  
1.4773  
1.4482

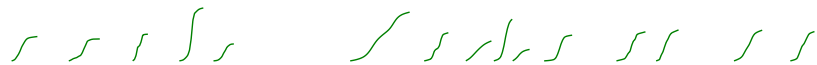

0.91  
0.82  
1.00  
1.98  
0.64  
1.83  
1.06  
0.75  
1.56  
0.43  
0.96  
1.08  
1.16  
1.15  
1.10  
9.52

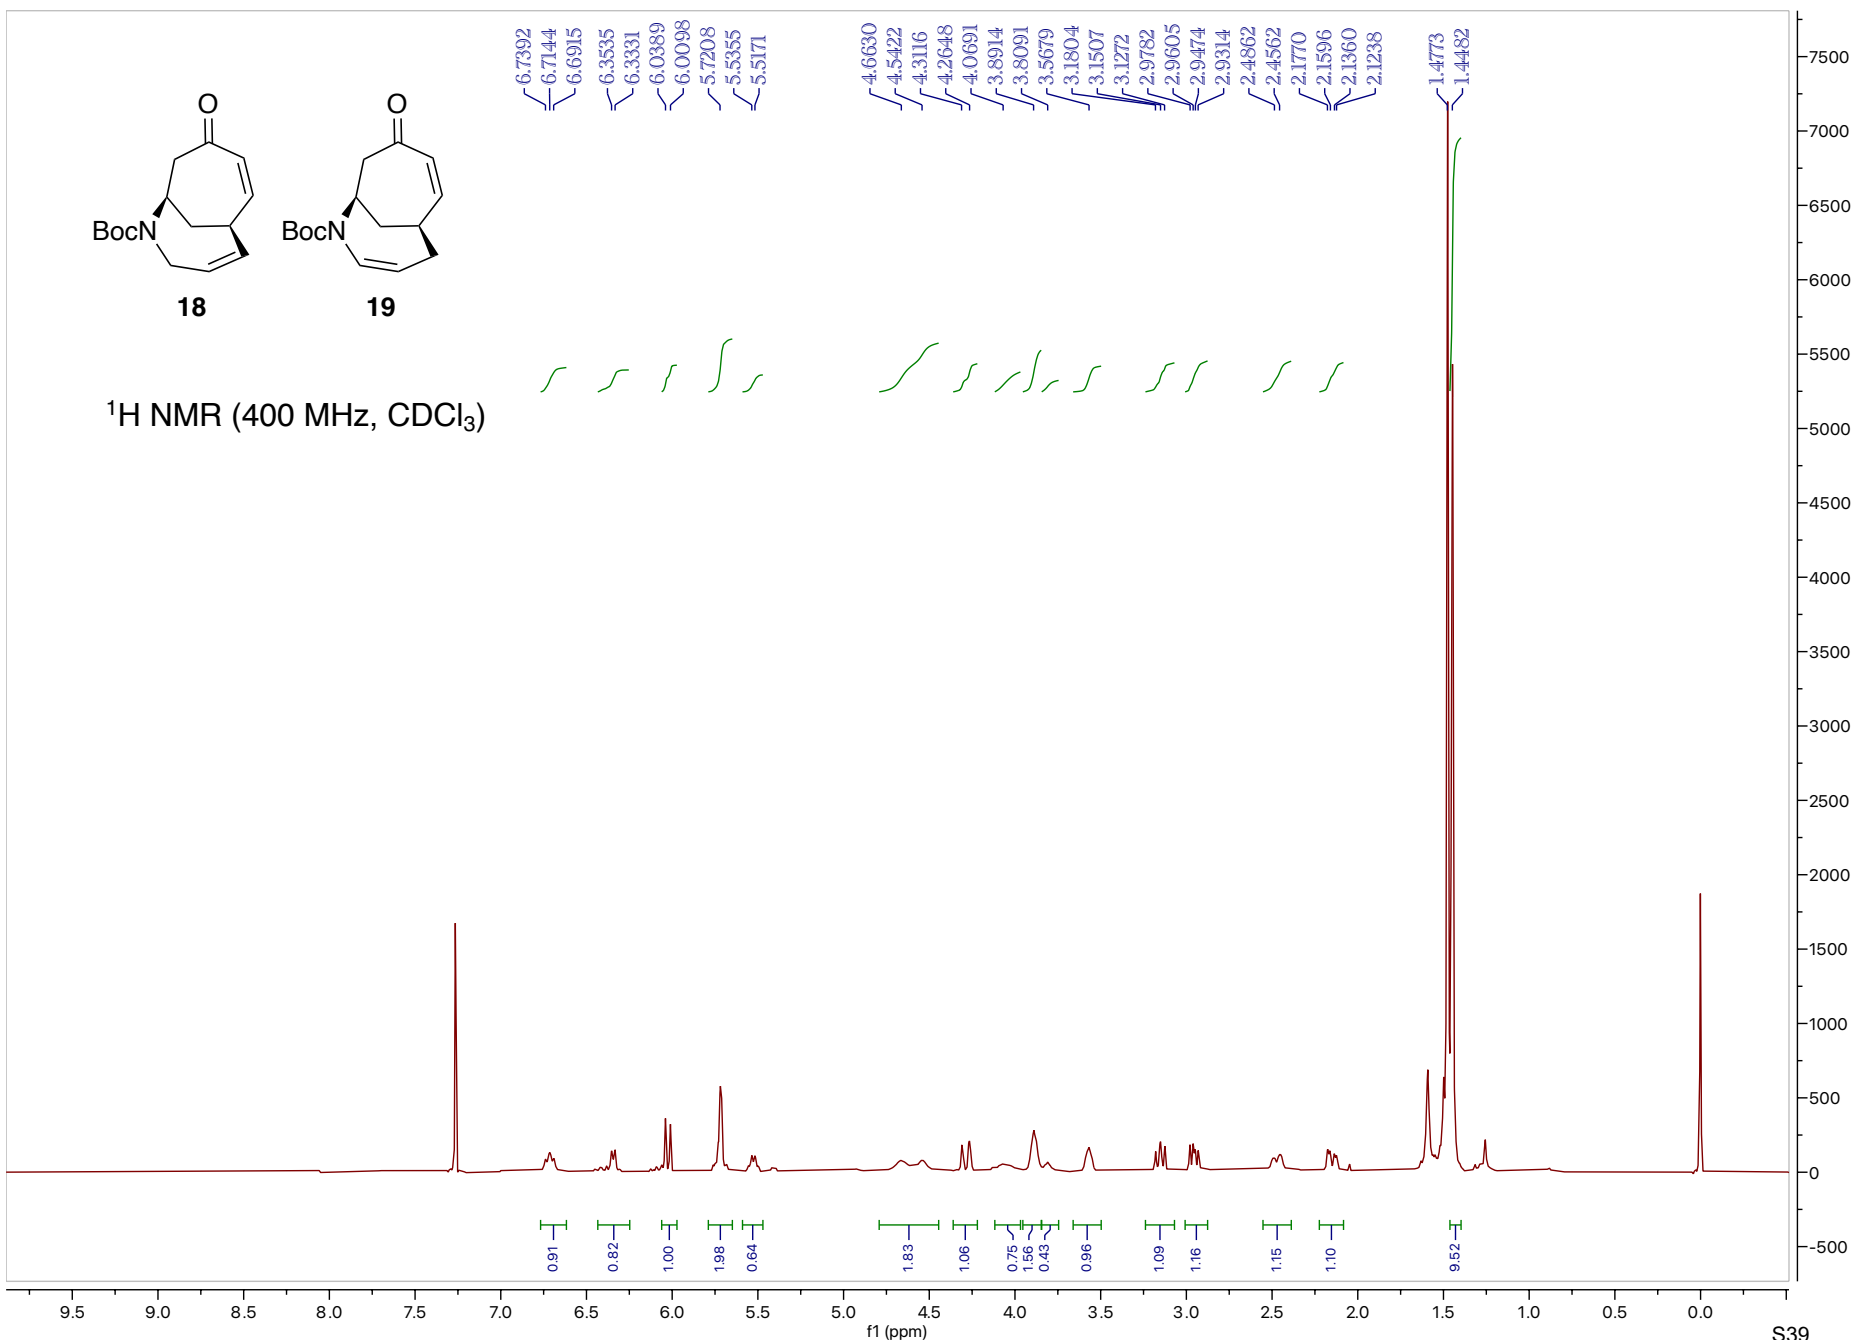



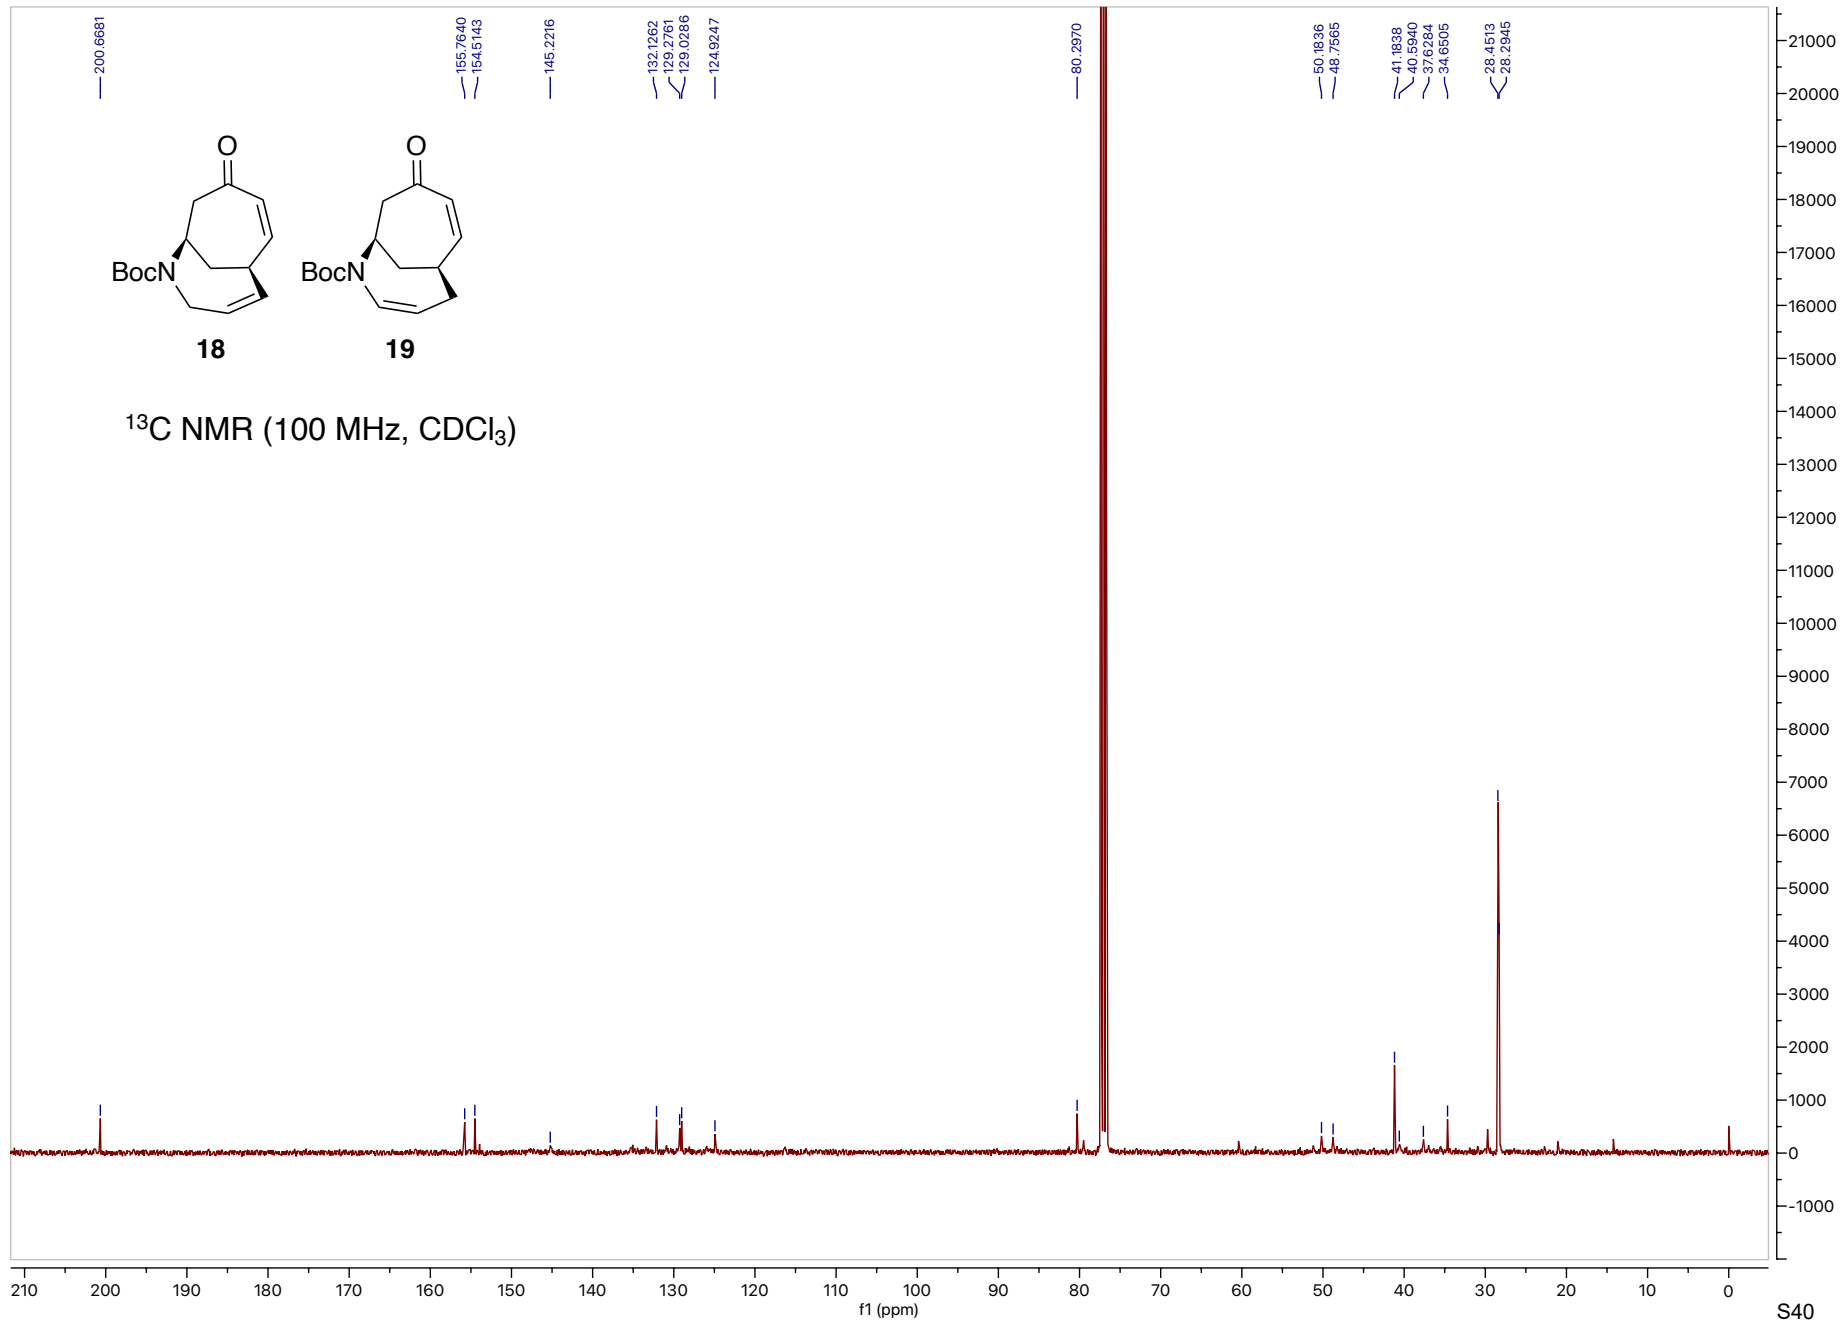

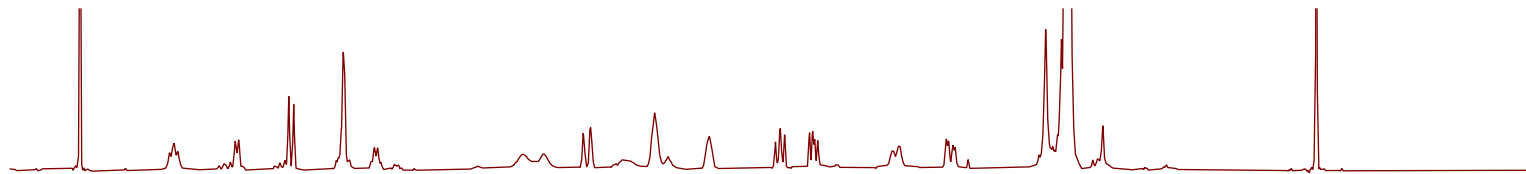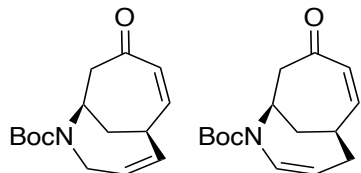

<sup>1</sup>H-<sup>1</sup>H COSY (CDCl<sub>3</sub>)

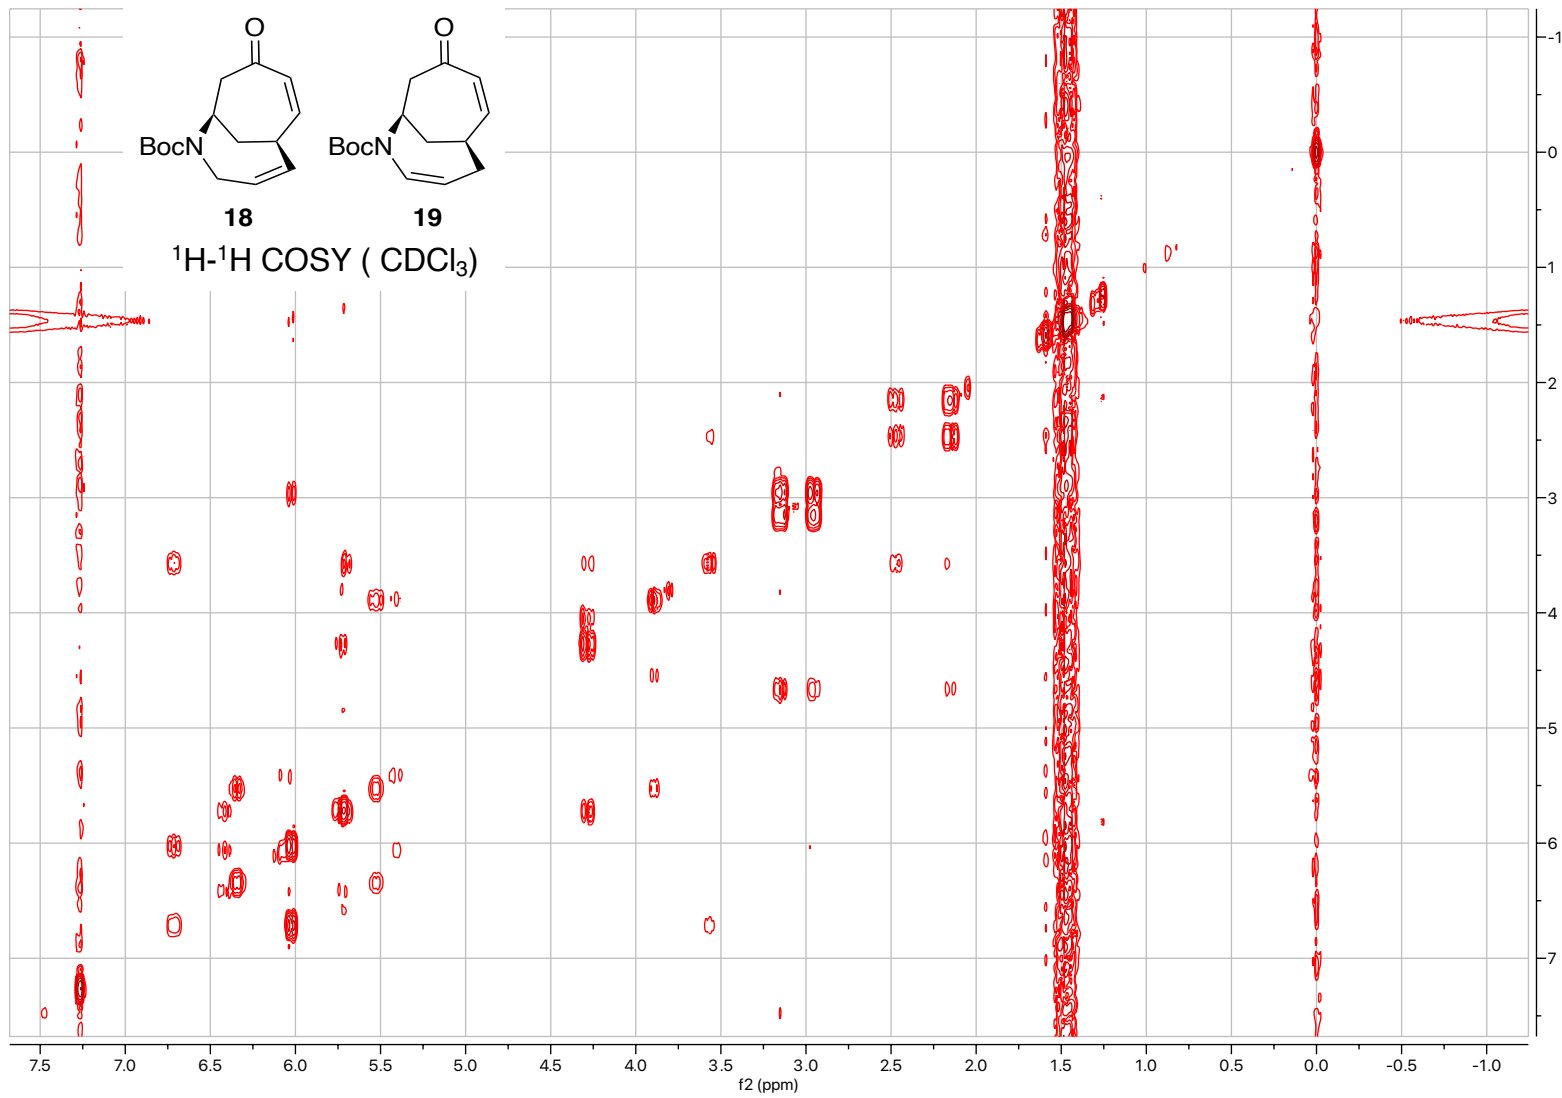

f1 (ppm)

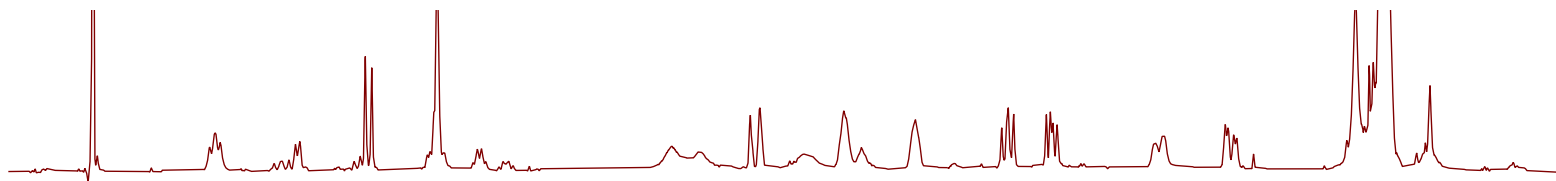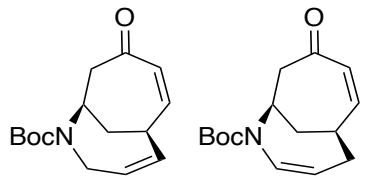

$^1\text{H}$ - $^{13}\text{C}$  HSQC (  $\text{CDCl}_3$  )

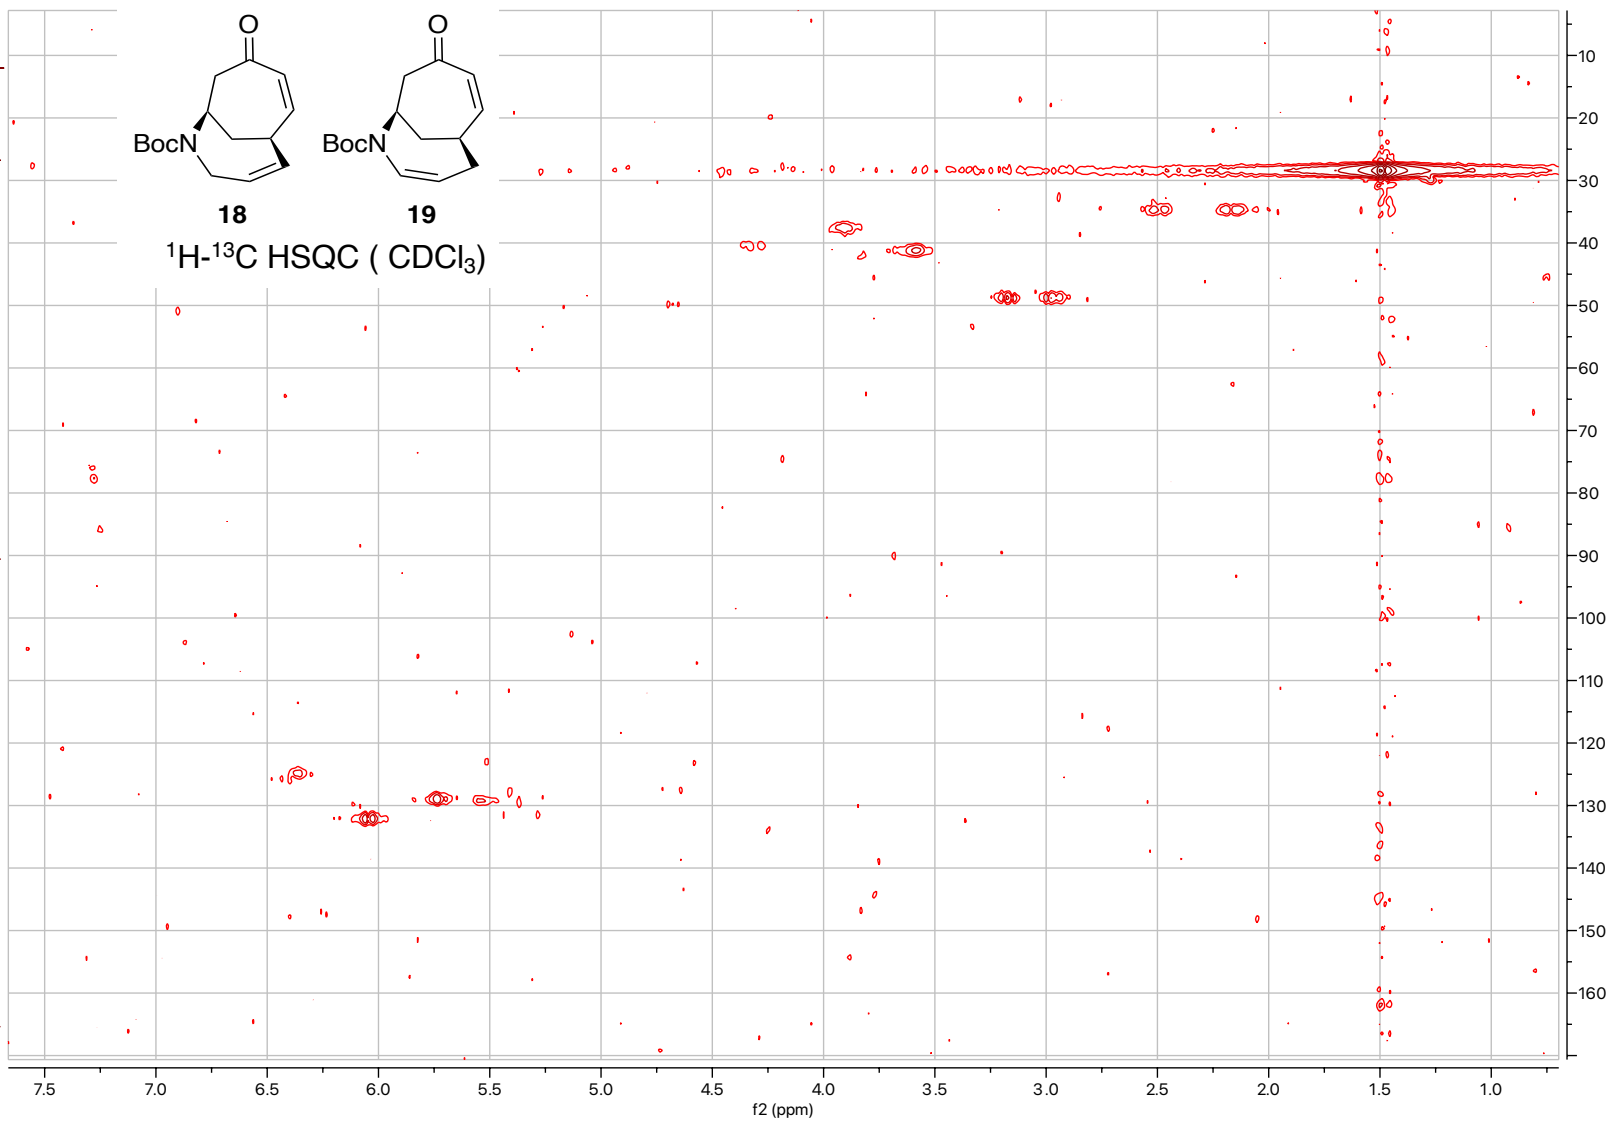

Supplement: Additional file 2 [file 1860-5397-19-118-S2.pdf]
